# Supplementary material for: Natural product-inspired [3 + 2] cycloaddition-based spirooxindoles as dual anticancer agents: synthesis, characterization, and biological evaluation by in vitro and in silico methods
Source: Royal Society of Chemistry journal article supplement (doi:10.1039/d4md00634h), 2024-10-11
Supplement: d4md00634h1.pdf [file d4md00634h1.pdf]

## SUPPORTING INFORMATION

for

### **Natural-Product-inspired [3+2] cycloaddition based new spirooxindoles as dual anticancer agents: Synthesis, characterization, biological evaluation by *in vitro* and *in silico* methods**

Narayanasamy Nivetha<sup>a</sup>, Javid Don Hamid<sup>a</sup>, Akshaya Simha N<sup>b</sup>, Devanand Devegowda<sup>c</sup>, Ramith Ramu<sup>b</sup> and Sivan Velmathi<sup>a\*</sup>

<sup>a</sup> *Organic and Polymer Synthesis Laboratory, Department of Chemistry, National Institute of Technology, Tiruchirappalli - 620015 Tamil Nadu, India.*

<sup>b</sup> *Department of Biotechnology and Bioinformatics, JSS Academy of Higher Education and Research, Mysuru - 570015, Karnataka, India.*

<sup>c</sup> *Center of Excellence in Molecular Biology and Regenerative Medicine, Department of Biochemistry, JSS Medical College, JSS Academy of Higher Education & Research, Mysuru, India.*

\*Corresponding author

Email: velmathis@nitt.edu

## TABLE OF CONTENTS

|                                                                                                                                        |    |
|----------------------------------------------------------------------------------------------------------------------------------------|----|
| Experimental section .....                                                                                                             | 2  |
| Table S1. Anti-proliferative (Cytotoxicity) of Compound 6f and other compounds against MDA-MB-468 cell line and HCT 15 cell line ..... | 17 |
| Table S2. Caspase 3 assay of MDA-MB-468 and HCT 15 cells .....                                                                         | 22 |
| Table S3. Apoptotic assay of MDA-MB-468 and HCT 15 cells .....                                                                         | 23 |
| Table S4. Cell cycle analysis of MDA-MB-468 cells after 48 h .....                                                                     | 24 |
| Table S5. Cell cycle analysis of HCT 15 cells after 48 h .....                                                                         | 24 |
| Spectra of the synthesized compounds .....                                                                                             | 25 |
| References .....                                                                                                                       | 79 |

## Experimental section

### General procedure

All the chemicals were purchased from Sigma Aldrich and used as received. Thin Layer Chromatography was performed in Merck silica gel 60 F<sub>254</sub> plates and visualized under UV light. Melting point were recorded using Veego (VMP-DS) apparatus and were uncorrected. Column chromatography was carried out in 100-200 mesh silica gel using hexane/ ethyl acetate. <sup>1</sup>H and <sup>13</sup>C NMR spectra were collected using DMSO-*d*<sub>6</sub> as solvent and TMS as internal standard in Bruker Avance III spectrometer. FT-IR spectra were obtained on Shimadzu IR Tracer-100 spectrometer using KBr pellets. High resolution mass spectral data were recorded using Agilent's QTOF G6545 spectrometer in ESI mode with 50,000 resolutions. MDA-MB-468 and HCT 15 cell lines were procured from the National Center for Cell Science, Pune, Maharashtra, India. Cell culture grade DMSO, 5-fluorouracil, all cell culture plastics were from Techno Plastic Products (TPP) Pvt Ltd. (Bengaluru, Karnataka, India). Dulbecco's modified Eagle medium (DMEM) with high glucose (4.5 g/L), trypsin-EDTA (0.25%), Dulbecco's phosphate-buffered saline (DPBS), ciprofloxacin, acridine orange (AO), and ethidium bromide (EtBr) were purchased from HiMedia.

### Synthesis of chalcone derivatives (1a-f)

Substituted (E)-3-(4-ethoxy-3-methoxyphenyl)-1-phenylprop-2-en-1-one was prepared according to the reported procedure<sup>1</sup>. Vanillin (4-hydroxy-3-methoxybenzaldehyde) (1.0 mmol) and anhydrous K<sub>2</sub>CO<sub>3</sub> (1.5 mmol) were added to a two neck-round bottom flask containing DMF (3 mL) and heated the reaction mixture at 90 °C for 30 min followed by iodoethane (1.0 mmol) added dropwise. Upon completion of iodoethane addition, the entire reaction mixture was heated under N<sub>2</sub> for 3 h. After the reaction was completed, the reaction mixture was poured into water and extracted with ethyl acetate. The organic layer was dried over anhydrous NaSO<sub>4</sub> and evaporated by using rotary evaporator to get 4-ethoxy-3-methoxybenzaldehyde, which was used without further purification in the next step. The 4-ethoxy-3-methoxybenzaldehyde (1.0 mmol) was dissolved in EtOH (5 mL) and 10% NaOH solution (10 mL) was added dropwise. After stirring the reaction mixture for 30 min at 0 °C, the acetophenone derivatives (1.0 mmol) were added and stirred for 3-4 h. The precipitate appeared was poured into crushed ice, filtered, and washed several times with water. The obtained solid was finally recrystallized from ethanol to get vanillin-based chalcones **1(a-f)**.

## General procedure for the synthesis of pyrrolidine, pyrrolizidine and pyrrolothiazole containing spirooxindole derivatives 4/5/6(a-f)

A mixture of vanillin-based chalcones **1(a-f)** (1.0 mmol), isatin **2** (1.0 mmol) and amino acids **3(a-c)** (1.0 mmol) in ethanol (10 mL) was heated under reflux for the appropriate time of 3 h. After the completion of the reaction, the reaction mixture was poured into water and extracted with ethyl acetate. The extract was then dried over NaSO<sub>4</sub> and concentrated under reduced pressure. The crude was subjected to column chromatography using 100-200 mesh silica gel as stationary phase and hexane/ethyl acetate as an eluent to afford pure spirooxindole derivatives.

### Spectral characterization data

3'-benzoyl-4'-(4-ethoxy-3-methoxyphenyl)-1'-methylspiro[indoline-3,2'-pyrrolidin]-2-one  
**(4a)**

White solid. Yield: 83%. M.p. 65-67 °C. FT-IR (KBr, cm<sup>-1</sup>)  $\nu_{\max}$ : 3284 (NH), 1712 (C=O), 1610 (C=O). <sup>1</sup>H NMR (500 MHz, DMSO-*d*<sub>6</sub>)  $\delta_{\text{H}}$ : 1.28 (CH<sub>3</sub>) (t, 3H, *J* = 7.0 Hz), 2.06 (N-CH<sub>3</sub>) (s, 3H), 3.37 (H-5) (t, 1H, *J* = 7.8 Hz), 3.43 (H-5) (t, 1H, *J* = 9.3 Hz), 3.76 (O-CH<sub>3</sub>) (s, 3H), 3.95 (O-CH<sub>2</sub>) (q, 2H, *J* = 6.8 Hz), 4.28-4.33 (H-4) (m, 1H), 4.43 (H-3) (d, 1H, *J* = 9.5 Hz), 6.48 (d, 1H, *J* = 7.5 Hz, Ar-H), 6.82 (t, 1H, *J* = 7.3 Hz, Ar-H), 6.87 (d, 1H, *J* = 8.0 Hz, Ar-H), 6.90 (dd, 1H, *J* = 1.5 & 8.5 Hz, Ar-H), 6.94 (d, 1H, *J* = 7.5 Hz, Ar-H), 6.97 (td, 1H, *J* = 1.2 & 7.7 Hz, Ar-H), 7.04 (d, 1H, *J* = 2.0 Hz, Ar-H), 7.26 (t, 2H, *J* = 7.8 Hz, Ar-H), 7.38 (d, 2H, *J* = 7.5 Hz, Ar-H), 7.42 (t, 1H, *J* = 7.5 Hz, Ar-H), 10.48 (NH) (s, 1H). <sup>13</sup>C NMR (125 MHz, DMSO-*d*<sub>6</sub>)  $\delta_{\text{C}}$ : 15.24 (CH<sub>3</sub>), 34.91 (N-CH<sub>3</sub>), 44.27 (C-4), 55.92 (O-CH<sub>3</sub>), 60.31 (C-5), 62.04 (C-3), 64.21 (O-CH<sub>2</sub>), 73.10 (C-2), 109.56, 112.35, 113.72, 119.92, 122.08, 126.55, 127.26, 127.66, 128.83, 129.42, 133.48, 134.29, 137.18, 142.54, 147.35, 149.44, 179.53 (C=O), 197.74 (C=O). HRMS (ESI, *m/z*): [M+H]<sup>+</sup> Calcd. for C<sub>28</sub>H<sub>29</sub>N<sub>2</sub>O<sub>4</sub> 457.2127; Found 457.2130.

4'-(4-ethoxy-3-methoxyphenyl)-3'-(4-fluorobenzoyl)-1'-methylspiro[indoline-3,2'-pyrrolidin]-2-one **(4b)**

White solid. Yield: 91%. M.p. 74-76 °C. FT-IR (KBr, cm<sup>-1</sup>)  $\nu_{\max}$ : 3292 (NH), 1712 (C=O), 1597 (C=O). <sup>1</sup>H NMR (500 MHz, DMSO-*d*<sub>6</sub>)  $\delta_{\text{H}}$ : 1.33 (CH<sub>3</sub>) (t, 1H, *J* = 7.0 Hz), 2.10 (N-CH<sub>3</sub>) (s, 3H), 3.41 (H-5) (t, 1H, *J* = 8.0 Hz), 3.46 (H-5) (t, 1H, *J* = 9.3 Hz), 3.99 (O-CH<sub>2</sub>) (q, 2H, *J* = 6.8 Hz), 3.81 (O-CH<sub>3</sub>) (s, 3H), 4.30-4.36 (H-4) (m, 1H), 4.44 (H-3) (d, 1H, *J* = 9.5 Hz), 6.54 (d, 1H, *J* = 7.5 Hz, Ar-H), 6.87 (td, 1H, *J* = 1.0 & 7.5 Hz, Ar-H), 6.90 (d, 1H, *J* = 8.5 Hz, Ar-

H), 6.93 (d, 1H,  $J = 2.0$  Hz, Ar-H), 6.95-6.97 (m, 1H, Ar-H), 7.03 (td, 1H,  $J = 1.2$  & 7.7 Hz, Ar-H), 7.08 (d, 1H,  $J = 2.0$  Hz, Ar-H), 7.13 (t, 2H,  $J = 8.8$  Hz, Ar-H), 7.47-7.49 (m, 2H, Ar-H), 10.47 (NH) (s, 1H).  $^{13}\text{C}$  NMR (125 MHz, DMSO- $d_6$ )  $\delta_{\text{C}}$ : 15.24 (CH<sub>3</sub>), 34.93 (N-CH<sub>3</sub>), 44.12 (C-4), 55.92 (O-CH<sub>3</sub>), 60.36 (C-5), 62.16 (C-3), 64.22 (O-CH<sub>2</sub>), 73.10 (C-2), 109.59, 112.37, 113.71, 115.86 (d,  $J_{\text{CF}} = 21.3$  Hz), 119.96, 122.11, 126.45, 127.19, 129.50, 130.62 (d,  $J_{\text{CF}} = 10.0$  Hz), 133.97, 134.22, 142.50, 147.36, 149.45, 164.14, 166.14, 179.40 (C=O), 196.36 (C=O). HRMS (ESI, m/z): [M+H]<sup>+</sup> Calcd. for C<sub>28</sub>H<sub>28</sub>FN<sub>2</sub>O<sub>4</sub> 475.2033; Found 475.2033.

3'-(4-chlorobenzoyl)-4'-(4-ethoxy-3-methoxyphenyl)-1'-methylspiro[indoline-3,2'-pyrrolidin]-2-one (**4c**)

White solid. Yield: 87%. M.p. 80-82 °C. FT-IR (KBr, cm<sup>-1</sup>)  $\nu_{\text{max}}$ : 3284 (NH), 1712 (C=O), 1618 (C=O).  $^1\text{H}$  NMR (500 MHz, DMSO- $d_6$ )  $\delta_{\text{H}}$ : 1.28 (CH<sub>3</sub>) (t, 3H,  $J = 7.0$  Hz), 2.06 (N-CH<sub>3</sub>) (s, 3H), 3.27 (H-5) (t, 1H,  $J = 8.0$  Hz), 3.43 (H-5) (t, 1H,  $J = 9.0$  Hz), 3.77 (O-CH<sub>3</sub>) (s, 3H), 3.95 (O-CH<sub>2</sub>) (q, 2H,  $J = 7.0$  Hz), 4.27-4.32 (H-4) (m, 1H), 4.40 (H-3) (d, 1H,  $J = 9.0$  Hz), 6.50 (d, 1H,  $J = 7.5$  Hz, Ar-H), 6.82 (dd, 1H,  $J = 1.0$  & 7.5 Hz, Ar-H), 6.85 (d, 1H,  $J = 1.0$  Hz, Ar-H), 6.86 (d, 1H,  $J = 8.5$  Hz, Ar-H), 6.90 (d, 1H,  $J = 2.0$  Hz, Ar-H), 6.93 (d, 1H,  $J = 7.5$  Hz, Ar-H), 7.00 (td, 1H,  $J = 1.2$  & 7.7 Hz, Ar-H), 7.1 (d, 1H,  $J = 1.5$  Hz, Ar-H), 7.30-7.37 (m, 4H, Ar-H), 10.47 (NH) (s, 1H).  $^{13}\text{C}$  NMR (125 MHz, DMSO- $d_6$ )  $\delta_{\text{C}}$ : 15.23 (CH<sub>3</sub>), 34.91 (N-CH<sub>3</sub>), 44.08 (C-4), 55.93 (O-CH<sub>3</sub>), 60.39 (C-5), 62.24 (C-3), 64.21 (O-CH<sub>2</sub>), 73.08 (C-2), 109.63, 112.38, 113.72, 119.98, 122.14, 126.47, 127.12, 128.90, 129.49, 129.54, 134.20, 135.85, 138.35, 142.51, 147.39, 149.47, 179.34 (C=O), 196.84 (C=O). HRMS (ESI, m/z): [M+H]<sup>+</sup> Calcd. for C<sub>28</sub>H<sub>28</sub>ClN<sub>2</sub>O<sub>4</sub> 491.1738; Found 491.1744.

3'-(4-bromobenzoyl)-4'-(4-ethoxy-3-methoxyphenyl)-1'-methylspiro[indoline-3,2'-pyrrolidin]-2-one (**4d**)

White solid. Yield: 85%. M.p. 69-71 °C. FT-IR (KBr, cm<sup>-1</sup>)  $\nu_{\text{max}}$ : 3290 (NH), 1710 (C=O), 1617 (C=O).  $^1\text{H}$  NMR (500 MHz, DMSO- $d_6$ )  $\delta_{\text{H}}$ : 1.29 (CH<sub>3</sub>) (t, 3H,  $J = 7.0$  Hz), 2.06 (N-CH<sub>3</sub>) (s, 3H), 3.37 (H-5) (t, 1H,  $J = 8.0$  Hz), 3.42 (H-5) (t, 1H,  $J = 9.3$  Hz), 3.77 (O-CH<sub>3</sub>) (s, 3H), 3.96 (O-CH<sub>2</sub>) (q, 2H,  $J = 7.0$  Hz), 4.26-4.31 (H-4) (m, 1H), 4.39 (H-3) (d, 1H,  $J = 9.0$  Hz), 6.50 (d, 1H,  $J = 7.5$  Hz, Ar-H), 6.82-6.85 (m, 1H, Ar-H), 6.87 (d, 1H,  $J = 3.5$  Hz, Ar-H), 6.89 (d, 1H,  $J = 1.5$  Hz, Ar-H), 6.92 (d, 1H,  $J = 7.5$  Hz, Ar-H), 7.00 (td, 1H,  $J = 1.2$  & 7.7 Hz, Ar-H), 7.04 (d, 1H,  $J = 2.0$  Hz, Ar-H), 7.28 (d, 2H,  $J = 9.0$  Hz, Ar-H), 7.47 (d, 2H,  $J = 8.5$  Hz, Ar-H), 10.46 (NH) (s, 1H).  $^{13}\text{C}$  NMR (125 MHz, DMSO- $d_6$ )  $\delta_{\text{C}}$ : 15.24 (CH<sub>3</sub>), 34.91 (N-CH<sub>3</sub>), 44.08 (C-4), 55.96 (O-CH<sub>3</sub>), 60.38 (C-5), 62.19 (C-3), 64.25 (O-CH<sub>2</sub>), 73.07 (C-2), 109.64, 112.40,

113.77, 119.98, 122.15, 126.48, 127.10, 127.56, 129.59, 131.88, 134.20, 136.17, 142.51, 147.39, 149.48, 179.31 (C=O), 197.07 (C=O). HRMS (ESI, m/z): [M+H]<sup>+</sup> Calcd. for C<sub>28</sub>H<sub>28</sub>BrN<sub>2</sub>O<sub>4</sub> 535.1232; Found 535.1231.

4'-(4-ethoxy-3-methoxyphenyl)-1'-methyl-3'-(4-nitrobenzoyl)spiro[indoline-3,2'-pyrrolidin]-2-one (**4e**)

White solid. Yield: 79%. M.p. 96-98 °C. FT-IR (KBr, cm<sup>-1</sup>)  $\nu_{\max}$ : 3292 (NH), 1701 (C=O), 1608 (C=O). <sup>1</sup>H NMR (500 MHz, DMSO-*d*<sub>6</sub>)  $\delta_{\text{H}}$ : 1.28 (CH<sub>3</sub>) (t, 3H, *J* = 7.0 Hz), 2.06 (N-CH<sub>3</sub>) (s, 3H), 3.38 (H-5) (t, 1H, *J* = 8.0 Hz), 3.43 (H-5) (t, 1H, *J* = 8.5 Hz), 3.78 (O-CH<sub>3</sub>) (s, 3H), 3.95 (O-CH<sub>2</sub>) (q, 2H, *J* = 7.0 Hz), 4.28-4.33 (H-4) (m, 1H), 4.49 (H-3) (d, 1H, *J* = 9.0 Hz), 6.43 (d, 1H, *J* = 8.0 Hz, Ar-H), 6.83-6.88 (m, 2H, Ar-H), 6.93-6.95 (m, 2H, Ar-H), 6.98 (td, 1H, *J* = 1.3 & 7.7 Hz, Ar-H), 7.08 (d, 1H, *J* = 2.0 Hz, Ar-H), 7.52 (d, 1H, *J* = 9.0 Hz, Ar-H), 8.05 (d, 1H, *J* = 7.5 Hz, Ar-H), 10.42 (NH) (s, 1H). <sup>13</sup>C NMR (125 MHz, DMSO-*d*<sub>6</sub>)  $\delta_{\text{C}}$ : 15.21 (CH<sub>3</sub>), 34.86 (N-CH<sub>3</sub>), 43.92 (C-4), 55.94 (O-CH<sub>3</sub>), 60.49 (C-5), 63.06 (C-3), 64.24 (O-CH<sub>2</sub>), 72.98 (C-2), 109.73, 112.45, 113.72, 120.06, 122.26, 123.74, 126.39, 126.92, 129.05, 129.71, 134.09, 141.78, 142.54, 147.45, 149.50, 149.86, 179.10 (C=O), 197.37 (C=O). HRMS (ESI, m/z): [M+H]<sup>+</sup> Calcd. for C<sub>28</sub>H<sub>28</sub>N<sub>3</sub>O<sub>6</sub> 502.1978; Found 502.1977.

4'-(4-ethoxy-3-methoxyphenyl)-1'-methyl-3'-(4-methylbenzoyl)spiro[indoline-3,2'-pyrrolidin]-2-one (**4f**)

White solid. Yield: 80%. M.p. 71-73 °C. FT-IR (KBr, cm<sup>-1</sup>)  $\nu_{\max}$ : 3294 (NH), 1712 (C=O), 1680 (C=O). <sup>1</sup>H NMR (500 MHz, DMSO-*d*<sub>6</sub>)  $\delta_{\text{H}}$ : 1.28 (CH<sub>3</sub>) (t, 3H, *J* = 7.0 Hz), 2.06 (N-CH<sub>3</sub>) (s, 3H), 3.37 (H-5) (t, 1H, *J* = 8.0 Hz), 3.42 (H-5) (t, 1H, *J* = 9.3 Hz), 3.94 (O-CH<sub>2</sub>) (q, 2H, *J* = 7.0 Hz), 3.75 (O-CH<sub>3</sub>) (s, 3H), 4.28-4.33 (H-4) (m, 1H), 4.40 (H-3) (d, 1H, *J* = 9.5 Hz), 6.51 (d, 1H, *J* = 7.5 Hz, Ar-H), 6.82 (td, 1H, *J* = 1.0 & 7.5 Hz, Ar-H), 6.87 (d, 2H, *J* = 4.5 Hz, Ar-H), 6.95 (d, 1H, *J* = 7.5 Hz, Ar-H), 6.99 (td, 1H, *J* = 1.2 & 7.7 Hz, Ar-H), 7.02 (d, 1H, *J* = 1.5 Hz, Ar-H), 7.07 (d, 2H, *J* = 8.0 Hz, Ar-H), 7.31 (d, 2H, *J* = 8.5 Hz, Ar-H), 10.48 (NH) (s, 1H). <sup>13</sup>C NMR (125 MHz, DMSO-*d*<sub>6</sub>)  $\delta_{\text{C}}$ : 15.23 (CH<sub>3</sub>), 21.45 (CH<sub>3</sub>), 34.92 (N-CH<sub>3</sub>), 44.38 (C-4), 55.93 (O-CH<sub>3</sub>), 60.29 (C-5), 61.78 (C-3), 64.22 (O-CH<sub>2</sub>), 73.19 (C-2), 109.56, 112.36, 113.76, 119.88, 122.05, 126.68, 127.31, 127.82, 129.39, 129.42, 134.37, 134.83, 142.53, 143.89, 147.34, 149.45, 179.55 (C=O), 197.12 (C=O). HRMS (ESI, m/z): [M+H]<sup>+</sup> Calcd. for C<sub>29</sub>H<sub>31</sub>N<sub>2</sub>O<sub>4</sub> 471.2284; Found 471.2286.

2'-benzoyl-1'-(4-ethoxy-3-methoxyphenyl)-1',2',5',6',7',7a'-hexahydrospiro[indoline-3,3'-pyrrolizin]-2-one (**5a**)

White solid. Yield: 80%. M.p. 107-109 °C. FT-IR (KBr,  $\text{cm}^{-1}$ )  $\nu_{\text{max}}$ : 3203 (NH), 1718 (C=O), 1680 (C=O).  $^1\text{H}$  NMR (500 MHz,  $\text{DMSO-}d_6$ )  $\delta_{\text{H}}$ : 1.27 (CH<sub>3</sub>) (t, 3H,  $J = 7.0$  Hz), 1.68-1.77 (H-6) (m, 2H), 1.85-1.89 (H-7) (m, 2H), 2.33-2.37 (H-8) (m, 1H), 2.57-2.61 (H-8) (m, 1H), 3.78 (O-CH<sub>3</sub>) (s, 3H), 3.83 (H-4) (t, 1H,  $J = 10.8$  Hz), 3.94 (O-CH<sub>2</sub> & H-3) (q, 3H,  $J = 7.0$  Hz), 4.84 (H-5) (d, 1H,  $J = 11.5$  Hz), 6.54 (d, 1H,  $J = 7.5$  Hz, Ar-H), 6.87 (d, 1H,  $J = 8.0$  Hz, Ar-H), 6.91-6.96 (m, 2H, Ar-H), 7.04 (d, 1H,  $J = 2.0$  Hz, Ar-H), 7.07-7.10 (m, 1H, Ar-H), 7.24 (d, 1H,  $J = 7.5$  Hz, Ar-H), 7.29 (t, 2H,  $J = 7.8$  Hz, Ar-H), 7.41 (d, 2H,  $J = 7.0$  Hz, Ar-H), 7.46 (t, 1H,  $J = 7.3$  Hz, Ar-H), 10.22 (NH) (s, 1H).  $^{13}\text{C}$  NMR (125 MHz,  $\text{DMSO-}d_6$ )  $\delta_{\text{C}}$ : 15.26 (CH<sub>3</sub>), 27.11 (C-7), 30.06 (C-6), 48.03 (C-4), 52.55 (C-8), 55.95 (O-CH<sub>3</sub>), 63.38 (C-3), 64.17 (O-CH<sub>2</sub>), 71.76 (C-5), 72.98 (C-2), 110.01, 112.23, 113.71, 119.90, 121.45, 125.33, 127.85, 127.92, 128.78, 129.62, 132.91, 133.51, 137.29, 142.40, 147.36, 149.42, 179.90 (C=O), 197.37 (C=O). HRMS (ESI,  $m/z$ ):  $[\text{M}+\text{H}]^+$  Calcd. for  $\text{C}_{30}\text{H}_{31}\text{N}_2\text{O}_4$  483.2284; Found 483.2288.

1'-(4-ethoxy-3-methoxyphenyl)-2'-(4-fluorobenzoyl)-1',2',5',6',7',7a'-hexahydrospiro[indoline-3,3'-pyrrolizin]-2-one (**5b**)

White solid. Yield: 93%. M.p. 102-104 °C. FT-IR (KBr,  $\text{cm}^{-1}$ )  $\nu_{\text{max}}$ : 3196 (NH), 1720 (C=O), 1683 (C=O).  $^1\text{H}$  NMR (500 MHz,  $\text{DMSO-}d_6$ )  $\delta_{\text{H}}$ : 1.27 (CH<sub>3</sub>) (t, 3H,  $J = 7.0$  Hz), 1.67-1.77 (H-6) (m, 2H), 1.83-1.89 (H-7) (m, 2H), 2.33-2.37 (H-8) (m, 1H), 2.54-2.59 (H-8) (m, 1H), 3.79 (O-CH<sub>3</sub>) (s, 3H), 3.82 (H-4) (d, 1H,  $J = 11.0$  Hz), 3.94 (O-CH<sub>2</sub> & H-3) (q, 3H,  $J = 6.8$  Hz), 4.82 (H-5) (d, 1H,  $J = 11.5$  Hz), 6.56 (d, 1H,  $J = 8.0$  Hz, Ar-H), 6.86 (d, 1H,  $J = 8.5$  Hz, Ar-H), 6.91-6.97 (m, 2H, Ar-H), 7.05 (d, 1H,  $J = 1.5$  Hz, Ar-H), 7.08-7.13 (m, 3H, Ar-H), 7.23 (d, 1H,  $J = 7.5$  Hz, Ar-H), 7.46-7.48 (m, 2H, Ar-H), 10.22 (NH) (s, 1H).  $^{13}\text{C}$  NMR (125 MHz,  $\text{DMSO-}d_6$ )  $\delta_{\text{C}}$ : 15.23 (CH<sub>3</sub>), 27.17 (C-7), 30.14 (C-6), 47.98 (C-4), 52.40 (C-8), 55.96 (O-CH<sub>3</sub>), 63.57 (C-3), 64.19 (O-CH<sub>2</sub>), 71.84 (C-5), 73.05 (C-2), 110.05, 112.27, 113.72, 115.79 (d,  $J_{\text{CF}} = 22.5$  Hz), 119.97, 121.51, 125.24, 127.77, 129.68, 130.89 (d,  $J_{\text{CF}} = 8.8$  Hz), 132.83, 134.05, 142.35, 147.39, 149.46, 164.27, 166.27, 179.86 (C=O), 196.01 (C=O). HRMS (ESI,  $m/z$ ):  $[\text{M}+\text{H}]^+$  Calcd. for  $\text{C}_{30}\text{H}_{30}\text{FN}_2\text{O}_4$  501.2190; Found 501.2183.

2'-(4-chlorobenzoyl)-1'-(4-ethoxy-3-methoxyphenyl)-1',2',5',6',7',7a'-hexahydrospiro[indoline-3,3'-pyrrolizin]-2-one (**5c**)

White solid. Yield: 90%. M.p. 154-156 °C. FT-IR (KBr,  $\text{cm}^{-1}$ )  $\nu_{\text{max}}$ : 3155 (NH), 1716 (C=O), 1680 (C=O).  $^1\text{H}$  NMR (500 MHz,  $\text{DMSO-}d_6$ )  $\delta_{\text{H}}$ : 1.28 (CH<sub>3</sub>) (t, 3H,  $J = 7.0$  Hz), 1.69-1.77 (H-6) (m, 2H), 1.84-1.89 (H-7) (m, 2H), 2.33-2.37 (H-8) (m, 1H), 2.55-2.57 (H-8) (m, 1H), 3.79 (O-CH<sub>3</sub>) (s, 3H), 3.81 (H-4) (d, 1H,  $J = 11.5$  Hz), 3.94 (O-CH<sub>2</sub> & H-3) (q, 3H,  $J = 7.0$  Hz), 4.80 (H-5) (d, 1H,  $J = 11.5$  Hz), 6.54 (d, 1H,  $J = 7.5$  Hz, Ar-H), 6.86 (d, 1H,  $J = 8.5$  Hz, Ar-H), 6.92-6.96 (m, 2H, Ar-H), 7.04 (d, 1H,  $J = 2.0$  Hz, Ar-H), 7.09-7.12 (m, 1H, Ar-H), 7.23 (d, 1H,  $J = 7.5$  Hz, Ar-H), 7.37 (s, 4H, Ar-H), 10.23 (NH) (s, 1H).  $^{13}\text{C}$  NMR (125 MHz,  $\text{DMSO-}d_6$ )  $\delta_{\text{C}}$ : 15.28 (CH<sub>3</sub>), 27.22 (C-7), 30.14 (C-6), 47.99 (C-4), 52.55 (C-8), 55.93 (O-CH<sub>3</sub>), 63.54 (C-3), 64.11 (O-CH<sub>2</sub>), 71.93 (C-5), 73.02 (C-2), 110.06, 112.13, 113.57, 119.92, 121.55, 125.13, 127.77, 128.92, 129.79, 132.69, 135.95, 138.45, 142.31, 147.33, 149.35, 179.72 (C=O), 196.53 (C=O). HRMS (ESI,  $m/z$ ):  $[\text{M}+\text{H}]^+$  Calcd. for  $\text{C}_{30}\text{H}_{30}\text{ClN}_2\text{O}_4$  517.1894; Found 517.1895.

2'-(4-bromobenzoyl)-1'-(4-ethoxy-3-methoxyphenyl)-1',2',5',6',7',7a'-hexahydrospiro[indoline-3,3'-pyrrolizin]-2-one (**5d**)

White solid. Yield: 88%. M.p. 164-166 °C. FT-IR (KBr,  $\text{cm}^{-1}$ )  $\nu_{\text{max}}$ : 3153 (NH), 1712 (C=O), 1678 (C=O).  $^1\text{H}$  NMR (500 MHz,  $\text{DMSO-}d_6$ )  $\delta_{\text{H}}$ : 1.28 (CH<sub>3</sub>) (t, 3H,  $J = 7.0$  Hz), 1.69-1.76 (H-6) (m, 2H), 1.85-1.89 (H-7) (m, 2H), 2.33-2.37 (H-8) (m, 1H), 2.55 (H-8) (t, 1H,  $J = 8.3$  Hz), 3.79 (O-CH<sub>3</sub>) (s, 3H), 3.81 (H-4) (d, 1H,  $J = 11.0$  Hz), 3.94 (O-CH<sub>2</sub> & H-3) (q, 3H,  $J = 7.0$  Hz), 4.80 (H-3) (d, 1H,  $J = 11.5$  Hz), 6.55 (d, 1H,  $J = 8.0$  Hz, Ar-H), 6.86 (d, 1H,  $J = 8.0$  Hz, Ar-H), 6.91-6.95 (m, 2H, Ar-H), 7.04 (s, 1H, Ar-H), 7.11 (t, 1H,  $J = 7.8$  Hz, Ar-H), 7.23 (d, 1H,  $J = 7.5$  Hz, Ar-H), 7.29 (d, 2H,  $J = 8.5$  Hz, Ar-H), 7.50 (d, 2H,  $J = 8.5$  Hz, Ar-H), 10.22 (NH) (s, 1H).  $^{13}\text{C}$  NMR (125 MHz,  $\text{DMSO-}d_6$ )  $\delta_{\text{C}}$ : 15.27 (CH<sub>3</sub>), 27.20 (C-7), 30.14 (C-6), 47.98 (C-4), 52.28 (C-8), 55.96 (O-CH<sub>3</sub>), 63.52 (C-3), 64.16 (O-CH<sub>2</sub>), 71.90 (C-5), 73.01 (C-2), 110.08, 112.19, 113.65, 119.94, 121.55, 125.14, 127.67, 127.77, 129.77, 129.87, 131.86, 132.71, 136.28, 142.32, 147.36, 149.40, 179.73 (C=O), 196.71 (C=O). HRMS (ESI,  $m/z$ ):  $[\text{M}+\text{H}]^+$  Calcd. for  $\text{C}_{30}\text{H}_{30}\text{BrN}_2\text{O}_4$  561.1389; Found 561.1385.

1'-(4-ethoxy-3-methoxyphenyl)-2'-(4-nitrobenzoyl)-1',2',5',6',7',7a'-hexahydrospiro[indoline-3,3'-pyrrolizin]-2-one (**5e**)

White solid. Yield: 76%. M.p. 117-119 °C. FT-IR (KBr,  $\text{cm}^{-1}$ )  $\nu_{\text{max}}$ : 3160 (NH), 1716 (C=O), 1604 (C=O).  $^1\text{H}$  NMR (500 MHz,  $\text{DMSO-}d_6$ )  $\delta_{\text{H}}$ : 1.29 (CH<sub>3</sub>) (t, 3H,  $J = 7.0$  Hz), 1.68-1.78 (H-6) (m, 2H), 1.84-1.89 (H-7) (m, 2H), 2.33-2.37 (H-8) (m, 1H), 2.52-2.55 (H-8) (m, 1H), 3.78 (H-4) (d, 1H,  $J = 10.0$  Hz), 3.81 (O-CH<sub>3</sub>) (s, 3H), 3.89-3.92 (H-3) (m, 1H), 3.96 (O-CH<sub>2</sub>) (q, 3H,  $J = 7.0$  Hz), 4.90 (H-5) (d, 1H,  $J = 11.5$  Hz), 6.49 (d, 1H,  $J = 7.5$  Hz, Ar-H), 6.88 (d, 1H,

$J = 8.5$  Hz, Ar-H), 6.96-7.00 (m, 2H, Ar-H), 7.08 (d, 1H,  $J = 2.0$  Hz, Ar-H), 7.11-7.14 (m, 1H, Ar-H), 7.25 (d, 1H,  $J = 7.5$  Hz, Ar-H), 7.50 (d, 2H,  $J = 9.0$  Hz, Ar-H), 8.10 (d, 2H,  $J = 9.0$  Hz, Ar-H), 10.10 (NH) (s, 1H).  $^{13}\text{C}$  NMR (125 MHz, DMSO- $d_6$ )  $\delta_{\text{C}}$ : 15.27 (CH<sub>3</sub>), 27.26 (C-7), 30.19 (C-6), 47.94 (C-4), 52.03 (C-8), 55.99 (O-CH<sub>3</sub>), 64.16 (C-3), 64.49 (O-CH<sub>2</sub>), 72.13 (C-5), 72.94 (C-2), 110.22, 112.22, 113.63, 120.05, 121.71, 123.76, 124.97, 127.64, 129.29, 129.98, 132.55, 142.10, 142.36, 147.40, 149.42, 150.03, 179.54 (C=O), 197.31 (C=O). HRMS (ESI,  $m/z$ ):  $[\text{M}+\text{H}]^+$  Calcd. for C<sub>30</sub>H<sub>30</sub>N<sub>3</sub>O<sub>6</sub> 528.2135; Found 528.2133.

1'-(4-ethoxy-3-methoxyphenyl)-2'-(4-methylbenzoyl)-1',2',5',6',7',7a'-hexahydrospiro[indoline-3,3'-pyrrolizin]-2-one (**5f**)

White solid. Yield: 85%. M.p. 146-148 °C. FT-IR (KBr, cm<sup>-1</sup>)  $\nu_{\text{max}}$ : 3158 (NH), 1716 (C=O), 1676 (C=O).  $^1\text{H}$  NMR (500 MHz, DMSO- $d_6$ )  $\delta_{\text{H}}$ : 1.28 (CH<sub>3</sub>) (t, 3H,  $J = 7.0$  Hz), 1.68-1.77 (H-6) (m, 2H), 1.85-1.89 (H-7) (m, 2H), 2.26 (CH<sub>3</sub>) (s, 3H), 2.32-2.36 (H-8) (m, 1H), 2.54-2.59 (H-8) (m, 1H), 3.77 (O-CH<sub>3</sub>) (s, 3H), 3.82 (H-4) (t, 1H,  $J = 10.8$  Hz), 3.94 (O-CH<sub>2</sub> & H-3) (q, 3H,  $J = 7.0$  Hz), 4.80 (H-5) (d, 1H,  $J = 11.5$  Hz), 6.55 (d, 1H,  $J = 7.5$  Hz, Ar-H), 6.86 (d, 1H,  $J = 8.5$  Hz, Ar-H), 6.90-6.93 (m, 2H, Ar-H), 7.01 (d, 1H,  $J = 1.5$  Hz, Ar-H), 7.07-7.12 (m, 3H, Ar-H), 7.24 (d, 1H,  $J = 7.5$  Hz, Ar-H), 7.34 (d, 2H,  $J = 8.0$  Hz, Ar-H), 10.24 (NH) (s, 1H).  $^{13}\text{C}$  NMR (125 MHz, DMSO- $d_6$ )  $\delta_{\text{C}}$ : 15.28 (CH<sub>3</sub>), 21.51 (CH<sub>3</sub>), 27.17 (C-7), 30.09 (C-6), 48.02 (C-4), 52.56 (C-8), 55.90 (O-CH<sub>3</sub>), 62.96 (C-3), 64.10 (O-CH<sub>2</sub>), 71.77 (C-5), 73.06 (C-2), 109.99, 112.09, 113.57, 119.81, 121.44, 125.33, 127.94, 128.12, 129.42, 129.61, 132.86, 134.80, 142.32, 143.97, 147.28, 149.32, 179.87 (C=O), 196.59 (C=O). HRMS (ESI,  $m/z$ ):  $[\text{M}+\text{H}]^+$  Calcd. for C<sub>31</sub>H<sub>33</sub>N<sub>2</sub>O<sub>4</sub> 497.2440; Found 497.2442.

6'-benzoyl-7'-(4-ethoxy-3-methoxyphenyl)-1',6',7',7a'-tetrahydro-3'H-spiro[indoline-3,5'-pyrrolo[1,2-c]thiazol]-2-one (**6a**)

White solid. Yield: 75%. M.p. 202-204 °C. FT-IR (KBr, cm<sup>-1</sup>)  $\nu_{\text{max}}$ : 3311 (NH), 1728 (C=O), 1676 (C=O).  $^1\text{H}$  NMR (500 MHz, DMSO- $d_6$ )  $\delta_{\text{H}}$ : 1.28 (CH<sub>3</sub>) (t, 3H,  $J = 7.0$  Hz), 3.04 (H-6) (d, 2H,  $J = 4.5$  Hz), 3.34 (H-8) (d, 1H,  $J = 10.0$  Hz), 3.72 (H-8) (d, 1H,  $J = 10.0$  Hz), 3.81 (O-CH<sub>3</sub>) (s, 3H), 3.82-3.87 (H-4) (m, 1H), 3.95 (O-CH<sub>2</sub>) (q, 2H,  $J = 7.0$  Hz), 4.14-4.18 (H-3) (m, 1H), 4.80 (H-5) (d, 1H,  $J = 11.5$  Hz), 6.52 (d, 1H,  $J = 8.0$  Hz, Ar-H), 6.89 (d, 1H,  $J = 8.5$  Hz, Ar-H), 6.94 (t, 1H,  $J = 7.8$  Hz, Ar-H), 7.02 (dd, 1H,  $J = 2.0$  & 8.0 Hz, Ar-H), 7.09 (d, 1H,  $J = 2.0$  Hz, Ar-H), 7.10-7.13 (m, 1H, Ar-H), 7.29 (t, 2H,  $J = 8.0$  Hz, Ar-H), 7.38 (d, 2H,  $J = 7.5$  Hz, Ar-H), 7.43 (d, 1H,  $J = 7.5$  Hz, Ar-H), 7.48 (t, 1H,  $J = 7.5$  Hz, Ar-H), 10.31 (NH) (s, 1H).  $^{13}\text{C}$  NMR (125 MHz, DMSO- $d_6$ )  $\delta_{\text{C}}$ : 15.25 (CH<sub>3</sub>), 36.36 (C-6), 51.20 (C-4), 53.90 (C-8), 56.01 (O-



CH<sub>3</sub>), 61.81 (C-3), 64.17 (O-CH<sub>2</sub>), 73.80 (C-2), 74.86 (C-5), 109.98, 110.07, 112.38, 113.66, 120.35, 121.43, 123.35, 128.45, 128.90, 129.79, 130.28, 132.00, 135.77, 138.58, 142.47, 147.64, 149.49, 178.70 (C=O), 95.95 (C=O). HRMS (ESI, m/z): [M+H]<sup>+</sup> Calcd. for C<sub>29</sub>H<sub>29</sub>N<sub>2</sub>O<sub>4</sub>S 501.1848; Found 501.1849.

7'-(4-ethoxy-3-methoxyphenyl)-6'-(4-fluorobenzoyl)-1',6',7',7a'-tetrahydro-3'H-spiro[indoline-3,5'-pyrrolo[1,2-c]thiazol]-2-one (**6b**)

White solid. Yield: 90%. M.p. 207-209 °C. FT-IR (KBr, cm<sup>-1</sup>)  $\nu_{\max}$ : 3321 (NH), 1722 (C=O), 1678 (C=O). <sup>1</sup>H NMR (500MHz, DMSO-*d*<sub>6</sub>)  $\delta_{\text{H}}$ : 1.29 (CH<sub>3</sub>) (t, 3H, *J* = 7.0 Hz), 3.03 (H-6) (d, 2H, *J* = 4.5 Hz), 3.34 (H-8) (d, 1H, *J* = 10.0 Hz), 3.72 (H-8) (d, 1H, *J* = 10.0 Hz), 3.80 (H-4) (d, 1H, *J* = 2.0 Hz), 3.81 (O-CH<sub>3</sub>) (s, 3H), 3.96 (O-CH<sub>2</sub>) (q, 2H, *J* = 6.8 Hz), 4.11-4.15 (H-3) (m, 1H), 4.76 (H-5) (d, 1H, *J* = 11.5 Hz), 6.52 (d, 1H, *J* = 7.5 Hz, Ar-H), 6.89 (d, 1H, *J* = 8.5 Hz, Ar-H), 6.94 (t, 1H, *J* = 7.8 Hz, Ar-H), 7.01 (dd, 1H, *J* = 2.0 & 8.0 Hz, Ar-H), 7.08 (d, 1H, *J* = 7.08 Hz, Ar-H), 7.11-7.14 (m, 3H, Ar-H), 7.41-7.44 (m, 3H, Ar-H), 10.30 (NH) (s, 1H). <sup>13</sup>C NMR (125 MHz, DMSO-*d*<sub>6</sub>)  $\delta_{\text{C}}$ : 15.26 (CH<sub>3</sub>), 36.35 (C-6), 51.08 (C-4), 54.01 (C-8), 56.02 (O-CH<sub>3</sub>), 61.90 (C-3), 64.17 (O-CH<sub>2</sub>), 73.88 (C-2), 74.89 (C-5), 109.95, 112.37, 113.66, 115.83 (d, *J*<sub>CF</sub> = 22.5 Hz), 120.34, 121.40, 123.41, 128.47, 130.23, 130.93 (d, *J*<sub>CF</sub> = 10.0 Hz), 132.05, 133.82, 133.84, 142.46, 147.62, 149.48, 164.33, 166.34, 178.79 (C=O), 195.43 (C=O). HRMS (ESI, m/z): [M+H]<sup>+</sup> Calcd. for C<sub>29</sub>H<sub>28</sub>FN<sub>2</sub>O<sub>4</sub>S 519.1754; Found 519.1744.

6'-(4-chlorobenzoyl)-7'-(4-ethoxy-3-methoxyphenyl)-1',6',7',7a'-tetrahydro-3'H-spiro[indoline-3,5'-pyrrolo[1,2-c]thiazol]-2-one (**6c**)

White solid. Yield: 89%. M.p. 195-197 °C. FT-IR (KBr, cm<sup>-1</sup>)  $\nu_{\max}$ : 3319 (NH), 1726 (C=O), 1674 (C=O). <sup>1</sup>H NMR (500 MHz, DMSO-*d*<sub>6</sub>)  $\delta_{\text{H}}$ : 1.29 (CH<sub>3</sub>) (t, 3H, *J* = 7.0 Hz), 3.03 (H-6) (d, 2H, *J* = 5.0 Hz), 3.32 (H-8) (s, 1H), 3.71 (H-8) (d, 1H, *J* = 10.0 Hz), 3.80 (H-4) (d, 1H, *J* = 2.0 Hz), 3.82 (O-CH<sub>3</sub>) (s, 3H), 3.96 (O-CH<sub>2</sub>) (q, 2H, *J* = 6.8 & 13.8 Hz), 4.11-4.15 (H-3) (m, 1H), 4.75 (H-5) (d, 1H, *J* = 11.5 Hz), 6.53 (d, 1H, *J* = 7.5 Hz, Ar-H), 6.89 (d, 1H, *J* = 8.0 Hz, Ar-H), 6.92-6.96 (m, 1H, Ar-H), 7.01 (dd, 1H, *J* = 1.8 & 8.3 Hz, Ar-H), 7.08 (d, 1H, *J* = 1.5 Hz, Ar-H), 7.12-7.15 (m, 1H, Ar-H), 7.33-7.38 (m, 4H, Ar-H), 7.42 (d, 1H, *J* = 7.5 Hz, Ar-H), 10.31 (NH) (s, 1H). <sup>13</sup>C NMR (125 MHz, DMSO-*d*<sub>6</sub>)  $\delta_{\text{C}}$ : 15.26 (CH<sub>3</sub>), 36.36 (C-6), 51.02 (C-4), 54.02 (C-8), 56.03 (O-CH<sub>3</sub>), 61.96 (C-3), 64.17 (O-CH<sub>2</sub>), 73.84 (C-2), 74.92 (C-5), 109.98, 110.07, 112.38, 113.66, 120.35, 121.43, 123.35, 128.45, 128.90, 129.79, 130.28, 132.00, 135.77, 138.58, 142.47, 147.64, 149.49, 178.70 (C=O), 195.95 (C=O). HRMS (ESI, m/z): [M+H]<sup>+</sup> Calcd. for C<sub>29</sub>H<sub>28</sub>ClN<sub>2</sub>O<sub>4</sub>S 535.1458; Found 535.1450.

6'-(4-bromobenzoyl)-7'-(4-ethoxy-3-methoxyphenyl)-1',6',7',7a'-tetrahydro-3'H-spiro[indoline-3,5'-pyrrolo[1,2-c]thiazol]-2-one (**6d**)

White solid. Yield: 83%. M.p. 179-181 °C. FT-IR (KBr,  $\text{cm}^{-1}$ )  $\nu_{\text{max}}$ : 3317 (NH), 1728 (C=O), 1674 (C=O).  $^1\text{H}$  NMR (500 MHz,  $\text{DMSO-}d_6$ )  $\delta_{\text{H}}$ : 1.28 ( $\text{CH}_3$ ) (t, 3H,  $J = 7.0$  Hz), 3.03 (H-6) (d, 2H,  $J = 4.5$  Hz), 3.34 (H-8) (d, 1H,  $J = 10.0$  Hz), 3.72 (H-8) (d, 1H,  $J = 10.5$  Hz), 3.80 (H-4) (d, 1H,  $J = 2.0$  Hz), 3.82 (O- $\text{CH}_3$ ) (s, 3H), 3.95 (O- $\text{CH}_2$ ) (q, 2H,  $J = 7.0$  & 14.0 Hz), 4.11-4.15 (H-3) (m, 1H), 4.75 (H-5) (d, 1H,  $J = 12.0$  Hz), 6.53 (d, 1H,  $J = 7.5$  Hz, Ar-H), 6.89 (d, 1H,  $J = 8.5$  Hz, Ar-H), 6.94 (t, 1H,  $J = 7.5$  Hz, Ar-H), 7.01 (dd, 1H,  $J = 2.0$  & 8.5 Hz, Ar-H), 7.08 (d, 1H,  $J = 2.0$  Hz, Ar-H), 7.12-7.15 (m, 1H, Ar-H), 7.26 (d, 2H,  $J = 8.5$  Hz, Ar-H), 7.42 (d, 1H,  $J = 7.5$  Hz, Ar-H), 7.51 (d, 2H,  $J = 8.5$  Hz, Ar-H), 10.32 (NH) (s, 1H).  $^{13}\text{C}$  NMR (125 MHz,  $\text{DMSO-}d_6$ )  $\delta_{\text{C}}$ : 15.27 ( $\text{CH}_3$ ), 36.37 (C-6), 51.03 (C-4), 54.04 (C-8), 56.03 (O- $\text{CH}_3$ ), 61.92 (C-3), 64.17 (O- $\text{CH}_2$ ), 73.84 (C-2), 74.92 (C-5), 109.99, 112.37, 113.65, 120.35, 121.43, 123.34, 127.80, 128.47, 129.88, 130.29, 131.85, 131.98, 136.09, 142.48, 147.64, 149.49, 178.69 (C=O), 196.14 (C=O). HRMS (ESI,  $m/z$ ):  $[\text{M}+\text{H}]^+$  Calcd. for  $\text{C}_{29}\text{H}_{28}\text{BrN}_2\text{O}_4\text{S}$  579.0953; Found 579.0937.

7'-(4-ethoxy-3-methoxyphenyl)-6'-(4-nitrobenzoyl)-1',6',7',7a'-tetrahydro-3'H-spiro[indoline-3,5'-pyrrolo[1,2-c]thiazol]-2-one (**6e**)

White solid. Yield: 78%. M.p. 119-121 °C. FT-IR (KBr,  $\text{cm}^{-1}$ )  $\nu_{\text{max}}$ : 3263 (NH), 1724 (C=O), 1606 (C=O).  $^1\text{H}$  NMR (500 MHz,  $\text{DMSO-}d_6$ )  $\delta_{\text{H}}$ : 1.30 ( $\text{CH}_3$ ) (t, 3H,  $J = 7.0$  Hz), 3.05 (H-6) (d, 2H,  $J = 5.0$  Hz), 3.32 (H-8) (s, 1H), 3.72 (H-8) (d, 1H,  $J = 10.5$  Hz), 3.78 (H-4) (t, 1H,  $J = 10.5$  Hz), 3.84 (O- $\text{CH}_3$ ) (s, 3H), 3.98 (O- $\text{CH}_2$ ) (q, 2H,  $J = 6.8$  Hz), 4.10-4.14 (H-3) (m, 1H), 4.84 (H-5) (d, 1H,  $J = 11.5$  Hz), 6.47 (d, 1H,  $J = 8.0$  Hz, Ar-H), 6.91 (d, 1H,  $J = 8.0$  Hz, Ar-H), 6.98 (t, 1H,  $J = 7.5$  Hz, Ar-H), 7.06 (dd, 1H,  $J = 1.5$  & 8.5 Hz, Ar-H), 7.13 (d, 1H,  $J = 2.0$  Hz, Ar-H), 7.16 (t, 1H,  $J = 7.5$  Hz, Ar-H), 7.43 (d, 1H,  $J = 7.5$  Hz, Ar-H), 7.46 (d, 2H,  $J = 8.5$  Hz, Ar-H), 8.11 (d, 2H,  $J = 8.5$  Hz, Ar-H), 10.21 (NH) (s, 1H).  $^{13}\text{C}$  NMR (125 MHz,  $\text{DMSO-}d_6$ )  $\delta_{\text{C}}$ : 15.28 ( $\text{CH}_3$ ), 36.39 (C-6), 50.87 (C-4), 54.21 (C-8), 56.04 (O- $\text{CH}_3$ ), 62.75 (C-3), 64.15 (O- $\text{CH}_2$ ), 73.78 (C-2), 75.06 (C-5), 110.15, 112.37, 113.59, 120.48, 121.58, 123.17, 123.76, 128.34, 129.31, 130.53, 131.82, 141.91, 142.53, 147.66, 149.48, 150.09, 178.50 (C=O), 196.89 (C=O). HRMS (ESI,  $m/z$ ):  $[\text{M}+\text{H}]^+$  Calcd. for  $\text{C}_{29}\text{H}_{28}\text{N}_3\text{O}_6\text{S}$  546.1699; Found 546.1696.

7'-(4-ethoxy-3-methoxyphenyl)-6'-(4-methylbenzoyl)-1',6',7',7a'-tetrahydro-3'H-spiro[indoline-3,5'-pyrrolo[1,2-c]thiazol]-2-one (**6f**)

White solid. Yield: 80%. M.p. 200-202 °C. FT-IR (KBr,  $\text{cm}^{-1}$ )  $\nu_{\text{max}}$ : 3319 (NH), 1726 (C=O), 1668 (C=O).  $^1\text{H}$  NMR (500 MHz,  $\text{DMSO-}d_6$ )  $\delta_{\text{H}}$ : 1.28 ( $\text{CH}_3$ ) (t, 3H,  $J = 7.0$  Hz), 2.27 ( $\text{CH}_3$ ) (s, 3H), 3.03 (H-6) (d, 2H,  $J = 4.5$  Hz), 3.33 (H-8) (d, 1H,  $J = 10.5$  Hz), 3.72 (H-8) (d, 1H,  $J = 10.5$  Hz), 3.80 (O- $\text{CH}_3$ ) (s, 3H), 3.84 (H-4) (d, 1H,  $J = 11.5$  Hz), 3.95 (O- $\text{CH}_2$ ) (q, 2H,  $J = 7.0$  & 14.0 Hz), 4.12-4.15 (H-3) (m, 1H), 4.75 (H-5) (d, 1H,  $J = 11.5$  Hz), 6.53 (d, 1H,  $J = 8.0$  Hz, Ar-H), 6.88 (d, 1H,  $J = 8.5$  Hz, Ar-H), 6.93 (t, 1H,  $J = 7.5$  Hz, Ar-H), 6.98 (dd, 1H,  $J = 1.5$  & 8.5 Hz, Ar-H), 7.06 (d, 1H,  $J = 1.5$  Hz, Ar-H), 7.12 (t, 3H,  $J = 8.3$  Hz, Ar-H), 7.32 (d, 2H,  $J = 8.5$  Hz, Ar-H), 7.43 (d, 1H,  $J = 7.5$  Hz, Ar-H), 10.32 (NH) (s, 1H).  $^{13}\text{C}$  NMR (125 MHz,  $\text{DMSO-}d_6$ )  $\delta_{\text{C}}$ : 15.26 ( $\text{CH}_3$ ), 21.52 ( $\text{CH}_3$ ), 36.34 (C-6), 51.26 (C-4), 53.90 (C-8), 56.01 (O- $\text{CH}_3$ ), 61.44 (C-3), 64.16 (O- $\text{CH}_2$ ), 73.89 (C-2), 74.83 (C-5), 109.90, 112.34, 113.67, 120.22, 121.31, 123.54, 128.14, 128.62, 129.41, 130.09, 132.16, 134.62, 142.45, 144.09, 147.60, 149.46, 178.85 (C=O), 195.90 (C=O). HRMS (ESI, m/z):  $[\text{M}+\text{H}]^+$  Calcd. for  $\text{C}_{30}\text{H}_{31}\text{N}_2\text{O}_4\text{S}$  515.2005; Found 515.1998.

### ***In silico* studies**

#### **Preparation of ligands, protein targets and molecular docking studies**

The structures of BCL2, Caspase 3, and FAS respectively elucidated by X-Ray crystallography (PDB ID: 2W3L, PDB ID: 3GJQ and PDB ID: 3TJM) were obtained from the Protein Data Bank (PDB). The protein targets were prepared according to the previous reports<sup>2,3</sup> using Auto dock Tools 1.5.7. Further, the prediction of the binding site was carried out according to the reported procedure<sup>2</sup>. The docking was site specific, the key amino acids of the 3 targets were obtained from the reports<sup>4-6</sup>. The grid box measuring 40 Å × 40 Å × 40 Å containing the binding pocket and the attributes of the active site was positioned at x = 39.805667 Å, y = 26.935452 Å, and z = -12.414476 Å; x = 40.609477 Å, y = 33.891182 Å and z = 58.019750 Å; x = 1.959955 Å, y = 63.600591 Å and z = 53.006000 Å for BCL2, Caspase 3 and FAS, respectively. During ligand preparation, phytochemical structures, and 5-fluorouracil (standard drug) were sketched using Chem sketch and prepared for the molecular docking studies. Molecular docking studies was carried out using Auto Dock Tools 1.5.7<sup>2</sup>. After minimizing the energy, ligand molecules were stored in the same directory as the protein molecule using the PDBQT format to perform the docking simulation studies. Using a command-line programme called Auto Dock Vina 1.1.2, which disrupts and navigates the ligands into the target site using the Brayden-Fletcher-Goldfarb-Shanno (BGFS) algorithm and evaluates the scoring function of each ligand conformation, the compounds were virtually

screened<sup>7,8</sup>. During the entire docking simulation, ligands remained flexible but proteins were expected to be rigid due to the huge number of torsions permitted during ligand synthesis. Though 10 degrees were permitted for ligand molecules, the first binding poses among ten poses which was created with zero atomic position root-mean-square deviation (RMSD) are the most authentic. Indicating a more efficient binding, it also possesses the highest binding affinity of any location. Biovia Discovery Studio Visualizer 2021, an open-source GUI for visualizing data, was used to complete the visualization of the molecular docking studies. Combining the total number of hydrogen bonds, total number of intermolecular bonds, and binding affinity, the amount of ligand interaction was calculated. The co-crystal ligands (CCLs) of the targets i.e. 2W3L (DRO1166) & 3TJM (7FA500) were removed from their respective protein and redocked with the respective proteins according to the above-mentioned procedure. Whereas 3GJQ (tripeptide Trp-Glu-His-Asp with acetyl group) was docked using Schrodinger Suite. The RMSD of the co-crystal ligand within the complex and the re-docked co-crystal ligands were also determined using Discovery Studio 2021 visualization software which validated the docking procedure with respect to co-crystal ligand.

### **Molecular dynamics simulation studies and calculation of free energy**

Protein targets complexed with the lead ligands & 5-fluorouracil as standard after docking were selected for the molecular dynamics (MD) simulation. The MD simulation studies were performed using GROMACS-2018.1, a biomolecular software package. The CHARMM36 was used as the force field to approximate the ligand structures, and the ligand topology was constructed using Swiss Param server. Conversely, the CHARMM36 forcefield was also used to add protein structure using the pdb2gmx module<sup>9</sup>. The next stage was to use the steepest descent technique to minimize energy in a vacuum over 5000 steps. Each protein complex was spaced 10 Å from the borders of the box. With the appropriate number of Na<sup>+</sup> and Cl<sup>-</sup> counterions, the solvent was added to the TIP3P water model to maintain the required 0.15 M salt concentration. Five simulations in all were done at 310 K temperature and 1 bar pressure for 100 ns. The trajectory analysis of the solvent accessible surface area (SASA), ligand hydrogen bond parameters, radius of gyration (Rg), root-mean-square deviation (RMSD), and root-mean-square fluctuation (RMSF) was carried out, and the findings were shown in the graphical manner employing a GUI based software known as XM GRACE for plotting the outcomes of MD simulation studies.

Using the Molecular Mechanics/Poisson-Boltzmann Surface Area (MM-PBSA) approach, binding free energy calculations were performed using protein-ligand complex outcomes along with standard drug 5-fluorouracil obtained from MD simulation studies. The degree of ligand binding to protein can also be assessed using thermodynamics and molecular dynamics simulations. Molecular mechanical energy, polar and apolar solvation energies, and molecular mechanical energy are the three components used in the `g_mmpbsa` programme with `MmPbSaStat.py` script was used to calculate the binding free energy for each ligand-protein combination<sup>10,11</sup>. The programme used the GROMACS 2018.1 trajectories as input. Using dt 1000 frames, the computation of  $\Delta G$  is performed by considering the MD trajectories of the previous 50 ns.

$$\Delta G_{\text{binding}} = G_{\text{complex}} - (G_{\text{protein}} + G_{\text{Ligand}}) \quad (1)$$

$$\Delta G = \Delta E_{\text{MM}} + \Delta G_{\text{Solvation}} - T\Delta S = \Delta E_{\text{(bonded + non-bonded)}} + \Delta G_{\text{(Polar + non-polar)}} - T\Delta S \quad (2)$$

$G_{\text{Binding}}$ : binding free energy,  $G_{\text{complex}}$ : total free energy of the protein-ligand complex,  $G_{\text{Protein}}$  and  $G_{\text{Ligand}}$ : total free energies of the isolated protein and ligand in solvent, respectively,  $\Delta G$ : standard free energy,  $\Delta E_{\text{MM}}$ : average molecular mechanics potential energy in vacuum,  $G_{\text{Solvation}}$ : solvation energy,  $\Delta E$ : total energy of bonded as well as non-bonded interactions,  $\Delta S$ : change in entropy of the system upon ligand binding,  $T$ : Temperature in Kelvin.

### **Determination of anti-proliferative potential (cytotoxicity) by SRB assay**

The anti-proliferative activity (cytotoxicity) of the compounds (4, 5 and 6 series) were determined according to the previous study<sup>12</sup>. MDA-MB-468 (breast cancer cell line) and HCT 15 (Colorectal cancer cell line) were suspended in 100  $\mu\text{L}$  of DMEM (Dulbecco's Modified Eagle Medium) with 10% FBS (Fetal Bovine Serum) and then seeded into a 96-well plate with a cell density of  $1 \times 10^4$  cells per well in 100  $\mu\text{L}$  of media. These cells were then incubated at 37°C with 5%  $\text{CO}_2$  and 90% relative humidity overnight. To test the effects of compounds on these cells, a stock solution of 100 mM of compound **6f** was prepared using 100% cell culture-grade DMSO (Dimethyl Sulfoxide). A 2x working stock of 1 mM compounds was prepared by diluting the 100 mM compounds stock with DMEM containing 10% FBS. It is important to note that the final concentration of DMSO in the working stock was 0.5%. Various concentrations of compound **6f** were prepared by serial dilution using DMEM. The cells were then treated with increasing concentrations of compounds (62.5, 125, 250, 500 and 1000  $\mu\text{M}$ ) with respect to MDA-MB-468 cells, whereas the HCT 15 cells were treated with increasing

concentrations of compounds (62.5, 125, 250, 500, 1000 and 2000  $\mu\text{M}$ ) with respect to different durations of 24, 48, and 72 h. Inhibition percentage of cell proliferation was assessed using a Sulforhodamine-B (SRB) assay. The percentage inhibition of cell proliferation was calculated using the following formula:

$$\% \text{ inhibition of cell proliferation} = (\text{Absorbance of Control} - \text{Absorbance of Sample}) / (\text{Absorbance of Control}) \times 100$$

The experiments were performed in triplicates, and each concentration was tested with at least four replicates to ensure the reliability of the results.

### **Cell death assay by acridine orange and Ethidium bromide staining**

Cell death due to the treatment of compounds was evaluated through a process involving the dual staining of cells with acridine orange (AO) and ethidium bromide (EtBr)<sup>12</sup>. MDA-MB-468 and HCT 15 cells were grown in 6-well plates at a cell density of  $0.3 \times 10^6$  cells in 2.0 mL of medium per well and allowed to grow for approximately 36 hrs. After this initial growth period, the cells were exposed to varying concentrations of compounds (250, 500 and 1000  $\mu\text{M}$  with respect to MDA-MB-468 cells and 500, 1000 and 2000  $\mu\text{M}$  with respect to HCT 15 cells) and control solution consisting of 0.5% DMSO for a duration of 48 hrs. Subsequently, the cells were treated with trypsin to create a single-cell suspension. The neutralization of trypsin was with the addition of the complete medium. A 20  $\mu\text{L}$  cell suspension was transferred to a separate 1.5 mL microcentrifuge tube, incubated with a mixture of EtBr (100  $\mu\text{M}$ ) and acridine orange (100  $\mu\text{M}$ ) for 5.0 minutes. The stained cells were mounted on slides and observed using a fluorescence microscope (Olympus U-CMAD3) equipped with fluorescein isothiocyanate (FITC) and tetramethyl-rhodamine isothiocyanate (TRITC) probes. The stained images were created by merging both live and dead cells. Cells with green colour (live cells) and cells with orange colour (dead cells) were analyzed.

### **Effect of 4,5 and 6 series compounds on cell cycle**

The effect of 4,5 and 6 series compounds on cell cycle was conducted according to the study<sup>13</sup>. MDA-MB-468 and HCT 15 cells, at a concentration of  $2 \times 10^5$  cells per 2 mL per well,

were cultured in a 6-well plate. These cells were then subjected to treatment with compounds at concentrations of 50, 100, and 200  $\mu\text{M}$ . Further, they were treated with DMSO (control) for a duration of 48 hrs. Following the duration of incubation, the culture media were removed, and the cells were washed with PBS (Phosphate-Buffered Saline). Subsequently, the cells were trypsinized, and the resultant cell suspension was subjected to centrifugation at  $300\times g$  for 5 minutes at  $25\text{ }^{\circ}\text{C}$ . The cells were then fixed by being exposed to 1 mL of cold 70% ethanol for 30 minutes while kept on ice. After centrifugation, the cell pellet was treated with 50  $\mu\text{L}$  of Ribonuclease-A (RNase A) at a concentration of 100  $\mu\text{M}$  for 4 hrs. The treated cell suspension was then mixed with 400  $\mu\text{L}$  of propidium iodide (PI) solution at a stock concentration of 50  $\mu\text{M}$  per  $10^6$  cells, and this mixture was allowed to incubate for 10 minutes at room temperature. The distribution of the cell cycle was analyzed using flow cytometry equipment (BD FACS Calibur model: 343202-FACSCALIBUR 4 CLR, BD Biosciences, San Jose, CA, USA), equipped with three filters (GFP-515/15, YFP-540/20BP, RFP-610/20BP). Cell analysis was performed using Cell quest pro v.6.0 software.

### **Assay for Caspase 3 enzyme activity**

MDA-MB-468 and HCT 15 cells were cultivated in a 6-well plate at a density of  $5 \times 10^5$  cells/ 2 mL and were then incubated for a whole night at  $37^{\circ}\text{C}$  in a  $\text{CO}_2$  incubator. The medium that the cells were using was aspirated, and the cells were treated with the necessary concentrations of experimental compounds (62.5-1000  $\mu\text{M}$  for MDA-MB-468 cells and 62.5-2000  $\mu\text{M}$  for HCT 15 cells) in 2 mL of culture medium. The cells were then incubated for 24 hours at  $37^{\circ}\text{C}$ . After the treatment was completed, the medium was removed from each well and cleaned with PBS. After removing the PBS, a hazardous agent at a concentration of 23 $\mu\text{M}$  was added, and the mixture was incubated for 24 hours at  $37^{\circ}\text{C}$ . After the treatment, the medium was aspirated from each well and washed with PBS. 200  $\mu\text{L}$  of trypsin-EDTA solution was added, and the mixture was incubated for 3–4 minutes at  $37\text{ }^{\circ}\text{C}$ . Next, 2 mL of culture medium was added, and the cells were harvested directly into 12 x 75 mm polystyrene tubes. The tubes were centrifuged for 5 minutes at  $300 \times g$  at  $25\text{ }^{\circ}\text{C}$ . The pellet was fixed in 1 mL of cold 70% ethanol, added dropwise to the cell pellet while vortexing to ensure fixation of all cells and reduce clumping. Finally, the mixture was incubated for 30 minutes in a  $-20^{\circ}\text{C}$  freezer.

The cells were pelleted at a faster rate than living cells for five minutes, aspirated the supernatant carefully without losing the pellet (Note that ethanol-fixed cells require higher

centrifugal speeds to pellet compared to unfixed cells since they become more buoyant upon fixation). Washed the pellet twice with PBS and 10  $\mu$ L of Anti-Caspase-3/7 antibody was

| Cell line | Groups      | % Inhibition of cell proliferation |                              |                              |
|-----------|-------------|------------------------------------|------------------------------|------------------------------|
|           |             | 24 hrs                             | 48 hrs                       | 72 hrs                       |
|           | Normal cell | 0.25 $\pm$ 0.01 <sup>a</sup>       | 0.35 $\pm$ 0.08 <sup>a</sup> | 0.39 $\pm$ 0.10 <sup>a</sup> |

added. Mixed thoroughly and incubated for 30 minutes in the dark at room temperature (20 to 25°C). 500  $\mu$ L of D-PBS was added and mixed thoroughly and analyzed the cells by FACS on FL1 channel<sup>14-16</sup>.

### Statistical analysis

All the experiments were performed in triplicates. Results were expressed as the mean  $\pm$  standard deviation calculated using Graph Pad Prism version 8.1. Duncan's multiple tests were used to calculate "p" value. A "p" value of  $\leq 0.05$  was considered as significant.



|               |                              |                           |                           |                           |
|---------------|------------------------------|---------------------------|---------------------------|---------------------------|
|               | Control                      | 0.56 ± 0.04 <sup>a</sup>  | 0.58 ± 0.04 <sup>a</sup>  | 0.58 ± 0.04 <sup>a</sup>  |
|               | VC DMSO                      | 5.31 ± 0.24 <sup>b</sup>  | 5.37 ± 0.29 <sup>b</sup>  | 5.40 ± 0.29 <sup>b</sup>  |
|               | 5 fluorouracil (100 µM)      | 89.27 ± 1.02 <sup>g</sup> | 92.25 ± 0.98 <sup>g</sup> | 94.47 ± 0.85 <sup>g</sup> |
|               | Compound <b>6f</b> (62.5 µM) | 13.45 ± 0.06 <sup>c</sup> | 14.12 ± 0.17 <sup>c</sup> | 17.38 ± 0.25 <sup>c</sup> |
|               | Compound <b>6f</b> (125 µM)  | 24.65 ± 0.26 <sup>d</sup> | 26.59 ± 0.31 <sup>d</sup> | 29.54 ± 0.21 <sup>d</sup> |
|               | Compound <b>6f</b> (250 µM)  | 46.71 ± 0.50 <sup>e</sup> | 48.63 ± 0.27 <sup>e</sup> | 50.25 ± 0.28 <sup>e</sup> |
|               | Compound <b>6f</b> (500 µM)  | 69.83 ± 1.50 <sup>f</sup> | 71.15 ± 0.45 <sup>f</sup> | 73.14 ± 1.01 <sup>f</sup> |
|               | Compound <b>6f</b> (1000 µM) | 90.32 ± 0.91 <sup>g</sup> | 92.54 ± 0.65 <sup>g</sup> | 94.66 ± 0.79 <sup>g</sup> |
| <b>HCT 15</b> | Normal cell                  | 0.37 ± 0.05 <sup>a</sup>  | 0.40 ± 0.04 <sup>a</sup>  | 0.42 ± 0.06 <sup>a</sup>  |
|               | Control                      | 0.58 ± 0.01 <sup>a</sup>  | 0.6 ± 0.07 <sup>a</sup>   | 0.61 ± 0.09 <sup>a</sup>  |
|               | VC DMSO                      | 5.35 ± 0.16 <sup>b</sup>  | 5.45 ± 0.12 <sup>b</sup>  | 5.75 ± 0.15 <sup>b</sup>  |
|               | 5 fluorouracil (100 µM)      | 89.72 ± 0.53 <sup>h</sup> | 91.25 ± 0.76 <sup>h</sup> | 94.45 ± 0.34 <sup>h</sup> |
|               | Compound <b>6f</b> (62.5 µM) | 17.56 ± 0.45 <sup>c</sup> | 19.25 ± 0.17 <sup>c</sup> | 22.15 ± 0.24 <sup>c</sup> |
|               | Compound <b>6f</b> (125 µM)  | 25.73 ± 0.32 <sup>d</sup> | 28.64 ± 0.41 <sup>d</sup> | 31.24 ± 0.55 <sup>d</sup> |
|               | Compound <b>6f</b> (250 µM)  | 47.70 ± 0.22 <sup>e</sup> | 50.24 ± 0.51 <sup>e</sup> | 54.47 ± 0.27 <sup>e</sup> |
|               | Compound <b>6f</b> (500 µM)  | 66.57 ± 0.93 <sup>f</sup> | 68.75 ± 0.67 <sup>f</sup> | 71.45 ± 0.55 <sup>f</sup> |
|               | Compound <b>6f</b> (1000 µM) | 72.91 ± 0.26 <sup>g</sup> | 75.14 ± 0.47 <sup>g</sup> | 79.14 ± 0.44 <sup>g</sup> |
|               | Compound <b>6f</b> (2000 µM) | 91.87 ± 0.31 <sup>i</sup> | 94.57 ± 0.51 <sup>i</sup> | 95.15 ± 0.24 <sup>i</sup> |

**Table S1.** Anti-proliferative (Cytotoxicity) of Compound **6f** and other compounds against MDA-MB-468 cell line and HCT 15 cell line.

*Values are expressed as mean ± SD. Means in the same column with distinct superscripts are significantly different ( $p \leq 0.05$ ) as separated by the Duncan multiple range test*

| Cell line          | Compounds          | Concentration ( $\mu\text{M}$ ) | % Inhibition of cell proliferation |                               |                               |
|--------------------|--------------------|---------------------------------|------------------------------------|-------------------------------|-------------------------------|
|                    |                    |                                 | 24 hrs                             | 48 hrs                        | 72 hrs                        |
| MDA-MB-468         | 4a                 | 62.5 $\mu\text{M}$              | 3.47 $\pm$ 0.06 <sup>a</sup>       | 6.12 $\pm$ 0.17 <sup>a</sup>  | 8.38 $\pm$ 0.25 <sup>a</sup>  |
|                    |                    | 125 $\mu\text{M}$               | 9.65 $\pm$ 0.26 <sup>b</sup>       | 10.59 $\pm$ 0.31 <sup>b</sup> | 12.54 $\pm$ 0.21 <sup>b</sup> |
|                    |                    | 250 $\mu\text{M}$               | 14.71 $\pm$ 0.5 <sup>c</sup>       | 16.63 $\pm$ 0.28 <sup>c</sup> | 17.25 $\pm$ 0.28 <sup>c</sup> |
|                    |                    | 500 $\mu\text{M}$               | 18.83 $\pm$ 1.50 <sup>d</sup>      | 21.15 $\pm$ 0.49 <sup>d</sup> | 23.14 $\pm$ 1.05 <sup>d</sup> |
|                    |                    | 1000 $\mu\text{M}$              | 20.32 $\pm$ 0.91 <sup>e</sup>      | 22.54 $\pm$ 0.65 <sup>e</sup> | 25.66 $\pm$ 0.79 <sup>e</sup> |
|                    | 4b                 | 62.5 $\mu\text{M}$              | 4.45 $\pm$ 0.30 <sup>a</sup>       | 5.12 $\pm$ 0.17 <sup>a</sup>  | 7.38 $\pm$ 0.25 <sup>a</sup>  |
|                    |                    | 125 $\mu\text{M}$               | 10.60 $\pm$ 0.26 <sup>b</sup>      | 11.57 $\pm$ 0.31 <sup>b</sup> | 12.60 $\pm$ 0.21 <sup>b</sup> |
|                    |                    | 250 $\mu\text{M}$               | 14.91 $\pm$ 0.50 <sup>c</sup>      | 17.63 $\pm$ 0.28 <sup>c</sup> | 19.48 $\pm$ 0.28 <sup>c</sup> |
|                    |                    | 500 $\mu\text{M}$               | 20.83 $\pm$ 1.50 <sup>d</sup>      | 22.65 $\pm$ 0.49 <sup>d</sup> | 25.44 $\pm$ 1.05 <sup>d</sup> |
|                    |                    | 1000 $\mu\text{M}$              | 27.32 $\pm$ 0.91 <sup>e</sup>      | 32.54 $\pm$ 0.65 <sup>e</sup> | 33.68 $\pm$ 0.79 <sup>e</sup> |
|                    | 4c                 | 62.5 $\mu\text{M}$              | 8.45 $\pm$ 0.30 <sup>a</sup>       | 8.92 $\pm$ 0.17 <sup>a</sup>  | 9.38 $\pm$ 0.25 <sup>a</sup>  |
|                    |                    | 125 $\mu\text{M}$               | 11.60 $\pm$ 0.2 <sup>b</sup>       | 12.57 $\pm$ 0.31 <sup>b</sup> | 13.90 $\pm$ 0.21 <sup>b</sup> |
|                    |                    | 250 $\mu\text{M}$               | 15.91 $\pm$ 0.50 <sup>c</sup>      | 19.63 $\pm$ 0.28 <sup>c</sup> | 22.48 $\pm$ 0.28 <sup>c</sup> |
|                    |                    | 500 $\mu\text{M}$               | 23.83 $\pm$ 1.50 <sup>d</sup>      | 25.65 $\pm$ 0.49 <sup>d</sup> | 29.44 $\pm$ 1.05 <sup>d</sup> |
|                    |                    | 1000 $\mu\text{M}$              | 32.32 $\pm$ 0.91 <sup>e</sup>      | 35.54 $\pm$ 0.65 <sup>e</sup> | 38.68 $\pm$ 0.79 <sup>e</sup> |
|                    | 4d                 | 62.5 $\mu\text{M}$              | 10.45 $\pm$ 0.30 <sup>a</sup>      | 12.92 $\pm$ 0.17 <sup>a</sup> | 14.38 $\pm$ 0.25 <sup>a</sup> |
|                    |                    | 125 $\mu\text{M}$               | 15.60 $\pm$ 0.26 <sup>b</sup>      | 17.57 $\pm$ 0.31 <sup>b</sup> | 20.90 $\pm$ 0.21 <sup>b</sup> |
|                    |                    | 250 $\mu\text{M}$               | 22.91 $\pm$ 0.50 <sup>c</sup>      | 24.63 $\pm$ 0.28 <sup>c</sup> | 27.48 $\pm$ 0.28 <sup>c</sup> |
|                    |                    | 500 $\mu\text{M}$               | 30.83 $\pm$ 1.50 <sup>d</sup>      | 33.65 $\pm$ 0.49 <sup>d</sup> | 37.44 $\pm$ 1.05 <sup>d</sup> |
|                    |                    | 1000 $\mu\text{M}$              | 40.32 $\pm$ 0.91 <sup>e</sup>      | 42.54 $\pm$ 0.65 <sup>e</sup> | 45.68 $\pm$ 0.79 <sup>e</sup> |
|                    | 4e                 | 62.5 $\mu\text{M}$              | 12.45 $\pm$ 0.30 <sup>a</sup>      | 14.85 $\pm$ 0.17 <sup>a</sup> | 16.83 $\pm$ 0.25 <sup>a</sup> |
|                    |                    | 125 $\mu\text{M}$               | 18.80 $\pm$ 0.26 <sup>b</sup>      | 20.75 $\pm$ 0.31 <sup>b</sup> | 22.68 $\pm$ 0.21 <sup>b</sup> |
|                    |                    | 250 $\mu\text{M}$               | 24.91 $\pm$ 0.50 <sup>c</sup>      | 26.68 $\pm$ 0.28 <sup>c</sup> | 29.84 $\pm$ 0.28 <sup>c</sup> |
|                    |                    | 500 $\mu\text{M}$               | 32.83 $\pm$ 1.50 <sup>d</sup>      | 34.56 $\pm$ 0.49 <sup>d</sup> | 38.50 $\pm$ 1.05 <sup>d</sup> |
|                    |                    | 1000 $\mu\text{M}$              | 42.42 $\pm$ 0.91 <sup>e</sup>      | 44.84 $\pm$ 0.65 <sup>e</sup> | 46.68 $\pm$ 0.79 <sup>e</sup> |
|                    | 4f                 | 62.5 $\mu\text{M}$              | 12.95 $\pm$ 0.30 <sup>a</sup>      | 15.85 $\pm$ 0.17 <sup>a</sup> | 17.93 $\pm$ 0.25 <sup>a</sup> |
|                    |                    | 125 $\mu\text{M}$               | 19.80 $\pm$ 0.26 <sup>b</sup>      | 21.75 $\pm$ 0.31 <sup>b</sup> | 23.98 $\pm$ 0.21 <sup>b</sup> |
|                    |                    | 250 $\mu\text{M}$               | 25.11 $\pm$ 0.50 <sup>c</sup>      | 27.00 $\pm$ 0.28 <sup>c</sup> | 30.84 $\pm$ 0.28 <sup>c</sup> |
|                    |                    | 500 $\mu\text{M}$               | 33.83 $\pm$ 1.50 <sup>d</sup>      | 35.58 $\pm$ 0.49 <sup>d</sup> | 39.50 $\pm$ 1.05 <sup>d</sup> |
|                    |                    | 1000 $\mu\text{M}$              | 43.72 $\pm$ 0.91 <sup>e</sup>      | 45.92 $\pm$ 0.65 <sup>e</sup> | 47.68 $\pm$ 0.79 <sup>e</sup> |
|                    | 5a                 | 62.5 $\mu\text{M}$              | 15.90 $\pm$ 0.30 <sup>a</sup>      | 19.85 $\pm$ 0.17 <sup>a</sup> | 22.93 $\pm$ 0.25 <sup>a</sup> |
|                    |                    | 125 $\mu\text{M}$               | 20.80 $\pm$ 0.26 <sup>b</sup>      | 23.78 $\pm$ 0.31 <sup>b</sup> | 26.00 $\pm$ 0.21 <sup>b</sup> |
|                    |                    | 250 $\mu\text{M}$               | 27.15 $\pm$ 0.50 <sup>c</sup>      | 28.45 $\pm$ 0.28 <sup>c</sup> | 32.72 $\pm$ 0.28 <sup>c</sup> |
|                    |                    | 500 $\mu\text{M}$               | 35.83 $\pm$ 1.50 <sup>d</sup>      | 37.58 $\pm$ 0.49 <sup>d</sup> | 42.50 $\pm$ 1.05 <sup>d</sup> |
|                    |                    | 1000 $\mu\text{M}$              | 44.72 $\pm$ 0.91 <sup>e</sup>      | 47.92 $\pm$ 0.65 <sup>e</sup> | 49.78 $\pm$ 0.79 <sup>e</sup> |
|                    | 5b                 | 62.5 $\mu\text{M}$              | 17.90 $\pm$ 0.30 <sup>a</sup>      | 20.85 $\pm$ 0.17 <sup>a</sup> | 23.48 $\pm$ 0.25 <sup>a</sup> |
|                    |                    | 125 $\mu\text{M}$               | 21.92 $\pm$ 0.26 <sup>b</sup>      | 24.88 $\pm$ 0.31 <sup>b</sup> | 27.45 $\pm$ 0.21 <sup>b</sup> |
|                    |                    | 250 $\mu\text{M}$               | 29.29 $\pm$ 0.50 <sup>c</sup>      | 32.45 $\pm$ 0.28 <sup>c</sup> | 34.72 $\pm$ 0.28 <sup>c</sup> |
|                    |                    | 500 $\mu\text{M}$               | 37.83 $\pm$ 1.50 <sup>d</sup>      | 40.58 $\pm$ 0.49 <sup>d</sup> | 43.90 $\pm$ 1.05 <sup>d</sup> |
|                    |                    | 1000 $\mu\text{M}$              | 46.46 $\pm$ 0.91 <sup>e</sup>      | 48.92 $\pm$ 0.65 <sup>e</sup> | 51.78 $\pm$ 0.79 <sup>e</sup> |
|                    | 5c                 | 62.5 $\mu\text{M}$              | 19.90 $\pm$ 0.30 <sup>a</sup>      | 22.85 $\pm$ 0.17 <sup>a</sup> | 25.48 $\pm$ 0.25 <sup>a</sup> |
|                    |                    | 125 $\mu\text{M}$               | 25.92 $\pm$ 0.26 <sup>b</sup>      | 28.88 $\pm$ 0.31 <sup>b</sup> | 30.45 $\pm$ 0.21 <sup>b</sup> |
| 250 $\mu\text{M}$  |                    | 35.29 $\pm$ 0.50 <sup>c</sup>   | 36.45 $\pm$ 0.28 <sup>c</sup>      | 38.72 $\pm$ 0.28 <sup>c</sup> |                               |
| 500 $\mu\text{M}$  |                    | 42.83 $\pm$ 1.50 <sup>d</sup>   | 44.58 $\pm$ 0.49 <sup>d</sup>      | 47.90 $\pm$ 1.05 <sup>d</sup> |                               |
| 1000 $\mu\text{M}$ |                    | 49.57 $\pm$ 0.91 <sup>e</sup>   | 52.96 $\pm$ 0.65 <sup>e</sup>      | 54.88 $\pm$ 0.79 <sup>e</sup> |                               |
| 5d                 | 62.5 $\mu\text{M}$ | 20.94 $\pm$ 0.30 <sup>a</sup>   | 23.85 $\pm$ 0.17 <sup>a</sup>      | 26.68 $\pm$ 0.25 <sup>a</sup> |                               |
|                    | 125 $\mu\text{M}$  | 27.95 $\pm$ 0.26 <sup>b</sup>   | 29.89 $\pm$ 0.31 <sup>b</sup>      | 32.45 $\pm$ 0.21 <sup>b</sup> |                               |

|  |    |              |                               |                               |                               |
|--|----|--------------|-------------------------------|-------------------------------|-------------------------------|
|  |    | 250 $\mu$ M  | 36.73 $\pm$ 0.50 <sup>c</sup> | 38.45 $\pm$ 0.28 <sup>c</sup> | 40.92 $\pm$ 0.28 <sup>c</sup> |
|  |    | 500 $\mu$ M  | 44.83 $\pm$ 1.50 <sup>d</sup> | 46.58 $\pm$ 0.49 <sup>d</sup> | 49.90 $\pm$ 1.05 <sup>d</sup> |
|  |    | 1000 $\mu$ M | 52.78 $\pm$ 0.91 <sup>e</sup> | 54.76 $\pm$ 0.65 <sup>e</sup> | 56.94 $\pm$ 0.79 <sup>e</sup> |
|  | 5e | 62.5 $\mu$ M | 22.48 $\pm$ 0.30 <sup>a</sup> | 24.85 $\pm$ 0.17 <sup>a</sup> | 27.79 $\pm$ 0.25 <sup>a</sup> |
|  |    | 125 $\mu$ M  | 29.95 $\pm$ 0.26 <sup>b</sup> | 30.89 $\pm$ 0.31 <sup>b</sup> | 33.45 $\pm$ 0.21 <sup>b</sup> |
|  |    | 250 $\mu$ M  | 38.73 $\pm$ 0.50 <sup>c</sup> | 39.45 $\pm$ 0.28 <sup>c</sup> | 42.92 $\pm$ 0.28 <sup>c</sup> |
|  |    | 500 $\mu$ M  | 45.88 $\pm$ 1.50 <sup>d</sup> | 47.58 $\pm$ 0.49 <sup>d</sup> | 52.94 $\pm$ 1.05 <sup>d</sup> |
|  |    | 1000 $\mu$ M | 53.65 $\pm$ 0.91 <sup>e</sup> | 55.76 $\pm$ 0.65 <sup>e</sup> | 58.94 $\pm$ 0.79 <sup>e</sup> |
|  | 5f | 62.5 $\mu$ M | 24.48 $\pm$ 0.30 <sup>a</sup> | 26.85 $\pm$ 0.17 <sup>a</sup> | 29.98 $\pm$ 0.25 <sup>a</sup> |
|  |    | 125 $\mu$ M  | 32.95 $\pm$ 0.26 <sup>b</sup> | 33.90 $\pm$ 0.31 <sup>b</sup> | 36.45 $\pm$ 0.21 <sup>b</sup> |
|  |    | 250 $\mu$ M  | 39.79 $\pm$ 0.50 <sup>c</sup> | 42.45 $\pm$ 0.28 <sup>c</sup> | 44.95 $\pm$ 0.28 <sup>c</sup> |
|  |    | 500 $\mu$ M  | 46.80 $\pm$ 1.50 <sup>d</sup> | 49.58 $\pm$ 0.49 <sup>d</sup> | 55.94 $\pm$ 1.05 <sup>d</sup> |
|  |    | 1000 $\mu$ M | 54.69 $\pm$ 0.91 <sup>e</sup> | 56.79 $\pm$ 0.65 <sup>e</sup> | 59.95 $\pm$ 0.79 <sup>e</sup> |
|  | 6a | 62.5 $\mu$ M | 11.45 $\pm$ 0.06 <sup>a</sup> | 12.17 $\pm$ 0.17 <sup>a</sup> | 14.45 $\pm$ 0.25 <sup>a</sup> |
|  |    | 125 $\mu$ M  | 20.65 $\pm$ 0.26 <sup>b</sup> | 23.59 $\pm$ 0.31 <sup>b</sup> | 27.60 $\pm$ 0.21 <sup>b</sup> |
|  |    | 250 $\mu$ M  | 38.75 $\pm$ 0.50 <sup>c</sup> | 45.65 $\pm$ 0.27 <sup>c</sup> | 48.89 $\pm$ 0.28 <sup>c</sup> |
|  |    | 500 $\mu$ M  | 60.83 $\pm$ 1.5 <sup>d</sup>  | 65.15 $\pm$ 0.45 <sup>d</sup> | 68.17 $\pm$ 1.01 <sup>d</sup> |
|  |    | 1000 $\mu$ M | 72.32 $\pm$ 0.91 <sup>e</sup> | 76.54 $\pm$ 0.65 <sup>e</sup> | 78.64 $\pm$ 0.79 <sup>e</sup> |
|  | 6b | 62.5 $\mu$ M | 9.37 $\pm$ 0.06 <sup>a</sup>  | 10.17 $\pm$ 0.17 <sup>a</sup> | 12.33 $\pm$ 0.25 <sup>a</sup> |
|  |    | 125 $\mu$ M  | 18.55 $\pm$ 0.26 <sup>b</sup> | 20.54 $\pm$ 0.31 <sup>b</sup> | 23.67 $\pm$ 0.21 <sup>b</sup> |
|  |    | 250 $\mu$ M  | 35.26 $\pm$ 0.50 <sup>c</sup> | 42.63 $\pm$ 0.27 <sup>c</sup> | 45.80 $\pm$ 0.28 <sup>c</sup> |
|  |    | 500 $\mu$ M  | 58.80 $\pm$ 1.50 <sup>d</sup> | 62.32 $\pm$ 0.45 <sup>d</sup> | 67.21 $\pm$ 1.01 <sup>d</sup> |
|  |    | 1000 $\mu$ M | 70.12 $\pm$ 0.91 <sup>e</sup> | 73.47 $\pm$ 0.65 <sup>e</sup> | 75.33 $\pm$ 0.79 <sup>e</sup> |
|  | 6c | 62.5 $\mu$ M | 7.38 $\pm$ 0.06 <sup>a</sup>  | 9.19 $\pm$ 0.17 <sup>a</sup>  | 10.20 $\pm$ 0.25 <sup>a</sup> |
|  |    | 125 $\mu$ M  | 16.55 $\pm$ 0.26 <sup>b</sup> | 18.32 $\pm$ 0.31 <sup>b</sup> | 20.47 $\pm$ 0.21 <sup>b</sup> |
|  |    | 250 $\mu$ M  | 32.46 $\pm$ 0.50 <sup>c</sup> | 40.60 $\pm$ 0.27 <sup>c</sup> | 42.84 $\pm$ 0.28 <sup>c</sup> |
|  |    | 500 $\mu$ M  | 54.80 $\pm$ 1.50 <sup>d</sup> | 60.32 $\pm$ 0.45 <sup>d</sup> | 64.21 $\pm$ 1.01 <sup>d</sup> |
|  |    | 1000 $\mu$ M | 68.20 $\pm$ 0.91 <sup>e</sup> | 70.40 $\pm$ 0.65 <sup>e</sup> | 72.42 $\pm$ 0.79 <sup>e</sup> |
|  | 6d | 62.5 $\mu$ M | 10.48 $\pm$ 0.06 <sup>a</sup> | 12.19 $\pm$ 0.17 <sup>a</sup> | 14.38 $\pm$ 0.25 <sup>a</sup> |
|  |    | 125 $\mu$ M  | 22.65 $\pm$ 0.27 <sup>b</sup> | 25.59 $\pm$ 0.31 <sup>b</sup> | 27.44 $\pm$ 0.21 <sup>b</sup> |
|  |    | 250 $\mu$ M  | 43.71 $\pm$ 0.50 <sup>c</sup> | 46.63 $\pm$ 0.27 <sup>c</sup> | 50.28 $\pm$ 0.28 <sup>c</sup> |
|  |    | 500 $\mu$ M  | 68.83 $\pm$ 1.50 <sup>d</sup> | 72.45 $\pm$ 0.45 <sup>d</sup> | 74.17 $\pm$ 1.01 <sup>d</sup> |
|  |    | 1000 $\mu$ M | 85.32 $\pm$ 0.91 <sup>e</sup> | 88.47 $\pm$ 0.65 <sup>e</sup> | 90.42 $\pm$ 0.79 <sup>e</sup> |
|  | 6e | 62.5 $\mu$ M | 12.40 $\pm$ 0.06 <sup>a</sup> | 13.17 $\pm$ 0.17 <sup>a</sup> | 18.78 $\pm$ 0.25 <sup>a</sup> |
|  |    | 125 $\mu$ M  | 25.63 $\pm$ 0.26 <sup>b</sup> | 26.59 $\pm$ 0.31 <sup>b</sup> | 29.54 $\pm$ 0.21 <sup>b</sup> |
|  |    | 250 $\mu$ M  | 44.78 $\pm$ 0.50 <sup>c</sup> | 47.75 $\pm$ 0.27 <sup>c</sup> | 51.27 $\pm$ 0.28 <sup>c</sup> |
|  |    | 500 $\mu$ M  | 66.83 $\pm$ 1.50 <sup>d</sup> | 69.57 $\pm$ 0.45 <sup>d</sup> | 70.38 $\pm$ 1.01 <sup>d</sup> |
|  |    | 1000 $\mu$ M | 82.42 $\pm$ 0.91 <sup>e</sup> | 84.54 $\pm$ 0.65 <sup>e</sup> | 86.69 $\pm$ 0.79 <sup>e</sup> |
|  | 4a | 62.5 $\mu$ M | 7.56 $\pm$ 0.40 <sup>a</sup>  | 9.25 $\pm$ 0.12 <sup>a</sup>  | 12.15 $\pm$ 0.20 <sup>a</sup> |
|  |    | 125 $\mu$ M  | 15.73 $\pm$ 0.32 <sup>b</sup> | 18.64 $\pm$ 0.41 <sup>b</sup> | 21.24 $\pm$ 0.55 <sup>b</sup> |
|  |    | 250 $\mu$ M  | 27.70 $\pm$ 0.22 <sup>c</sup> | 30.24 $\pm$ 0.51 <sup>c</sup> | 34.75 $\pm$ 0.27 <sup>c</sup> |
|  |    | 500 $\mu$ M  | 36.55 $\pm$ 0.93 <sup>d</sup> | 38.75 $\pm$ 0.67 <sup>d</sup> | 41.45 $\pm$ 0.55 <sup>d</sup> |
|  |    | 1000 $\mu$ M | 42.91 $\pm$ 0.26 <sup>e</sup> | 45.14 $\pm$ 0.47 <sup>e</sup> | 49.14 $\pm$ 0.44 <sup>e</sup> |
|  |    | 2000 $\mu$ M | 51.87 $\pm$ 0.31 <sup>f</sup> | 54.50 $\pm$ 0.51 <sup>f</sup> | 56.17 $\pm$ 0.24 <sup>f</sup> |
|  | 4b | 62.5 $\mu$ M | 8.45 $\pm$ 0.40 <sup>a</sup>  | 10.71 $\pm$ 0.12 <sup>a</sup> | 13.19 $\pm$ 0.20 <sup>a</sup> |
|  |    | 125 $\mu$ M  | 17.73 $\pm$ 0.32 <sup>b</sup> | 19.60 $\pm$ 0.41 <sup>b</sup> | 22.27 $\pm$ 0.55 <sup>b</sup> |
|  |    | 250 $\mu$ M  | 29.72 $\pm$ 0.22 <sup>c</sup> | 32.24 $\pm$ 0.51 <sup>c</sup> | 35.78 $\pm$ 0.27 <sup>c</sup> |
|  |    | 500 $\mu$ M  | 37.59 $\pm$ 0.93 <sup>d</sup> | 39.80 $\pm$ 0.67 <sup>d</sup> | 42.47 $\pm$ 0.55 <sup>d</sup> |
|  |    | 1000 $\mu$ M | 43.95 $\pm$ 0.26 <sup>e</sup> | 46.18 $\pm$ 0.47 <sup>e</sup> | 50.19 $\pm$ 0.44 <sup>e</sup> |

|  |    |              |                               |                               |                               |
|--|----|--------------|-------------------------------|-------------------------------|-------------------------------|
|  |    | 2000 $\mu$ M | 52.64 $\pm$ 0.31 <sup>f</sup> | 54.70 $\pm$ 0.51 <sup>f</sup> | 56.57 $\pm$ 0.24 <sup>f</sup> |
|  | 4c | 62.5 $\mu$ M | 10.25 $\pm$ 0.40 <sup>a</sup> | 11.91 $\pm$ 0.12 <sup>a</sup> | 13.45 $\pm$ 0.20 <sup>a</sup> |
|  |    | 125 $\mu$ M  | 19.64 $\pm$ 0.32 <sup>b</sup> | 21.60 $\pm$ 0.41 <sup>b</sup> | 23.47 $\pm$ 0.55 <sup>b</sup> |
|  |    | 250 $\mu$ M  | 30.74 $\pm$ 0.22 <sup>c</sup> | 33.45 $\pm$ 0.51 <sup>c</sup> | 36.89 $\pm$ 0.27 <sup>c</sup> |
|  |    | 500 $\mu$ M  | 38.79 $\pm$ 0.93 <sup>d</sup> | 40.80 $\pm$ 0.67 <sup>d</sup> | 42.50 $\pm$ 0.55 <sup>d</sup> |
|  |    | 1000 $\mu$ M | 44.96 $\pm$ 0.26 <sup>e</sup> | 47.19 $\pm$ 0.47 <sup>e</sup> | 51.34 $\pm$ 0.44 <sup>e</sup> |
|  |    | 2000 $\mu$ M | 53.71 $\pm$ 0.31 <sup>f</sup> | 55.72 $\pm$ 0.51 <sup>f</sup> | 57.59 $\pm$ 0.24 <sup>f</sup> |
|  | 4d | 62.5 $\mu$ M | 12.25 $\pm$ 0.40 <sup>a</sup> | 14.92 $\pm$ 0.12 <sup>a</sup> | 15.49 $\pm$ 0.20 <sup>a</sup> |
|  |    | 125 $\mu$ M  | 20.64 $\pm$ 0.32 <sup>b</sup> | 22.60 $\pm$ 0.41 <sup>b</sup> | 24.49 $\pm$ 0.55 <sup>b</sup> |
|  |    | 250 $\mu$ M  | 31.74 $\pm$ 0.22 <sup>c</sup> | 34.49 $\pm$ 0.51 <sup>c</sup> | 37.92 $\pm$ 0.27 <sup>c</sup> |
|  |    | 500 $\mu$ M  | 39.75 $\pm$ 0.93 <sup>d</sup> | 41.82 $\pm$ 0.67 <sup>d</sup> | 43.52 $\pm$ 0.55 <sup>d</sup> |
|  |    | 1000 $\mu$ M | 45.98 $\pm$ 0.26 <sup>e</sup> | 48.22 $\pm$ 0.47 <sup>e</sup> | 52.37 $\pm$ 0.44 <sup>e</sup> |
|  |    | 2000 $\mu$ M | 54.78 $\pm$ 0.31 <sup>f</sup> | 56.79 $\pm$ 0.51 <sup>f</sup> | 58.65 $\pm$ 0.24 <sup>f</sup> |
|  | 4e | 62.5 $\mu$ M | 12.25 $\pm$ 0.40 <sup>a</sup> | 14.92 $\pm$ 0.12 <sup>a</sup> | 15.49 $\pm$ 0.20 <sup>a</sup> |
|  |    | 125 $\mu$ M  | 20.64 $\pm$ 0.32 <sup>b</sup> | 22.60 $\pm$ 0.41 <sup>b</sup> | 24.49 $\pm$ 0.55 <sup>b</sup> |
|  |    | 250 $\mu$ M  | 31.74 $\pm$ 0.22 <sup>c</sup> | 34.49 $\pm$ 0.51 <sup>c</sup> | 37.92 $\pm$ 0.27 <sup>c</sup> |
|  |    | 500 $\mu$ M  | 39.75 $\pm$ 0.93 <sup>d</sup> | 41.82 $\pm$ 0.67 <sup>d</sup> | 43.52 $\pm$ 0.55 <sup>d</sup> |
|  |    | 1000 $\mu$ M | 45.98 $\pm$ 0.26 <sup>e</sup> | 48.22 $\pm$ 0.47 <sup>e</sup> | 52.37 $\pm$ 0.44 <sup>e</sup> |
|  |    | 2000 $\mu$ M | 54.78 $\pm$ 0.31 <sup>f</sup> | 56.79 $\pm$ 0.51 <sup>f</sup> | 58.65 $\pm$ 0.24 <sup>f</sup> |
|  | 4f | 62.5 $\mu$ M | 13.25 $\pm$ 0.40 <sup>a</sup> | 15.95 $\pm$ 0.12 <sup>a</sup> | 16.79 $\pm$ 0.20 <sup>a</sup> |
|  |    | 125 $\mu$ M  | 22.64 $\pm$ 0.32 <sup>b</sup> | 24.67 $\pm$ 0.41 <sup>b</sup> | 26.55 $\pm$ 0.55 <sup>b</sup> |
|  |    | 250 $\mu$ M  | 32.74 $\pm$ 0.22 <sup>c</sup> | 35.68 $\pm$ 0.51 <sup>c</sup> | 38.94 $\pm$ 0.27 <sup>c</sup> |
|  |    | 500 $\mu$ M  | 40.75 $\pm$ 0.93 <sup>d</sup> | 42.87 $\pm$ 0.67 <sup>d</sup> | 44.59 $\pm$ 0.55 <sup>d</sup> |
|  |    | 1000 $\mu$ M | 46.90 $\pm$ 0.26 <sup>e</sup> | 48.42 $\pm$ 0.47 <sup>e</sup> | 53.77 $\pm$ 0.44 <sup>e</sup> |
|  |    | 2000 $\mu$ M | 55.79 $\pm$ 0.31 <sup>f</sup> | 57.85 $\pm$ 0.51 <sup>f</sup> | 59.69 $\pm$ 0.24 <sup>f</sup> |
|  | 5a | 62.5 $\mu$ M | 14.25 $\pm$ 0.40 <sup>a</sup> | 16.97 $\pm$ 0.12 <sup>a</sup> | 17.88 $\pm$ 0.20 <sup>a</sup> |
|  |    | 125 $\mu$ M  | 23.64 $\pm$ 0.32 <sup>b</sup> | 25.77 $\pm$ 0.41 <sup>b</sup> | 27.55 $\pm$ 0.55 <sup>b</sup> |
|  |    | 250 $\mu$ M  | 33.94 $\pm$ 0.22 <sup>c</sup> | 35.88 $\pm$ 0.51 <sup>c</sup> | 39.48 $\pm$ 0.27 <sup>c</sup> |
|  |    | 500 $\mu$ M  | 41.79 $\pm$ 0.93 <sup>d</sup> | 43.00 $\pm$ 0.67 <sup>d</sup> | 45.60 $\pm$ 0.55 <sup>d</sup> |
|  |    | 1000 $\mu$ M | 47.92 $\pm$ 0.26 <sup>e</sup> | 49.41 $\pm$ 0.47 <sup>e</sup> | 54.79 $\pm$ 0.44 <sup>e</sup> |
|  |    | 2000 $\mu$ M | 56.79 $\pm$ 0.31 <sup>f</sup> | 58.85 $\pm$ 0.51 <sup>f</sup> | 60.70 $\pm$ 0.24 <sup>f</sup> |
|  | 5b | 62.5 $\mu$ M | 15.29 $\pm$ 0.40 <sup>a</sup> | 17.97 $\pm$ 0.12 <sup>a</sup> | 19.95 $\pm$ 0.20 <sup>a</sup> |
|  |    | 125 $\mu$ M  | 24.67 $\pm$ 0.32 <sup>b</sup> | 26.79 $\pm$ 0.41 <sup>b</sup> | 28.59 $\pm$ 0.55 <sup>b</sup> |
|  |    | 250 $\mu$ M  | 34.94 $\pm$ 0.22 <sup>c</sup> | 36.89 $\pm$ 0.51 <sup>c</sup> | 39.55 $\pm$ 0.27 <sup>c</sup> |
|  |    | 500 $\mu$ M  | 42.77 $\pm$ 0.93 <sup>d</sup> | 44.68 $\pm$ 0.67 <sup>d</sup> | 46.65 $\pm$ 0.55 <sup>d</sup> |
|  |    | 1000 $\mu$ M | 48.94 $\pm$ 0.26 <sup>e</sup> | 50.47 $\pm$ 0.47 <sup>e</sup> | 53.80 $\pm$ 0.44 <sup>e</sup> |
|  |    | 2000 $\mu$ M | 55.79 $\pm$ 0.31 <sup>f</sup> | 59.89 $\pm$ 0.51 <sup>f</sup> | 61.72 $\pm$ 0.24 <sup>f</sup> |
|  | 5c | 62.5 $\mu$ M | 17.45 $\pm$ 0.40 <sup>a</sup> | 19.88 $\pm$ 0.12 <sup>a</sup> | 21.97 $\pm$ 0.20 <sup>a</sup> |
|  |    | 125 $\mu$ M  | 25.87 $\pm$ 0.32 <sup>b</sup> | 27.59 $\pm$ 0.41 <sup>b</sup> | 30.47 $\pm$ 0.55 <sup>b</sup> |
|  |    | 250 $\mu$ M  | 35.98 $\pm$ 0.22 <sup>c</sup> | 37.76 $\pm$ 0.51 <sup>c</sup> | 40.58 $\pm$ 0.27 <sup>c</sup> |
|  |    | 500 $\mu$ M  | 43.79 $\pm$ 0.93 <sup>d</sup> | 45.85 $\pm$ 0.67 <sup>d</sup> | 47.88 $\pm$ 0.55 <sup>d</sup> |
|  |    | 1000 $\mu$ M | 49.90 $\pm$ 0.26 <sup>e</sup> | 52.49 $\pm$ 0.47 <sup>e</sup> | 54.88 $\pm$ 0.44 <sup>e</sup> |
|  |    | 2000 $\mu$ M | 56.79 $\pm$ 0.31 <sup>f</sup> | 60.75 $\pm$ 0.51 <sup>f</sup> | 62.78 $\pm$ 0.24 <sup>f</sup> |
|  | 5d | 62.5 $\mu$ M | 19.45 $\pm$ 0.40 <sup>a</sup> | 21.56 $\pm$ 0.12 <sup>a</sup> | 23.00 $\pm$ 0.20 <sup>a</sup> |
|  |    | 125 $\mu$ M  | 26.95 $\pm$ 0.32 <sup>b</sup> | 28.89 $\pm$ 0.41 <sup>b</sup> | 31.49 $\pm$ 0.55 <sup>b</sup> |
|  |    | 250 $\mu$ M  | 37.03 $\pm$ 0.22 <sup>c</sup> | 39.42 $\pm$ 0.51 <sup>c</sup> | 41.69 $\pm$ 0.27 <sup>c</sup> |
|  |    | 500 $\mu$ M  | 44.87 $\pm$ 0.93 <sup>d</sup> | 46.89 $\pm$ 0.67 <sup>d</sup> | 48.90 $\pm$ 0.55 <sup>d</sup> |
|  |    | 1000 $\mu$ M | 50.95 $\pm$ 0.26 <sup>e</sup> | 53.86 $\pm$ 0.47 <sup>e</sup> | 55.90 $\pm$ 0.44 <sup>e</sup> |
|  |    | 2000 $\mu$ M | 58.79 $\pm$ 0.31 <sup>f</sup> | 61.48 $\pm$ 0.51 <sup>f</sup> | 63.79 $\pm$ 0.24 <sup>f</sup> |

|    |              |                               |                               |                               |                               |
|----|--------------|-------------------------------|-------------------------------|-------------------------------|-------------------------------|
|    | 5e           | 62.5 $\mu$ M                  | 21.02 $\pm$ 0.40 <sup>a</sup> | 23.59 $\pm$ 0.12 <sup>a</sup> | 25.07 $\pm$ 0.20 <sup>a</sup> |
|    |              | 125 $\mu$ M                   | 27.95 $\pm$ 0.32 <sup>b</sup> | 29.89 $\pm$ 0.41 <sup>b</sup> | 32.97 $\pm$ 0.55 <sup>b</sup> |
|    |              | 250 $\mu$ M                   | 38.25 $\pm$ 0.22 <sup>c</sup> | 40.42 $\pm$ 0.51 <sup>c</sup> | 42.92 $\pm$ 0.27 <sup>c</sup> |
|    |              | 500 $\mu$ M                   | 45.88 $\pm$ 0.93 <sup>d</sup> | 47.99 $\pm$ 0.67 <sup>d</sup> | 49.95 $\pm$ 0.55 <sup>d</sup> |
|    |              | 1000 $\mu$ M                  | 52.96 $\pm$ 0.26 <sup>e</sup> | 54.89 $\pm$ 0.47 <sup>e</sup> | 56.92 $\pm$ 0.44 <sup>e</sup> |
|    |              | 2000 $\mu$ M                  | 59.88 $\pm$ 0.31 <sup>f</sup> | 62.48 $\pm$ 0.51 <sup>f</sup> | 64.96 $\pm$ 0.24 <sup>f</sup> |
|    | 6a           | 62.5 $\mu$ M                  | 22.32 $\pm$ 0.40 <sup>a</sup> | 24.79 $\pm$ 0.12 <sup>a</sup> | 26.77 $\pm$ 0.20 <sup>a</sup> |
|    |              | 125 $\mu$ M                   | 28.99 $\pm$ 0.32 <sup>b</sup> | 31.95 $\pm$ 0.41 <sup>b</sup> | 33.98 $\pm$ 0.55 <sup>b</sup> |
|    |              | 250 $\mu$ M                   | 40.25 $\pm$ 0.22 <sup>c</sup> | 43.67 $\pm$ 0.51 <sup>c</sup> | 45.88 $\pm$ 0.27 <sup>c</sup> |
|    |              | 500 $\mu$ M                   | 47.90 $\pm$ 0.93 <sup>d</sup> | 51.28 $\pm$ 0.67 <sup>d</sup> | 53.95 $\pm$ 0.55 <sup>d</sup> |
|    |              | 1000 $\mu$ M                  | 54.00 $\pm$ 0.26 <sup>e</sup> | 56.77 $\pm$ 0.47 <sup>e</sup> | 58.97 $\pm$ 0.44 <sup>e</sup> |
|    |              | 2000 $\mu$ M                  | 60.22 $\pm$ 0.31 <sup>f</sup> | 63.85 $\pm$ 0.51 <sup>f</sup> | 65.97 $\pm$ 0.24 <sup>f</sup> |
|    | 6b           | 62.5 $\mu$ M                  | 19.56 $\pm$ 0.45 <sup>a</sup> | 21.05 $\pm$ 0.17 <sup>a</sup> | 23.45 $\pm$ 0.24 <sup>a</sup> |
|    |              | 125 $\mu$ M                   | 25.79 $\pm$ 0.32 <sup>b</sup> | 29.65 $\pm$ 0.41 <sup>b</sup> | 32.27 $\pm$ 0.55 <sup>b</sup> |
|    |              | 250 $\mu$ M                   | 37.75 $\pm$ 0.22 <sup>c</sup> | 40.44 $\pm$ 0.51 <sup>c</sup> | 44.49 $\pm$ 0.27 <sup>c</sup> |
|    |              | 500 $\mu$ M                   | 46.57 $\pm$ 0.93 <sup>d</sup> | 49.78 $\pm$ 0.67 <sup>d</sup> | 51.58 $\pm$ 0.55 <sup>d</sup> |
|    |              | 1000 $\mu$ M                  | 62.91 $\pm$ 0.26 <sup>e</sup> | 65.14 $\pm$ 0.47 <sup>e</sup> | 69.14 $\pm$ 0.44 <sup>e</sup> |
|    |              | 2000 $\mu$ M                  | 71.87 $\pm$ 0.31 <sup>f</sup> | 74.57 $\pm$ 0.51 <sup>f</sup> | 76.52 $\pm$ 0.24 <sup>f</sup> |
|    | 6c           | 62.5 $\mu$ M                  | 20.48 $\pm$ 0.45 <sup>a</sup> | 23.05 $\pm$ 0.17 <sup>a</sup> | 25.45 $\pm$ 0.24 <sup>a</sup> |
|    |              | 125 $\mu$ M                   | 35.77 $\pm$ 0.32 <sup>b</sup> | 39.69 $\pm$ 0.41 <sup>b</sup> | 42.78 $\pm$ 0.55 <sup>b</sup> |
|    |              | 250 $\mu$ M                   | 47.79 $\pm$ 0.22 <sup>c</sup> | 49.45 $\pm$ 0.51 <sup>c</sup> | 52.48 $\pm$ 0.27 <sup>c</sup> |
|    |              | 500 $\mu$ M                   | 56.57 $\pm$ 0.93 <sup>d</sup> | 59.78 $\pm$ 0.67 <sup>d</sup> | 63.59 $\pm$ 0.55 <sup>d</sup> |
|    |              | 1000 $\mu$ M                  | 64.91 $\pm$ 0.26 <sup>e</sup> | 66.74 $\pm$ 0.47 <sup>e</sup> | 70.84 $\pm$ 0.44 <sup>e</sup> |
|    |              | 2000 $\mu$ M                  | 73.87 $\pm$ 0.31 <sup>f</sup> | 75.67 $\pm$ 0.51 <sup>f</sup> | 78.94 $\pm$ 0.24 <sup>f</sup> |
| 6d | 62.5 $\mu$ M | 23.48 $\pm$ 0.45 <sup>a</sup> | 25.35 $\pm$ 0.17 <sup>a</sup> | 27.68 $\pm$ 0.24 <sup>a</sup> |                               |
|    | 125 $\mu$ M  | 38.77 $\pm$ 0.32 <sup>b</sup> | 43.89 $\pm$ 0.41 <sup>b</sup> | 45.79 $\pm$ 0.55 <sup>b</sup> |                               |
|    | 250 $\mu$ M  | 49.81 $\pm$ 0.22 <sup>c</sup> | 52.45 $\pm$ 0.51 <sup>c</sup> | 55.49 $\pm$ 0.27 <sup>c</sup> |                               |
|    | 500 $\mu$ M  | 59.67 $\pm$ 0.93 <sup>d</sup> | 60.85 $\pm$ 0.67 <sup>d</sup> | 64.89 $\pm$ 0.55 <sup>d</sup> |                               |
|    | 1000 $\mu$ M | 66.95 $\pm$ 0.26 <sup>e</sup> | 69.78 $\pm$ 0.47 <sup>e</sup> | 73.89 $\pm$ 0.44 <sup>e</sup> |                               |
|    | 2000 $\mu$ M | 75.89 $\pm$ 0.31 <sup>f</sup> | 78.87 $\pm$ 0.51 <sup>f</sup> | 81.52 $\pm$ 0.24 <sup>f</sup> |                               |
| 6e | 62.5 $\mu$ M | 25.48 $\pm$ 0.45 <sup>a</sup> | 27.35 $\pm$ 0.17 <sup>a</sup> | 29.68 $\pm$ 0.24 <sup>a</sup> |                               |
|    | 125 $\mu$ M  | 40.77 $\pm$ 0.32 <sup>b</sup> | 42.89 $\pm$ 0.41 <sup>b</sup> | 45.27 $\pm$ 0.55 <sup>b</sup> |                               |
|    | 250 $\mu$ M  | 50.85 $\pm$ 0.22 <sup>c</sup> | 53.45 $\pm$ 0.51 <sup>c</sup> | 57.49 $\pm$ 0.27 <sup>c</sup> |                               |
|    | 500 $\mu$ M  | 61.68 $\pm$ 0.93 <sup>d</sup> | 63.89 $\pm$ 0.67 <sup>d</sup> | 65.92 $\pm$ 0.55 <sup>d</sup> |                               |
|    | 1000 $\mu$ M | 67.95 $\pm$ 0.26 <sup>e</sup> | 72.88 $\pm$ 0.47 <sup>e</sup> | 74.92 $\pm$ 0.44 <sup>e</sup> |                               |
|    | 2000 $\mu$ M | 76.41 $\pm$ 0.31 <sup>f</sup> | 79.97 $\pm$ 0.51 <sup>f</sup> | 82.85 $\pm$ 0.24 <sup>f</sup> |                               |

Values are expressed as mean  $\pm$  SD. Means in the same column with distinct superscripts (a – f) are significantly different ( $p \leq 0.05$ ) as separated by the Duncan multiple range test

**Table S2.** Caspase 3 assay of MDA-MB-468 and HCT 15 cells.

| Name of the cell line | Groups                       | % Caspase 3 expressing cells |
|-----------------------|------------------------------|------------------------------|
| <b>MDA-MB-468</b>     | Control                      | 2.0 ± 0.04 <sup>b</sup>      |
|                       | Vehicle control              | 0.62 ± 0.38 <sup>a</sup>     |
|                       | 5 fluorouracil (100 µM)      | 96.35 ± 0.44 <sup>g</sup>    |
|                       | Compound <b>6f</b> (62.5 µM) | 8.40 ± 0.23 <sup>c</sup>     |
|                       | Compound <b>6f</b> (125 µM)  | 17.27 ± 0.70 <sup>d</sup>    |
|                       | Compound <b>6f</b> (250 µM)  | 36.37 ± 1.41 <sup>e</sup>    |
|                       | Compound <b>6f</b> (500 µM)  | 70.84 ± 1.86 <sup>f</sup>    |
|                       | Compound <b>6f</b> (1000 µM) | 97.54 ± 1.29 <sup>g</sup>    |
| <b>HCT 15</b>         | Control                      | 2.0 ± 0.02 <sup>b</sup>      |
|                       | Vehicle control              | 0.70 ± 0.38 <sup>a</sup>     |
|                       | 5 fluorouracil (100 µM)      | 96.03 ± 0.48 <sup>h</sup>    |
|                       | Compound <b>6f</b> (62.5 µM) | 7.58 ± 0.35 <sup>c</sup>     |
|                       | Compound <b>6f</b> (125 µM)  | 16.84 ± 0.41 <sup>d</sup>    |
|                       | Compound <b>6f</b> (250 µM)  | 35.36 ± 0.74 <sup>e</sup>    |
|                       | Compound <b>6f</b> (500 µM)  | 62.49 ± 1.28 <sup>f</sup>    |
|                       | Compound <b>6f</b> (1000 µM) | 94.63 ± 1.93 <sup>h</sup>    |
|                       | Compound <b>6f</b> (2000 µM) | 89.27 ± 0.97 <sup>g</sup>    |

Values are expressed as mean ± SD. Means in the same column with distinct superscripts (a – h) are significantly different ( $p \leq 0.05$ ) as separated by the Duncan multiple range test.

**Table S3.** Apoptotic assay of MDA-MB-468 and HCT 15 cells.

| <b>Name of the cell line</b> | <b>Groups</b>                | <b>% Dead cells</b>       |
|------------------------------|------------------------------|---------------------------|
| <b>MDA-MB-468</b>            | Control                      | 2.00 ± 0.02 <sup>a</sup>  |
|                              | Vehicle control              | 2.50 ± 0.38 <sup>a</sup>  |
|                              | 5 fluorouracil (100 µM)      | 93.03 ± 0.54 <sup>e</sup> |
|                              | Compound <b>6f</b> (250 µM)  | 45.75 ± 1.19 <sup>b</sup> |
|                              | Compound <b>6f</b> (500 µM)  | 83.31 ± 1.14 <sup>d</sup> |
|                              | Compound <b>6f</b> (1000 µM) | 79.30 ± 0.19 <sup>c</sup> |
| <b>HCT 15</b>                | Control                      | 2.00 ± 0.02 <sup>a</sup>  |
|                              | Vehicle control              | 2.70 ± 0.38 <sup>a</sup>  |
|                              | 5 fluorouracil (100 µM)      | 86.15 ± 0.64 <sup>e</sup> |
|                              | Compound <b>6f</b> (500 µM)  | 76.49 ± 1.31 <sup>d</sup> |
|                              | Compound <b>6f</b> (1000 µM) | 73.57 ± 0.08 <sup>c</sup> |
|                              | Compound <b>6f</b> (2000 µM) | 70.27 ± 0.18 <sup>b</sup> |

*Values are expressed as mean ± SD. Means in the same column with distinct superscripts (a - e) are significantly different ( $p \leq 0.05$ ) as separated by the Duncan multiple range test.*

**Table S4.** Cell cycle analysis of MDA-MB-468 cells after 48 h.

| <b>Concentration (<math>\mu\text{M}</math>)</b> | <b>Sub <math>G_0/G_1</math> (%)</b> | <b><math>G_0/G_1</math> (%)</b> | <b>S (%)</b> | <b><math>G_2/M</math></b> |
|-------------------------------------------------|-------------------------------------|---------------------------------|--------------|---------------------------|
| Vehicle control                                 | 1.78                                | 72.5                            | 13.4         | 6.87                      |
| 5 fluorouracil (100 $\mu\text{M}$ )             | 35.46                               | 51.25                           | 8.6          | 1.54                      |
| Compound <b>6f</b> (50 $\mu\text{M}$ )          | 17.49                               | 67.41                           | 12.05        | 4.55                      |
| Compound <b>6f</b> (100 $\mu\text{M}$ )         | 48.65                               | 38.48                           | 14.5         | 3.14                      |
| Compound <b>6f</b> (200 $\mu\text{M}$ )         | 44.5                                | 41.41                           | 7.75         | 5.47                      |

**Table S5.** Cell cycle analysis of HCT 15 cells after 48 h.

| <b>Concentration (<math>\mu\text{M}</math>)</b> | <b>Sub <math>G_0/G_1</math> (%)</b> | <b><math>G_0/G_1</math> (%)</b> | <b>S (%)</b> | <b><math>G_2/M</math></b> |
|-------------------------------------------------|-------------------------------------|---------------------------------|--------------|---------------------------|
| Vehicle control                                 | 4.12                                | 72.41                           | 6.92         | 19.25                     |
| 5 fluorouracil (100 $\mu\text{M}$ )             | 1.15                                | 54.88                           | 5.25         | 40.56                     |
| Compound <b>6f</b> (50 $\mu\text{M}$ )          | 3.37                                | 62.5                            | 14           | 23.12                     |
| Compound <b>6f</b> (100 $\mu\text{M}$ )         | 1.6                                 | 44.2                            | 4.25         | 48.85                     |
| Compound <b>6f</b> (200 $\mu\text{M}$ )         | 2.87                                | 46.5                            | 6.2          | 43.25                     |



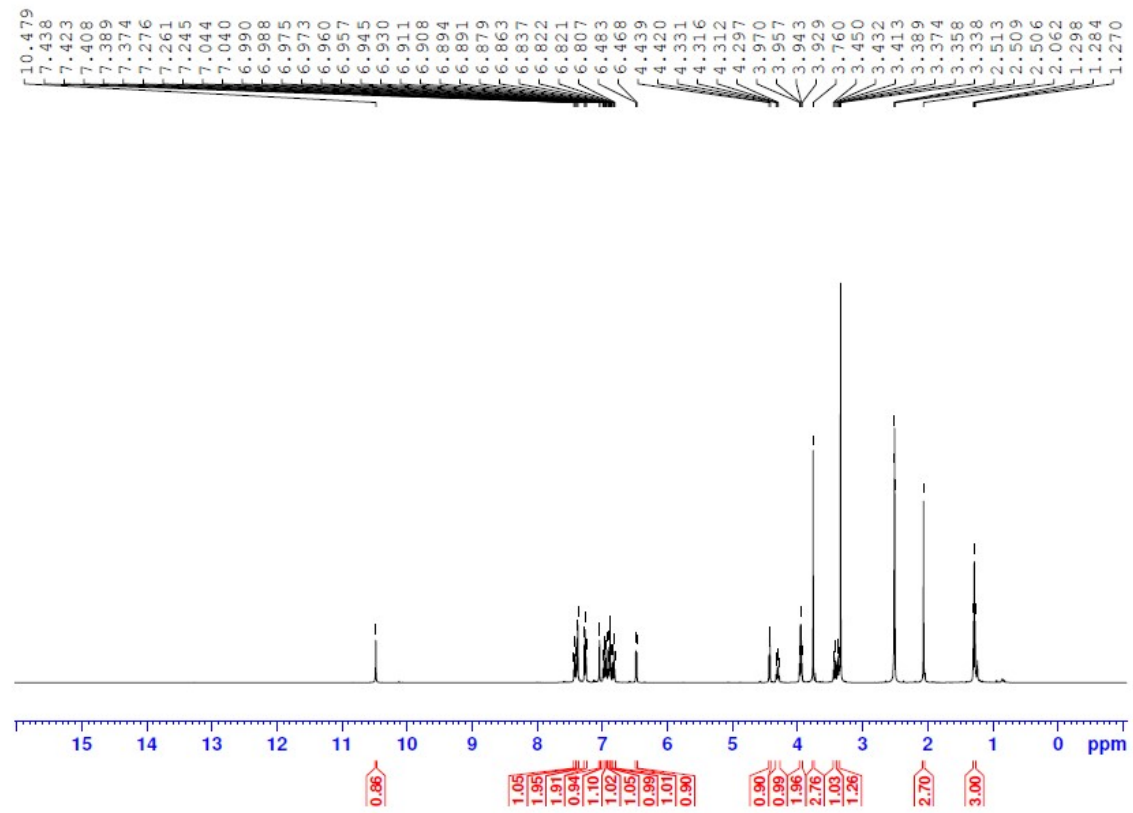

Figure S1.  $^1\text{H}$  NMR spectrum of compound **4a**.

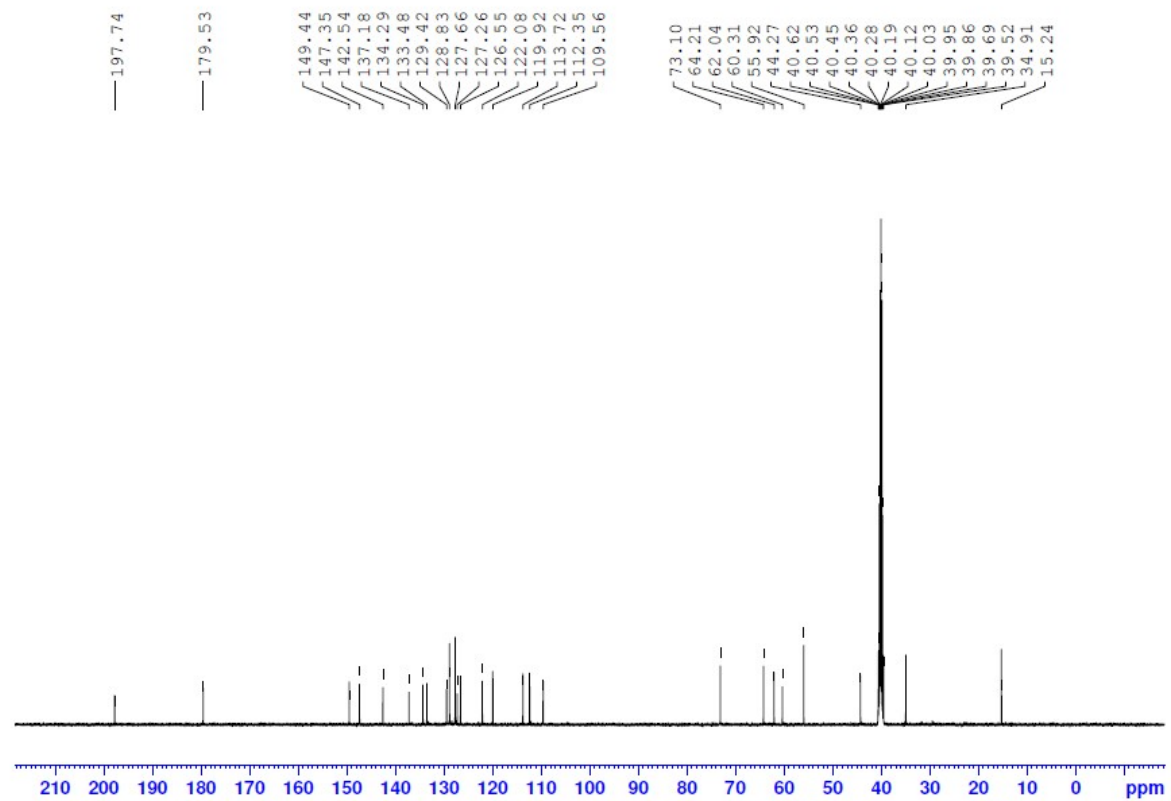

Figure S2.  $^{13}\text{C}$  NMR spectrum of compound 4a.

# Spectrum Plot Report

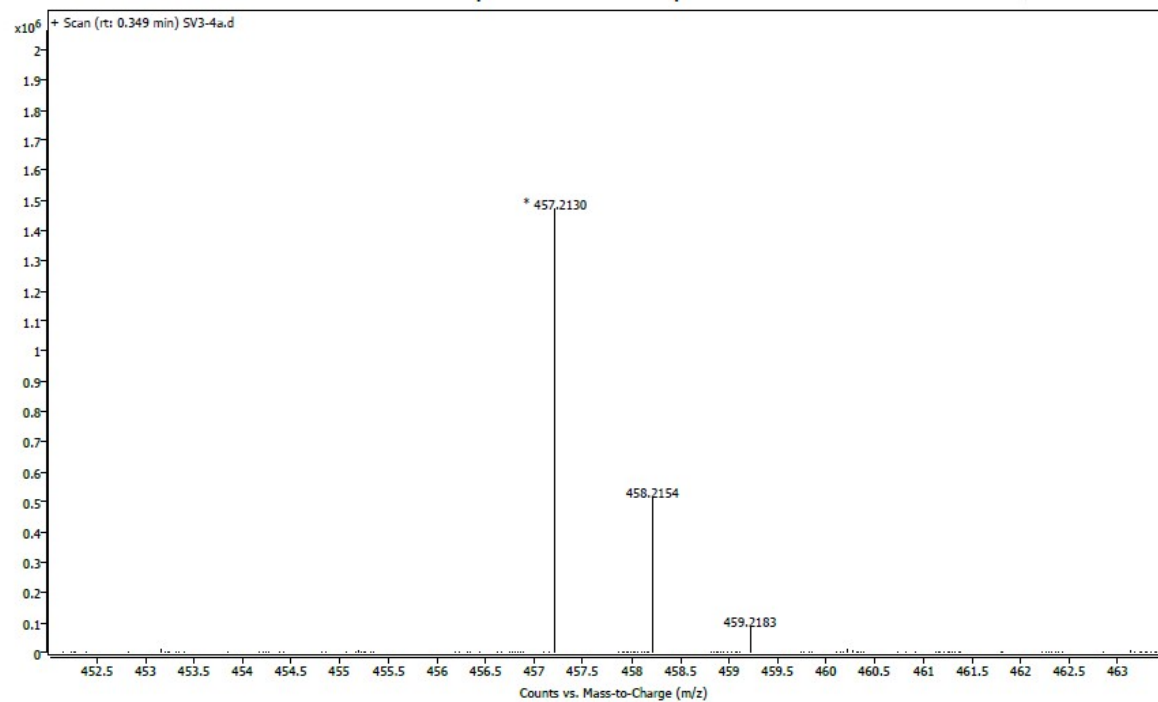

Figure S3. HR-MS spectrum of compound **4a**.

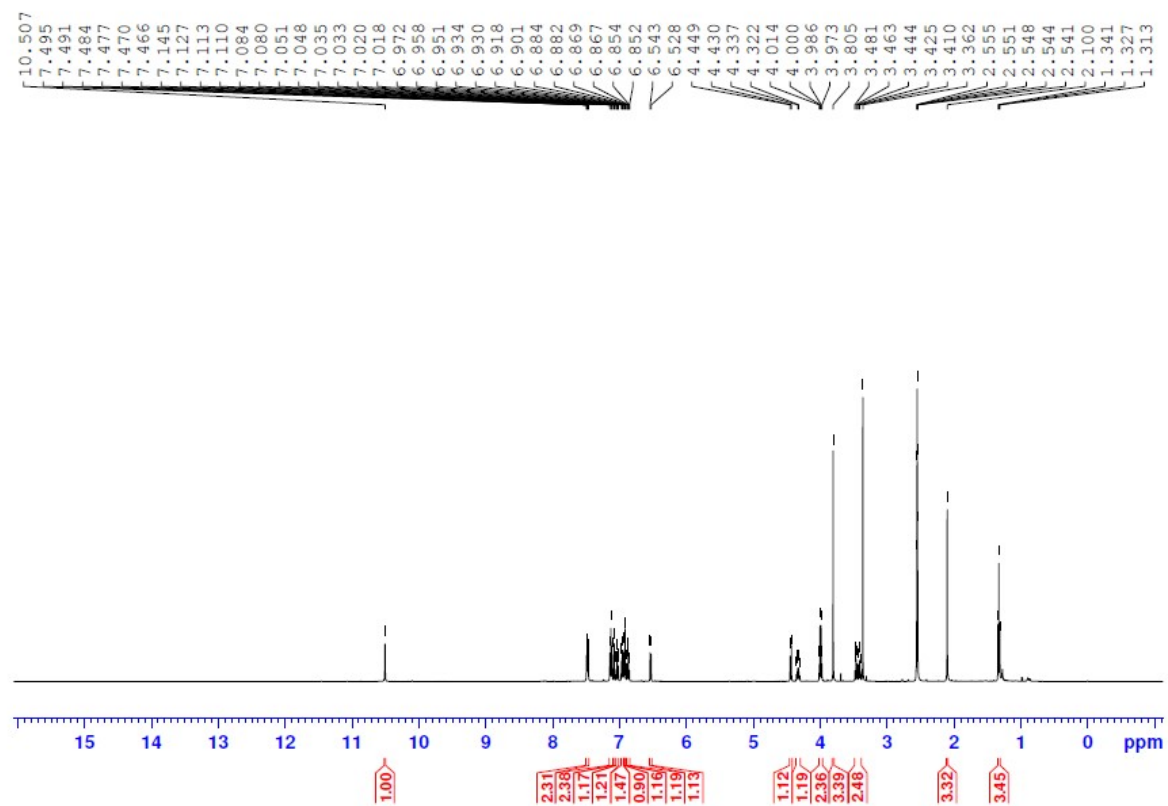

Figure S4. <sup>1</sup>H NMR spectrum of compound 4b.

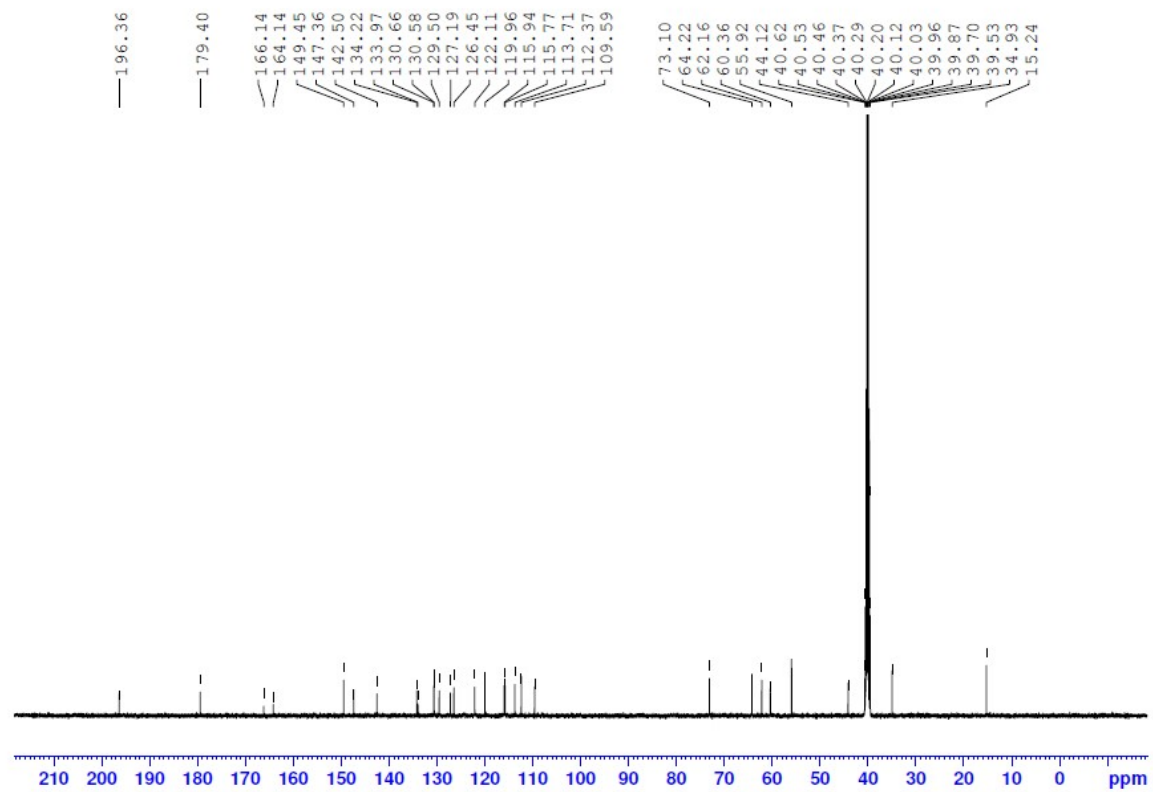

Figure S5.  $^{13}\text{C}$  NMR spectrum of compound **4b**.

# Spectrum Plot Report

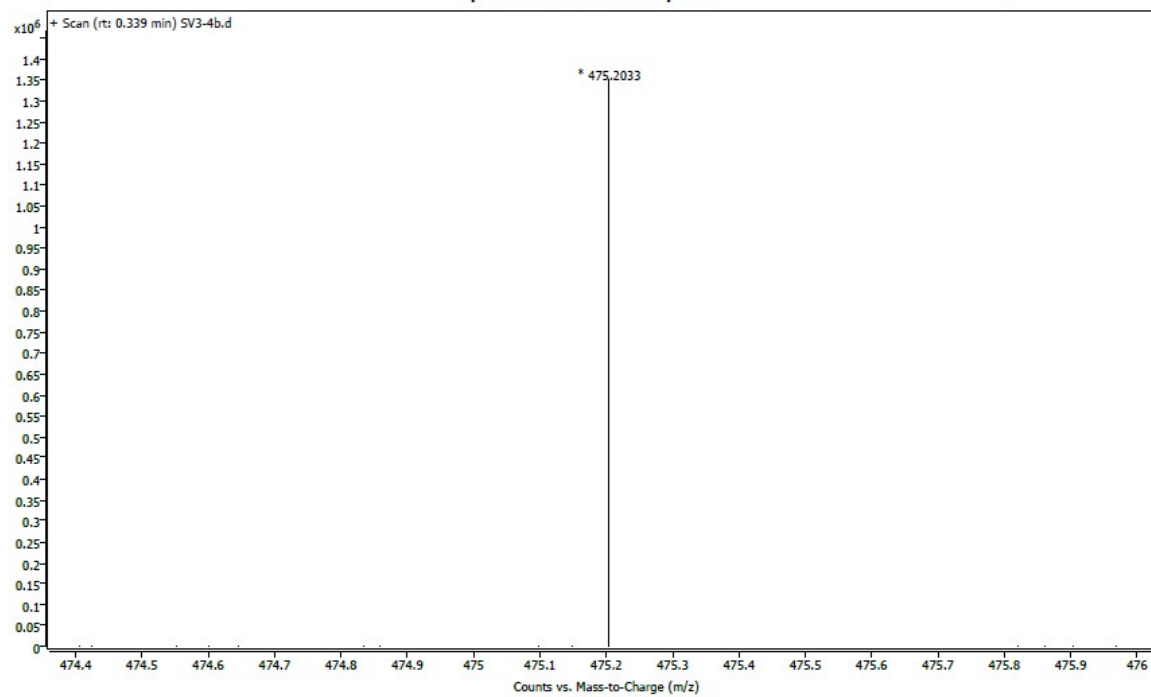

Figure S6. HR-MS spectrum of compound **4b**.

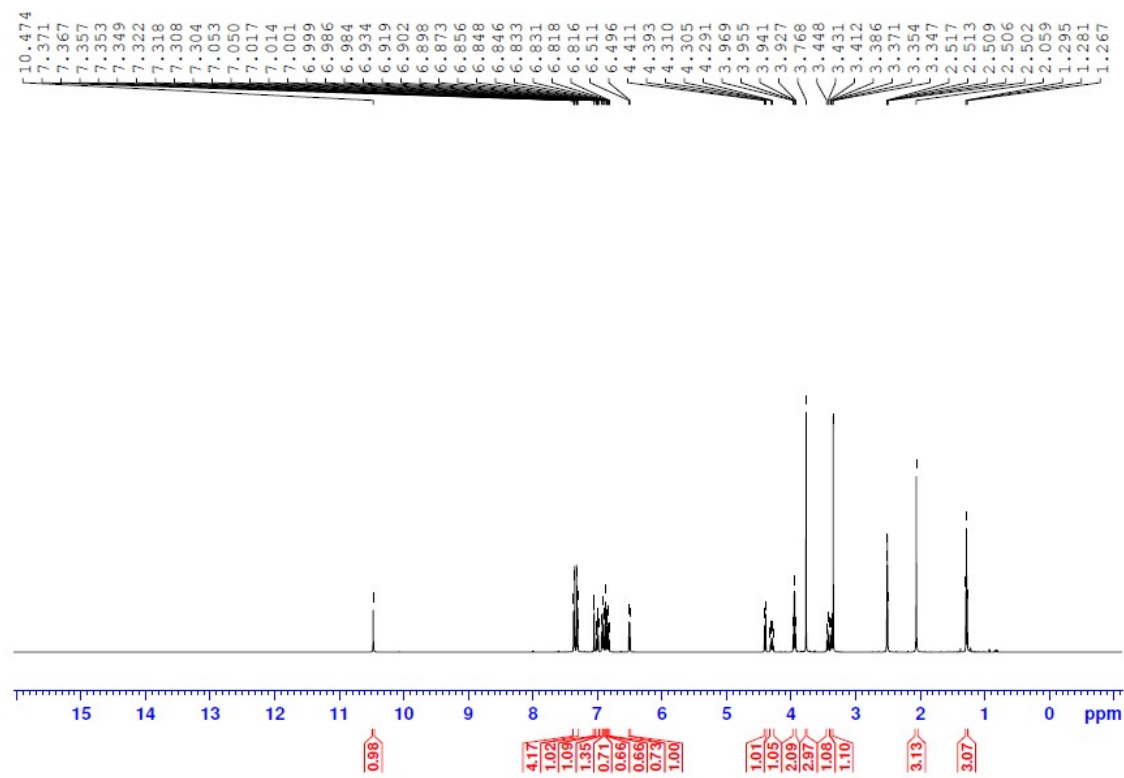

Figure S7.  $^1\text{H}$  NMR spectrum of compound **4c**.

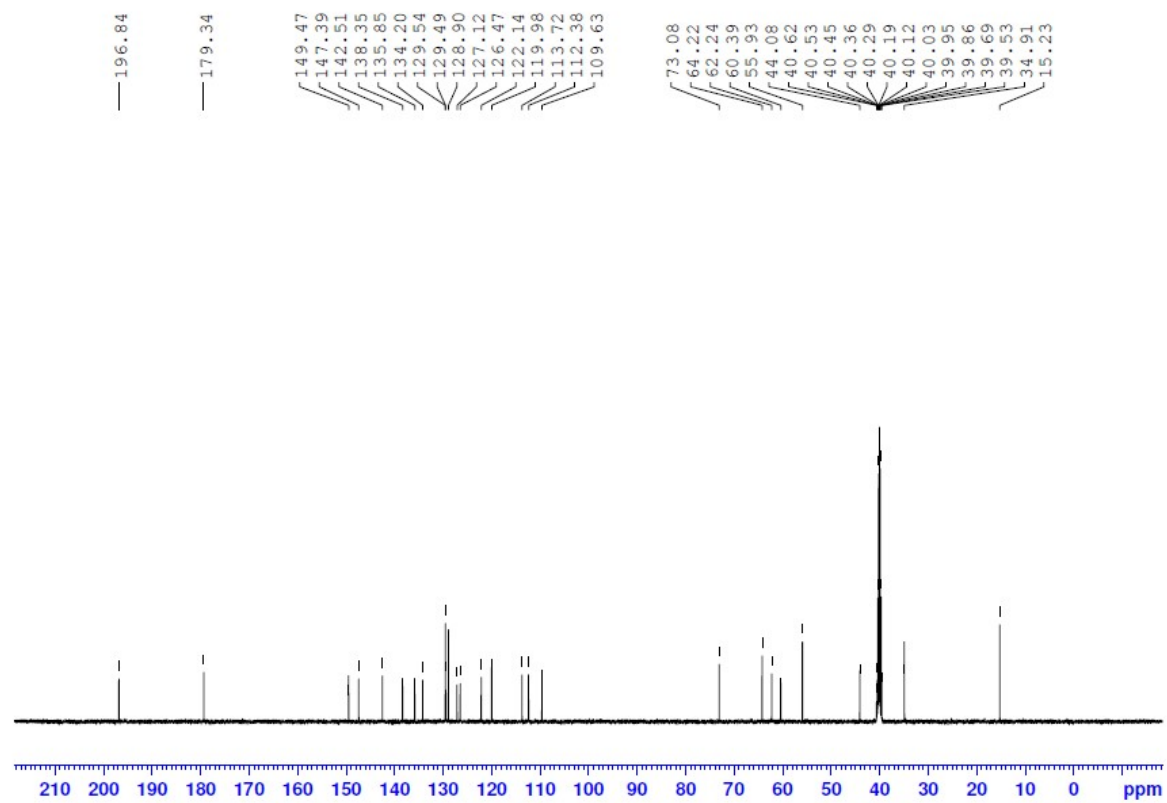

Figure S8.  $^{13}\text{C}$  NMR spectrum of compound **4c**.



# Spectrum Plot Report

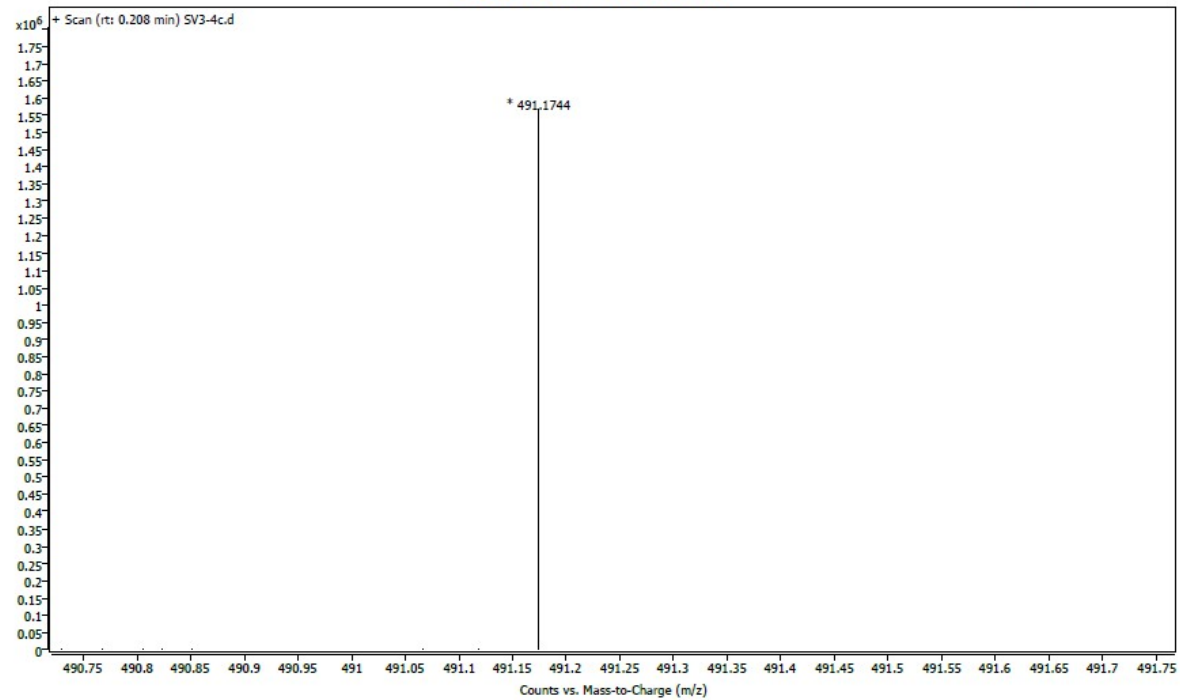

Figure S9. HR-MS spectrum of compound **4c**.

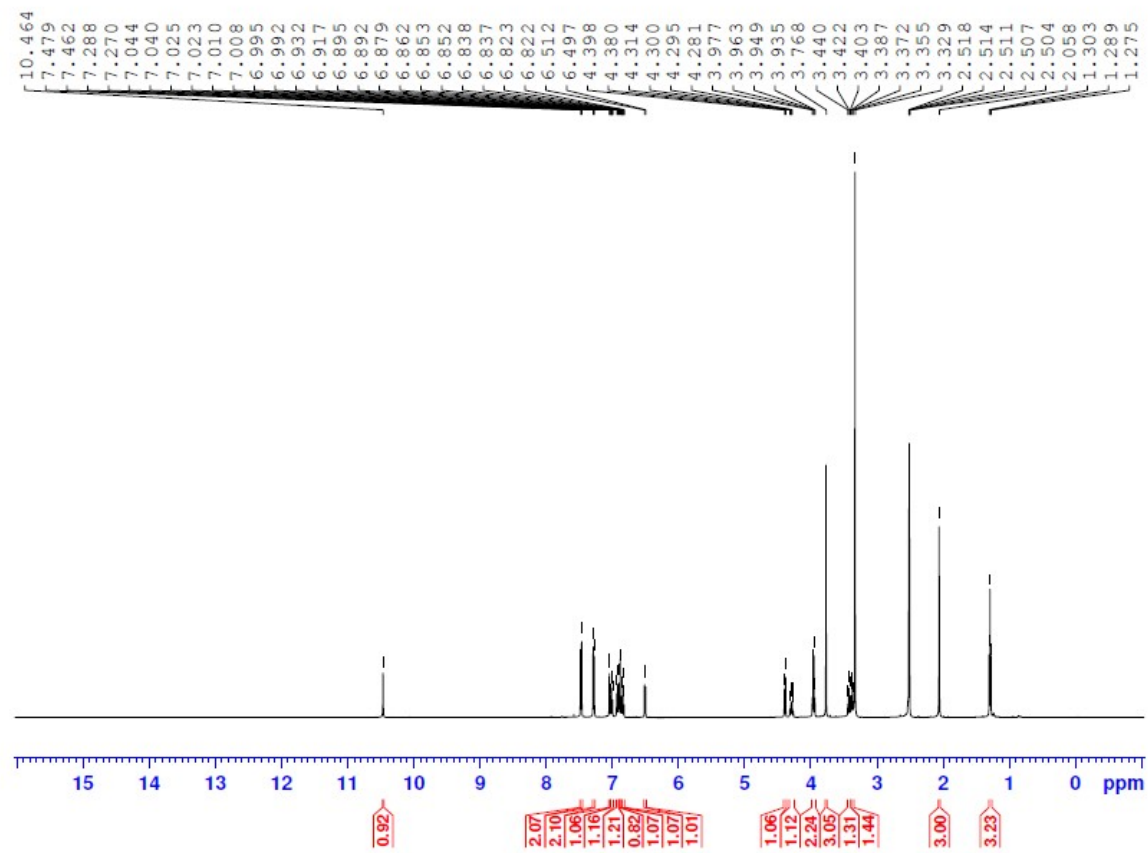

Figure S10.  $^1\text{H}$  NMR spectrum of compound **4d**.

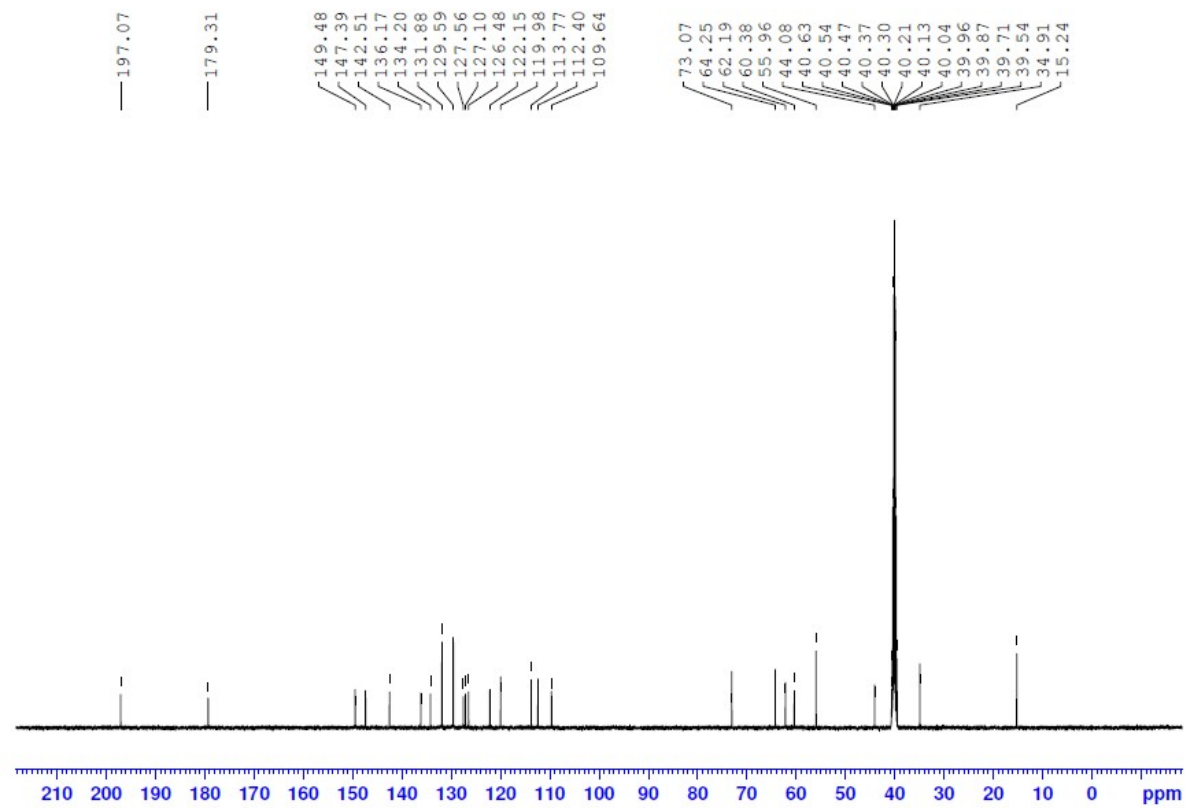

Figure S11.  $^{13}\text{C}$  NMR spectrum of compound **4d**.

# Spectrum Plot Report

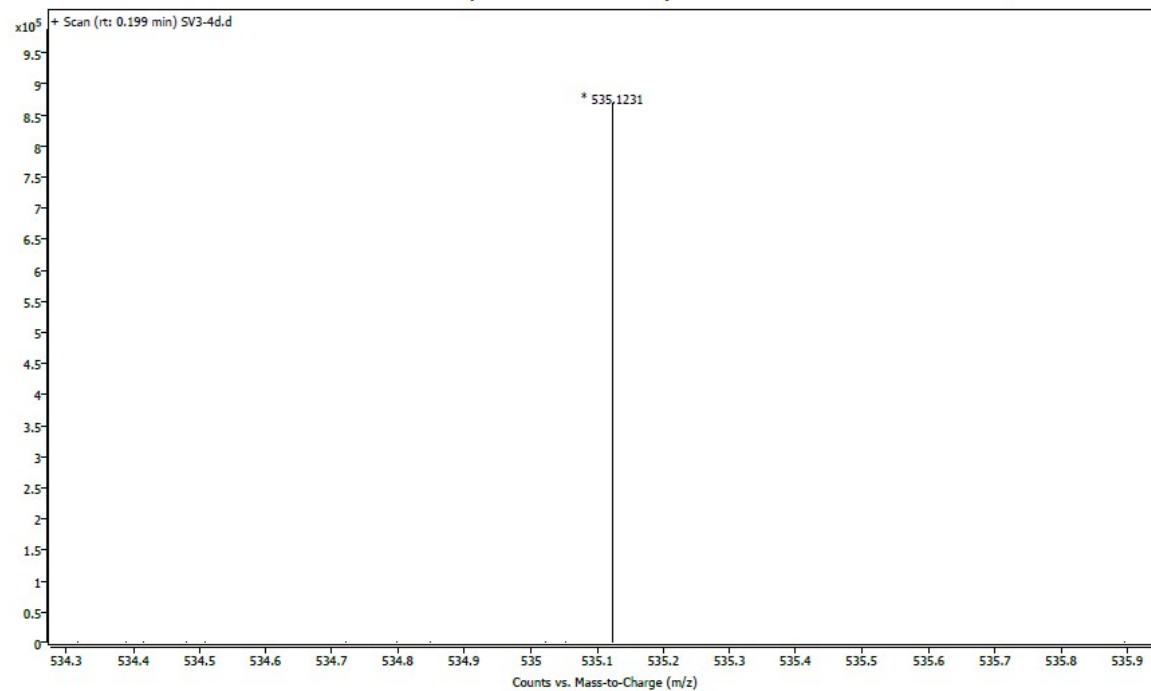

Figure S12. HR-MS spectrum of compound **4d**.

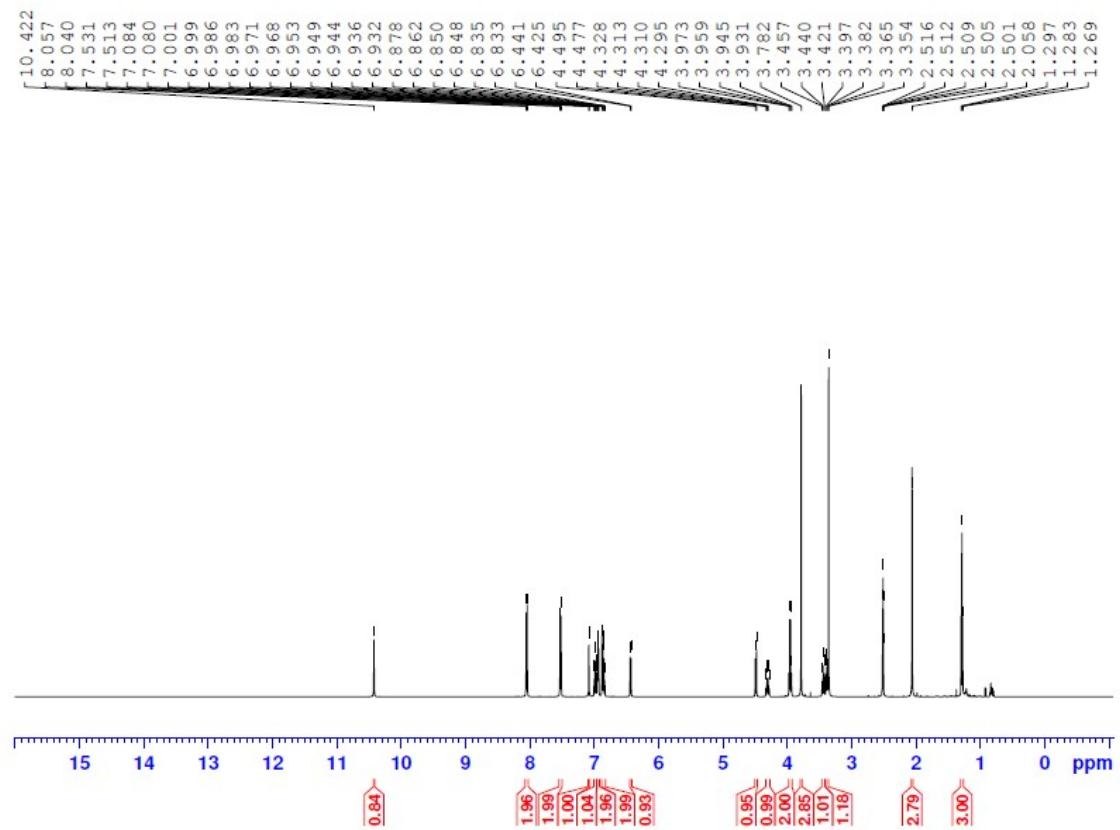

Figure S13.  $^1\text{H}$  NMR spectrum of compound **4e**.

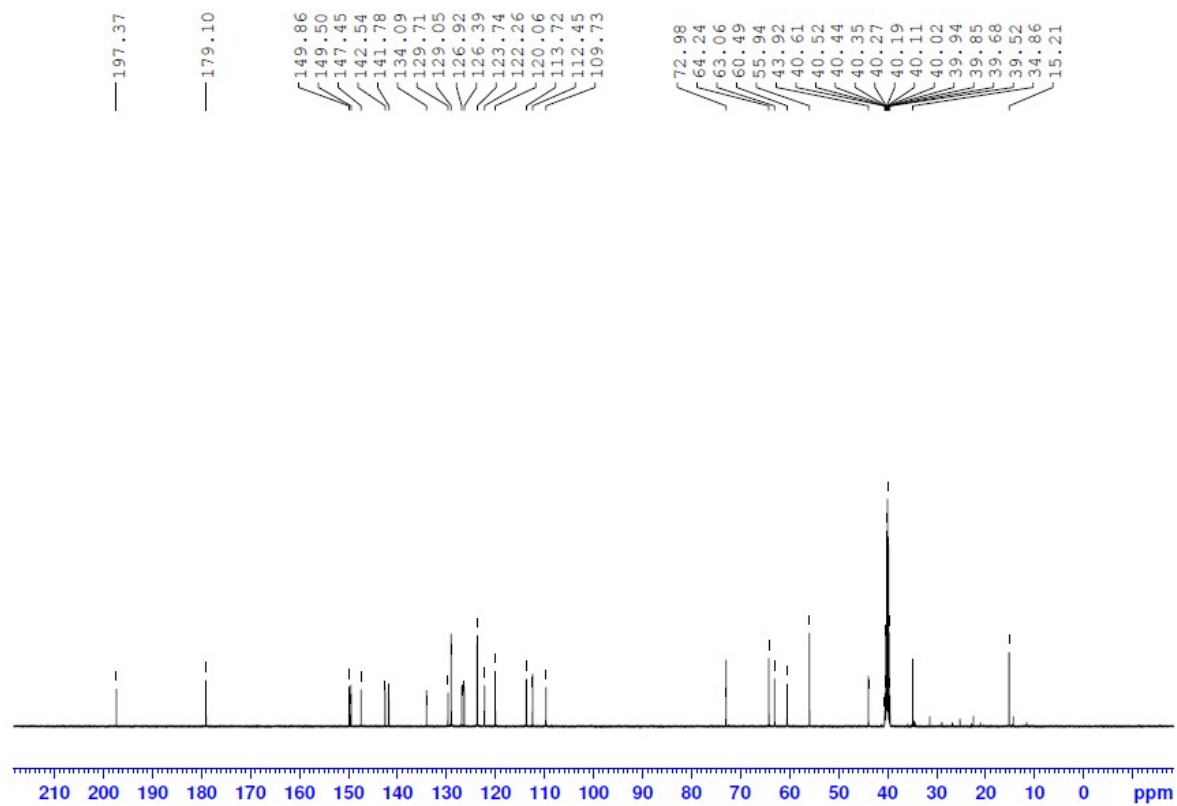

Figure S14.  $^{13}\text{C}$  NMR spectrum of compound **4e**.

# User Spectrum Plot Report

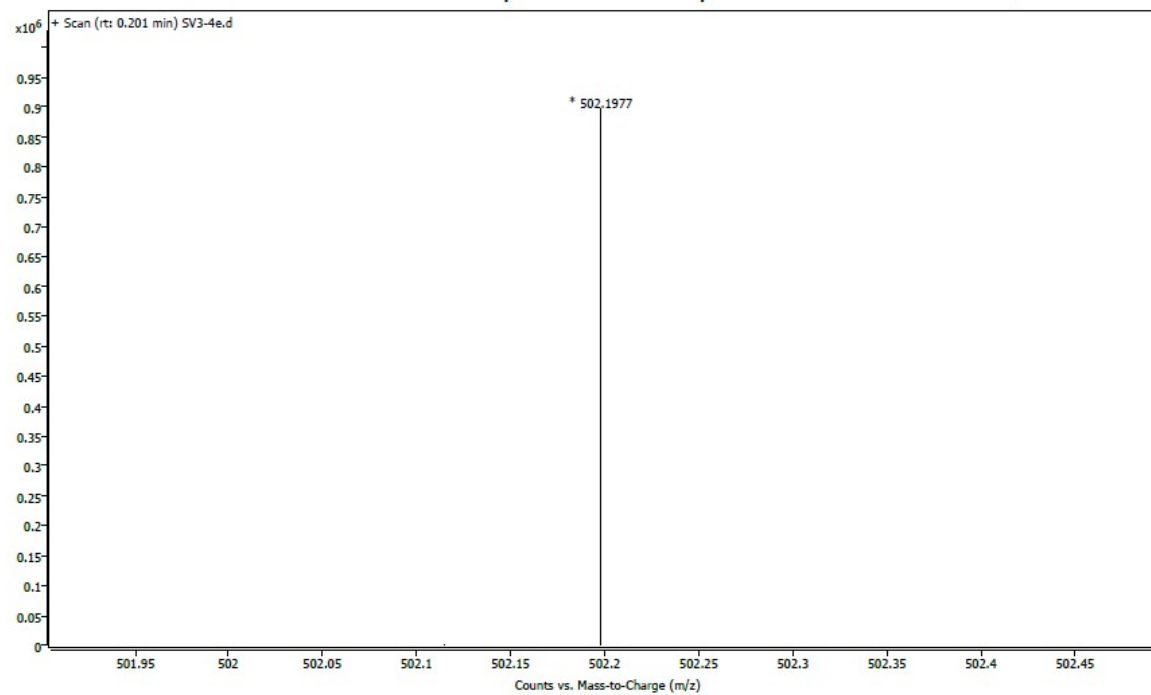

Figure S15. HR-MS spectrum of compound **4e**.

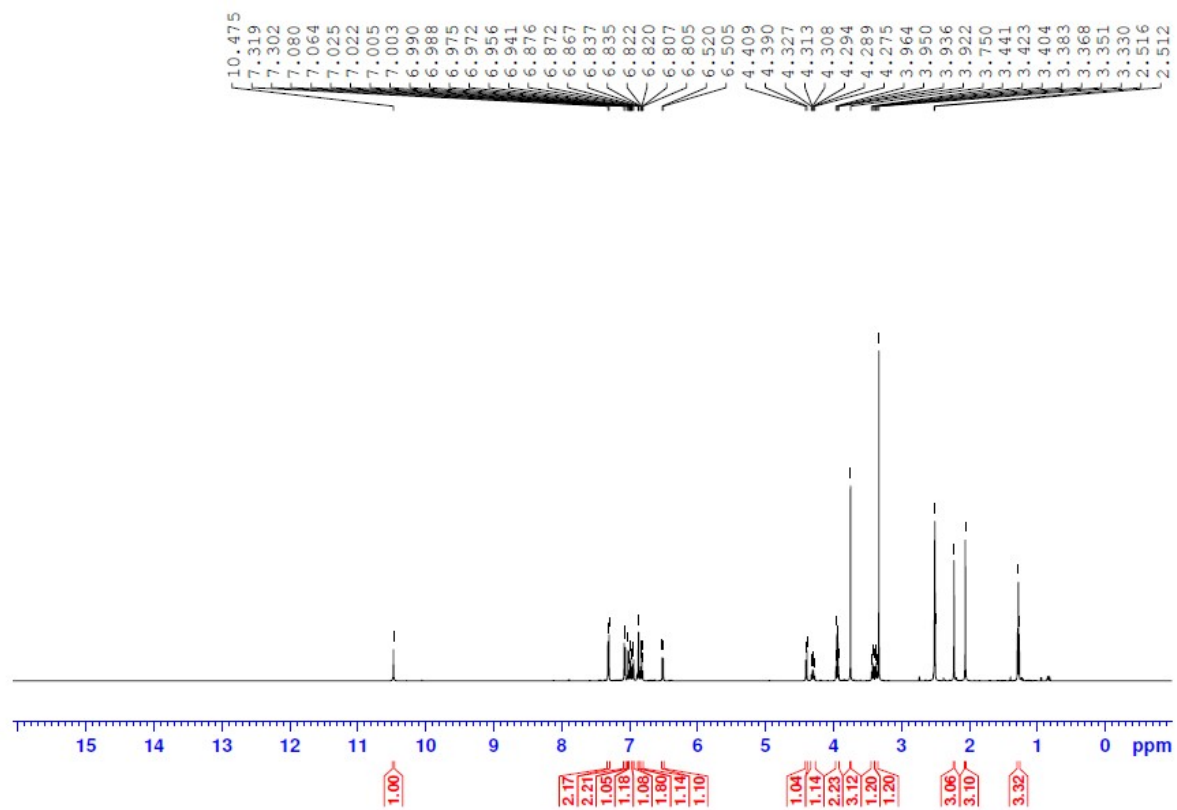

Figure S16.  $^1\text{H}$  NMR spectrum of compound **4f**.



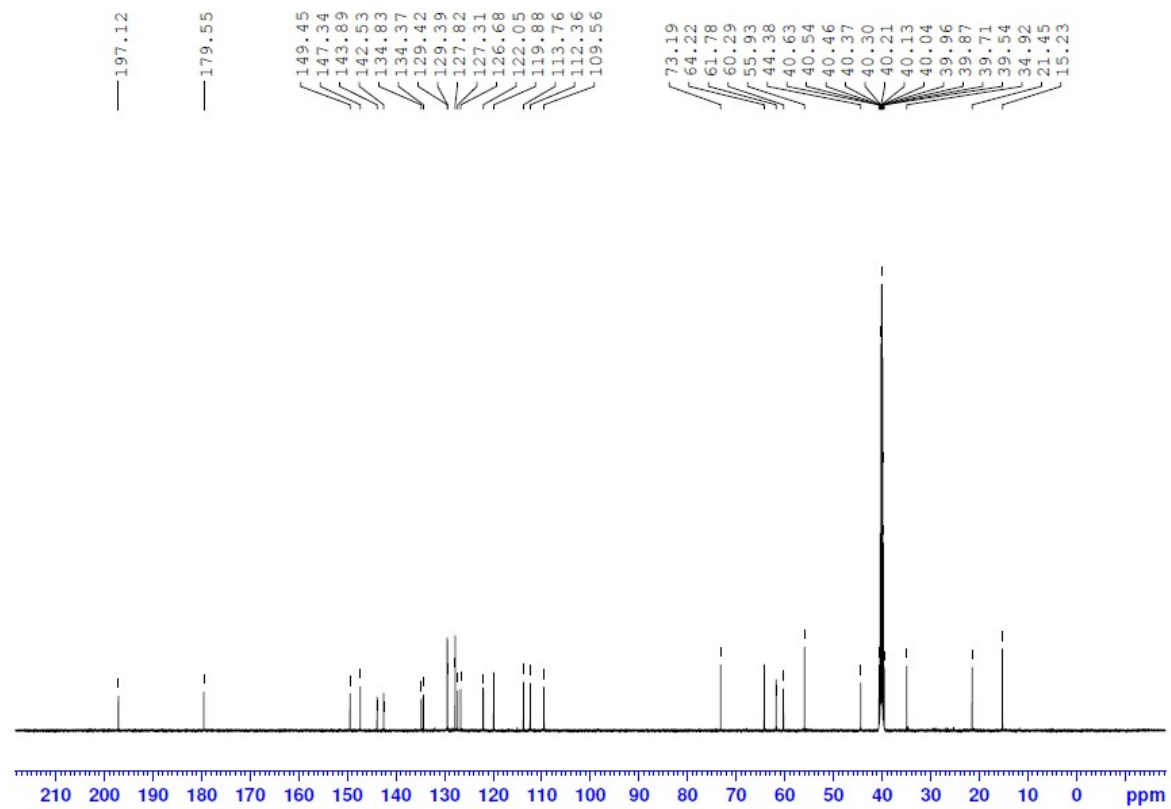

Figure S17.  $^{13}\text{C}$  NMR spectrum of compound **4f**.

# Spectrum Plot Report

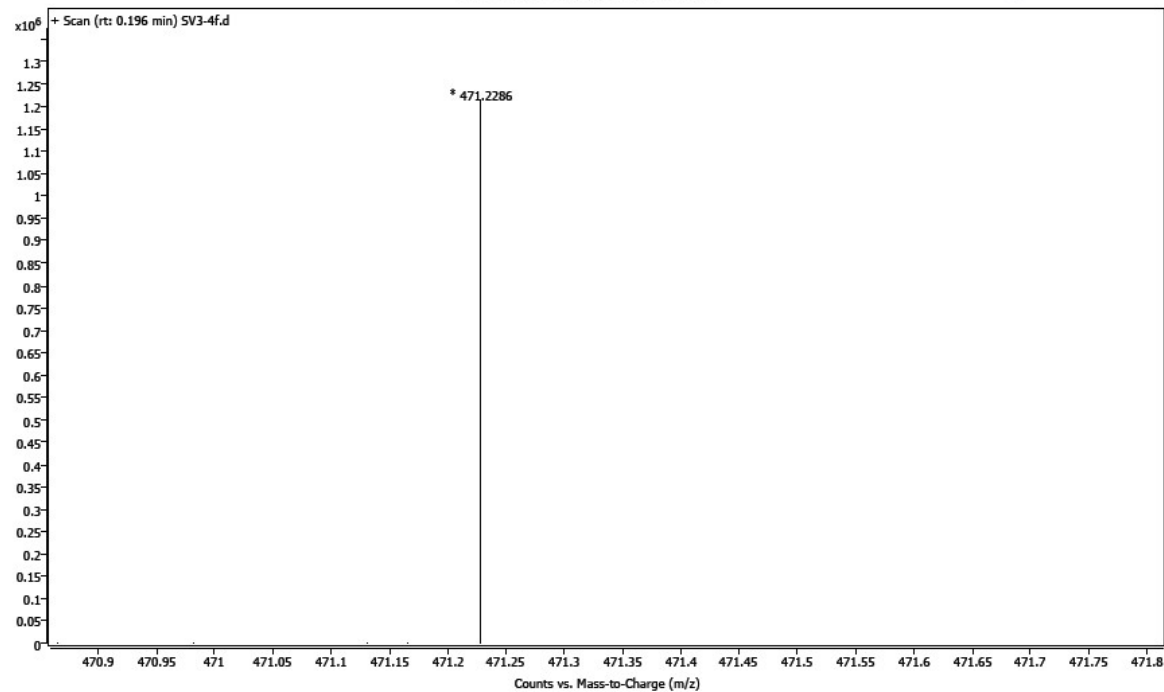

Figure S18. HR-MS spectrum of compound 4f.

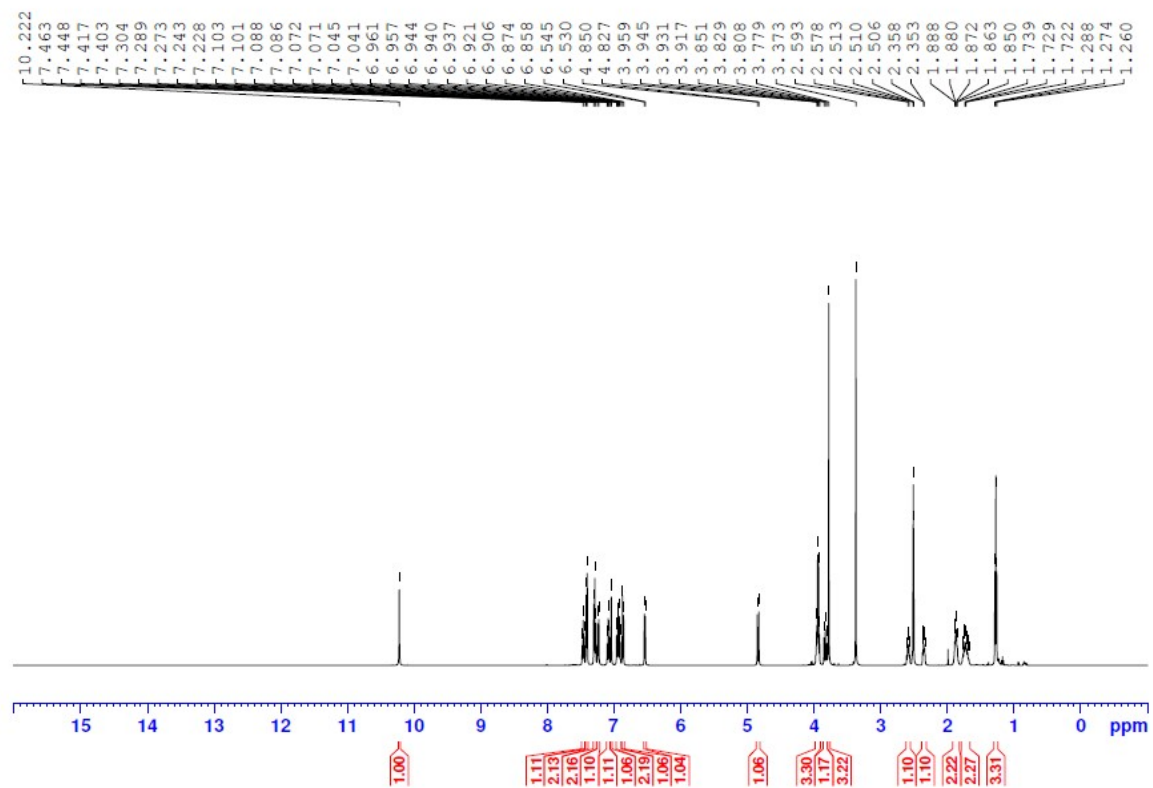

Figure S19.  $^1\text{H}$  NMR spectrum of compound **5a**.

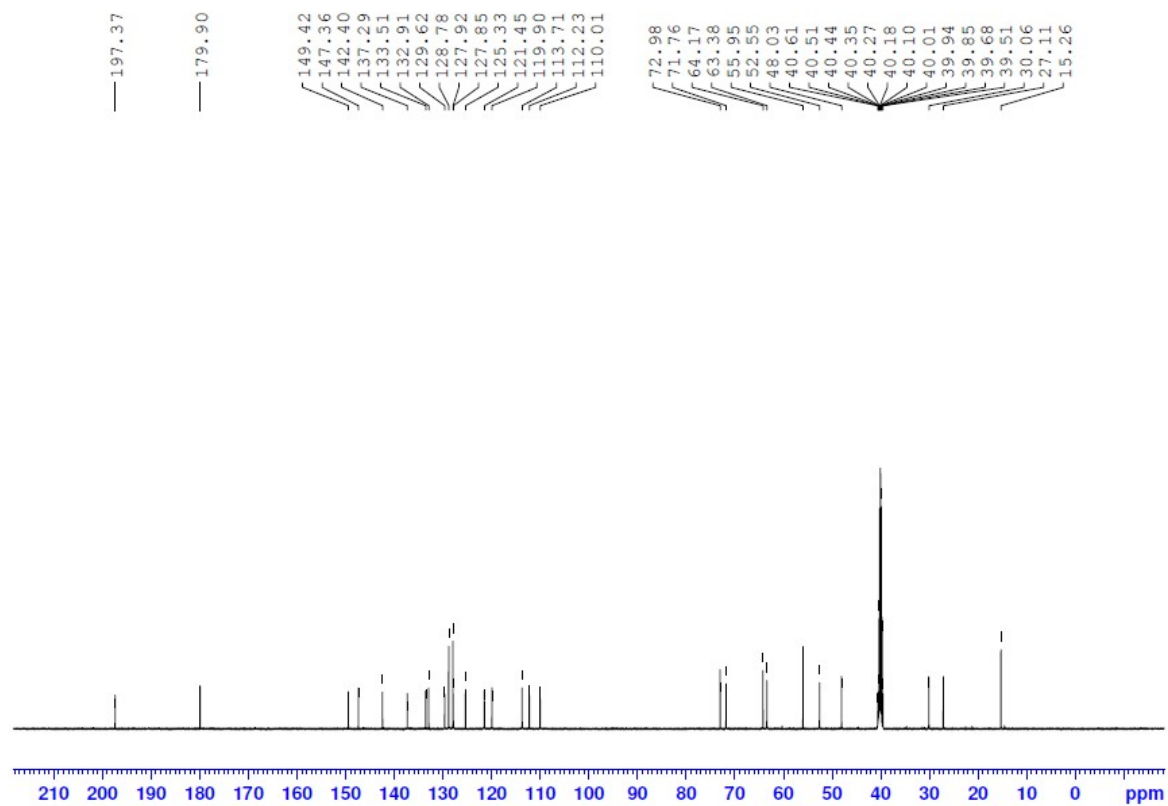

Figure S20.  $^{13}\text{C}$  NMR spectrum of compound **5a**.

# Spectrum Plot Report

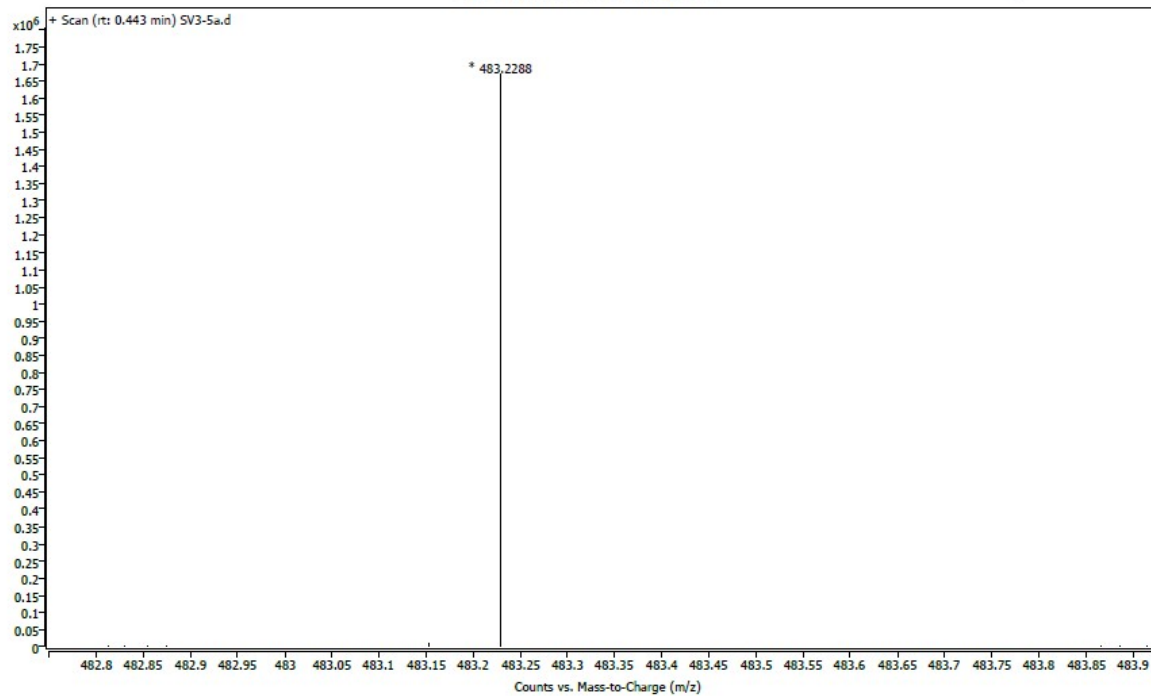

Figure S21. HR-MS spectrum of compound **5a**.

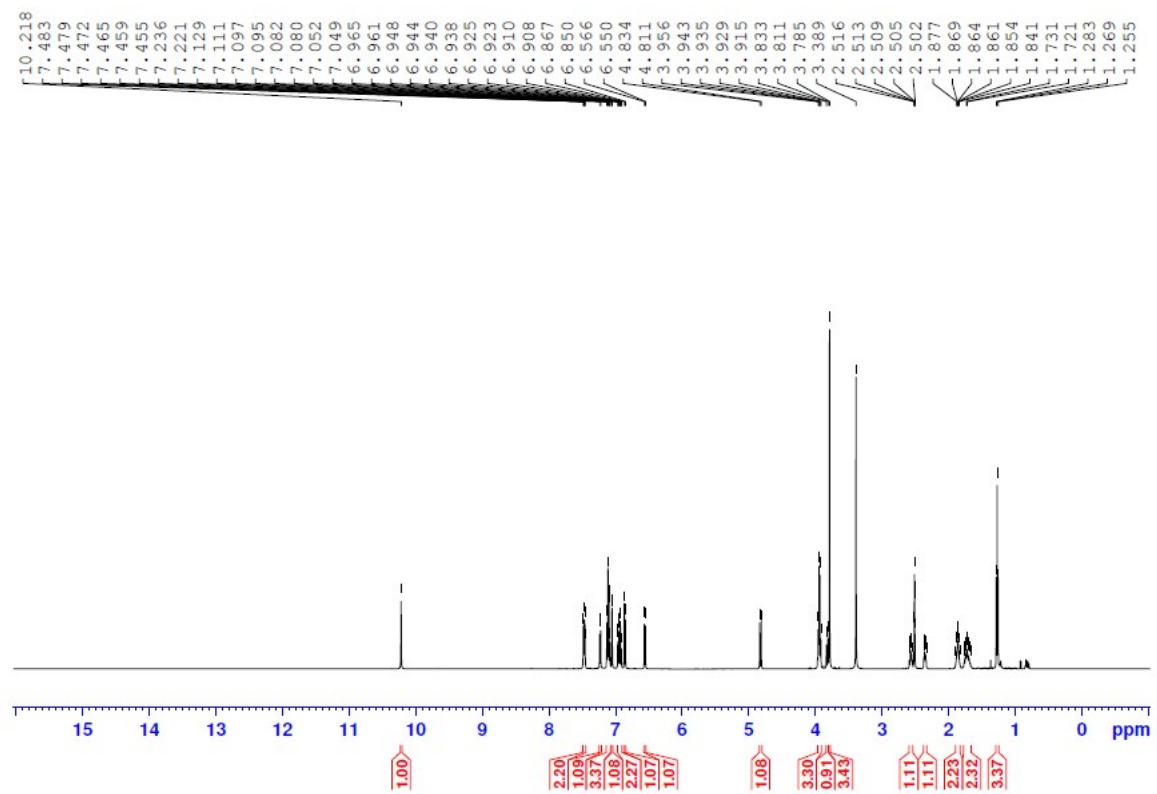

Figure S22.  $^1\text{H}$  NMR spectrum of compound **5b**.

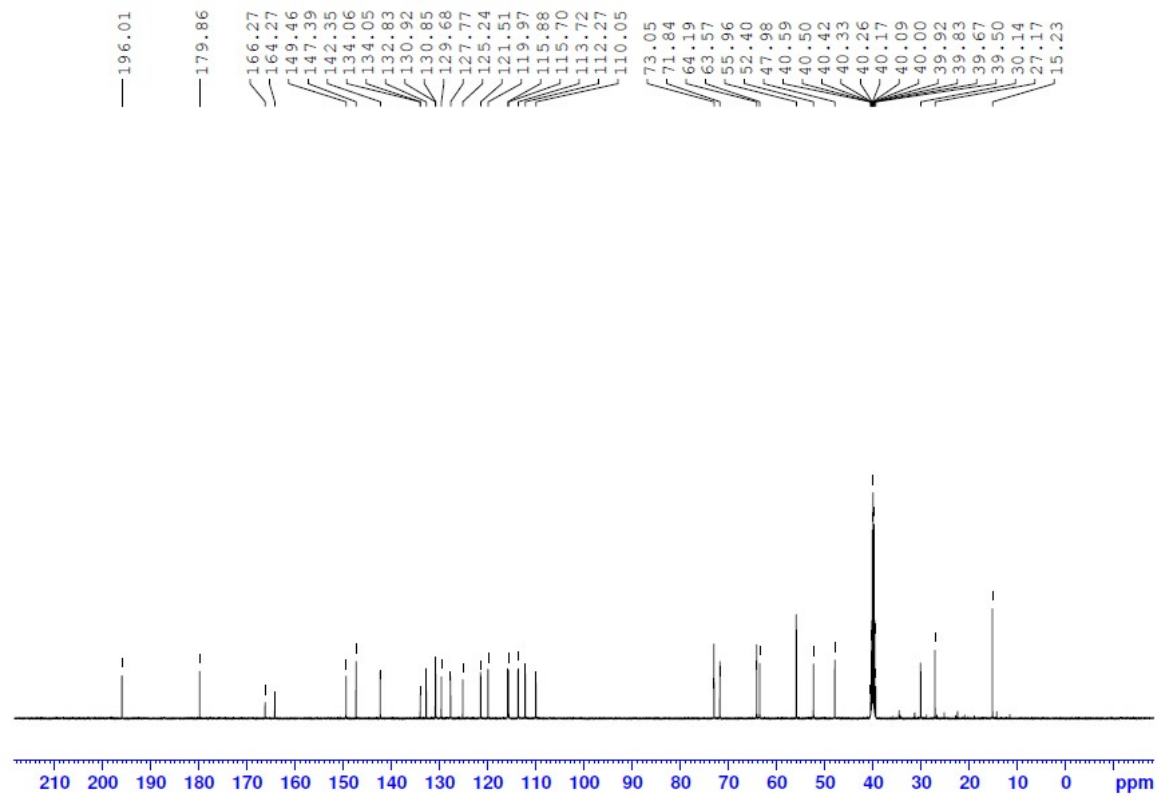

Figure S23.  $^{13}\text{C}$  NMR spectrum of compound **5b**.

# Spectrum Plot Report

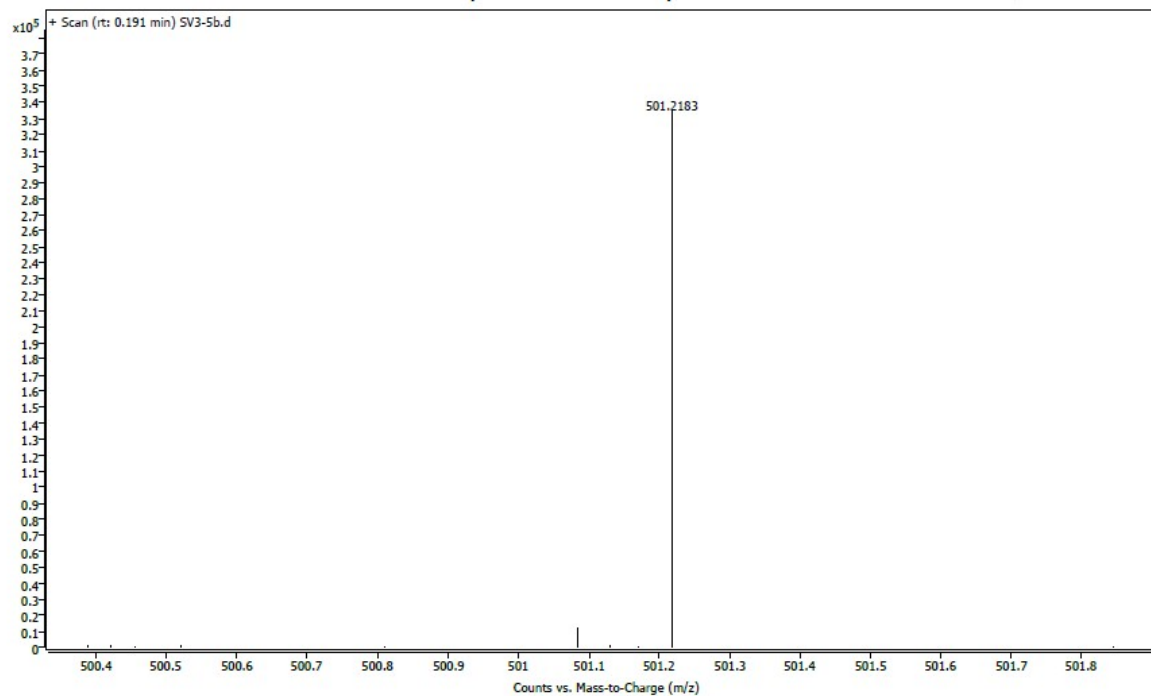

Figure S24. HR-MS spectrum of compound **5b**.



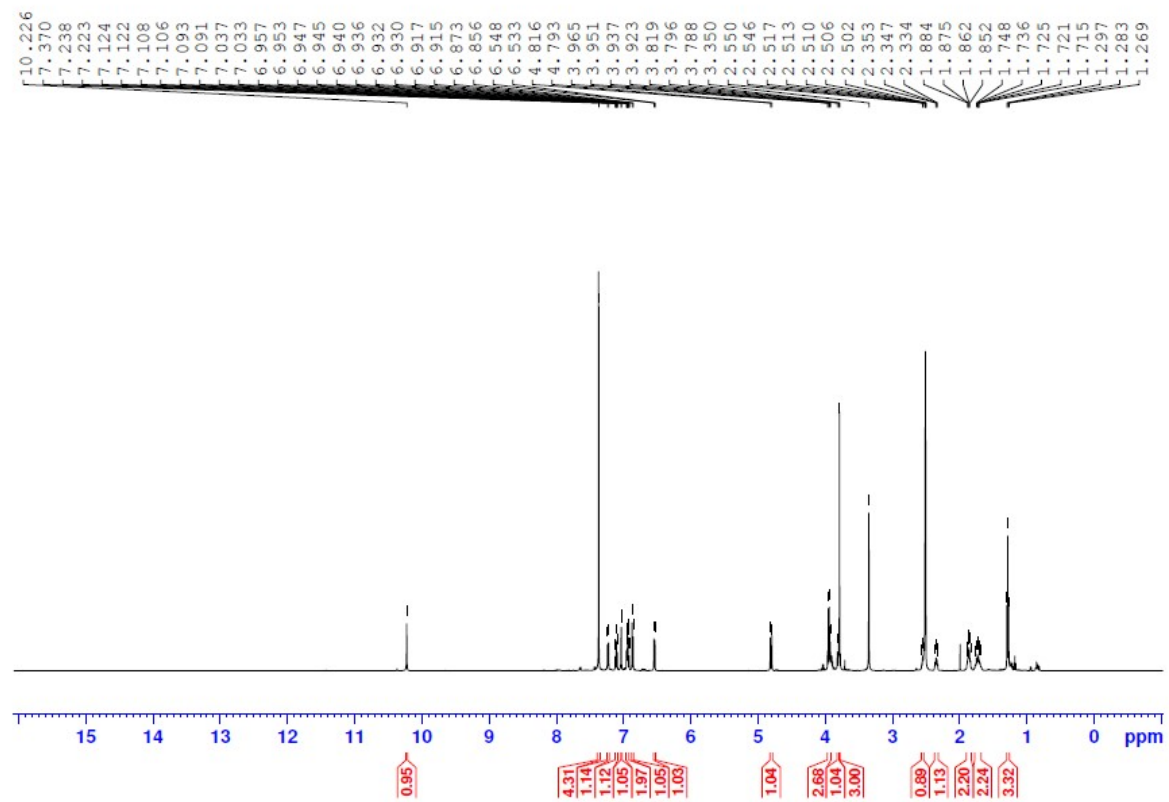

Figure S25. <sup>1</sup>H NMR spectrum of compound 5c.

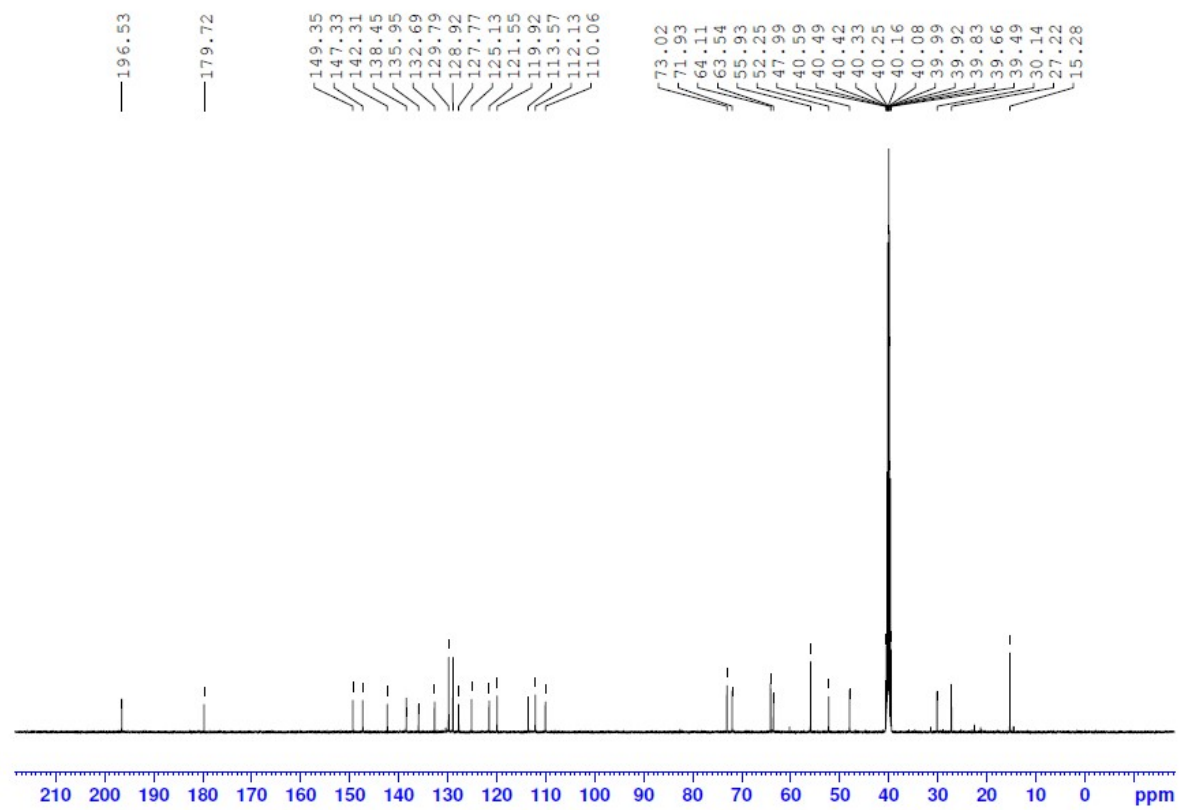

Figure S26.  $^{13}\text{C}$  NMR spectrum of compound **5c**.

# User Spectrum Plot Report

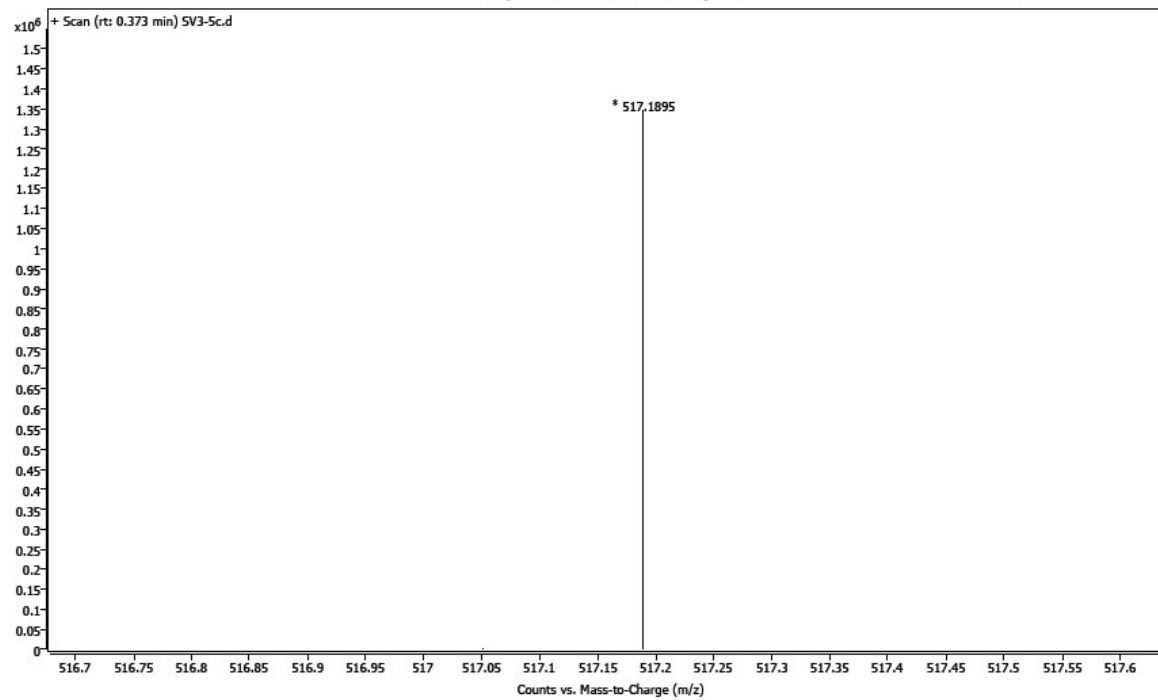

Figure S27. HR-MS spectrum of compound **5c**.

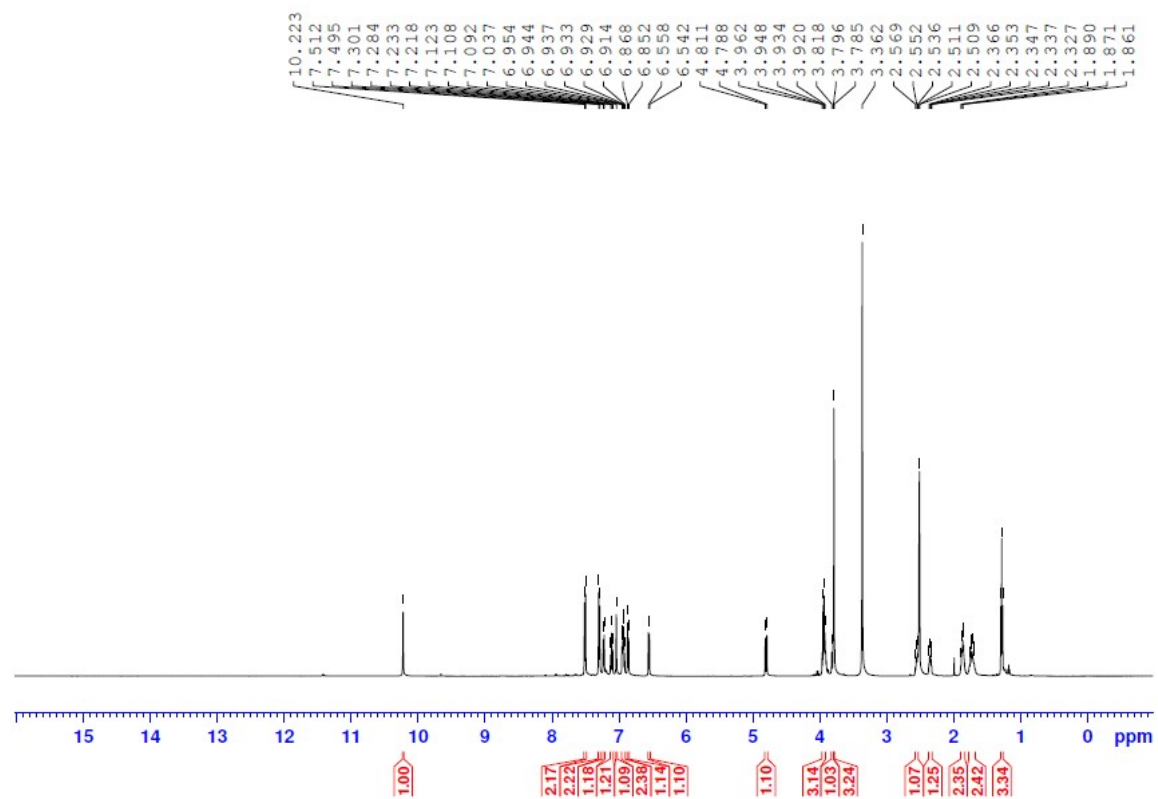

Figure S28.  $^1\text{H}$  NMR spectrum of compound **5d**.

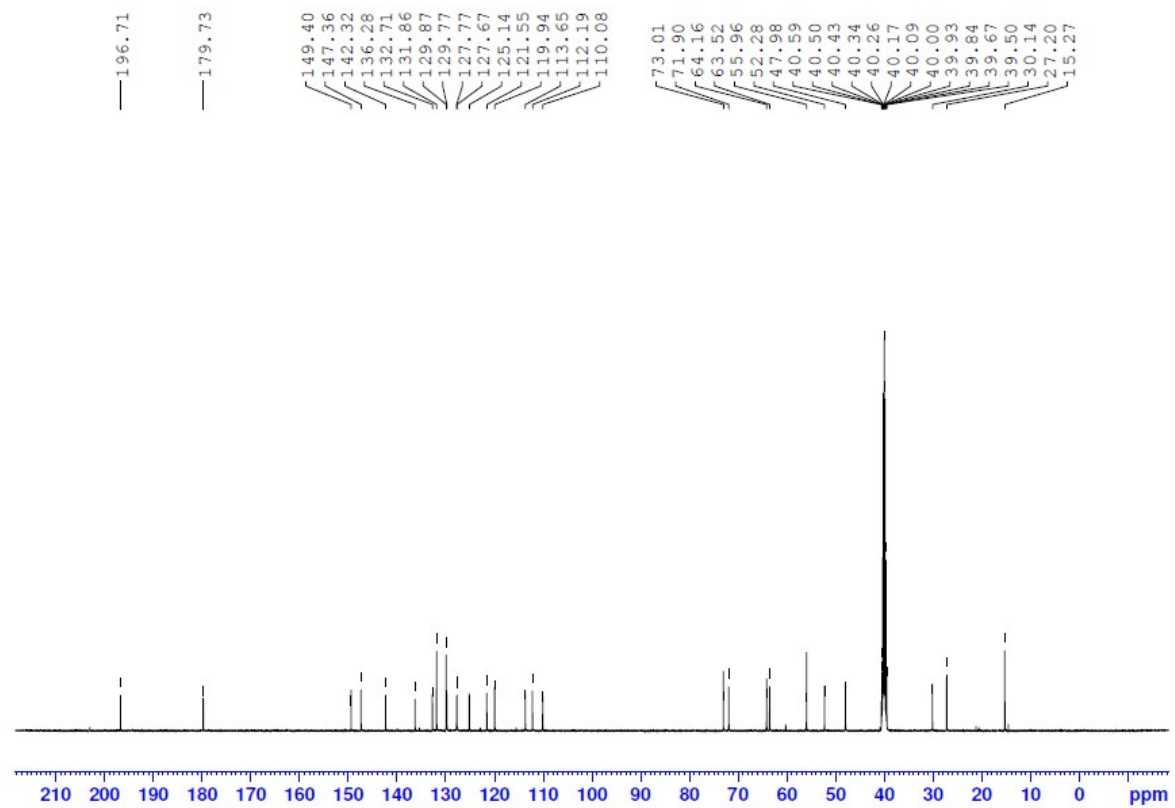

Figure S29.  $^{13}\text{C}$  NMR spectrum of compound **5d**.

# User Spectrum Plot Report

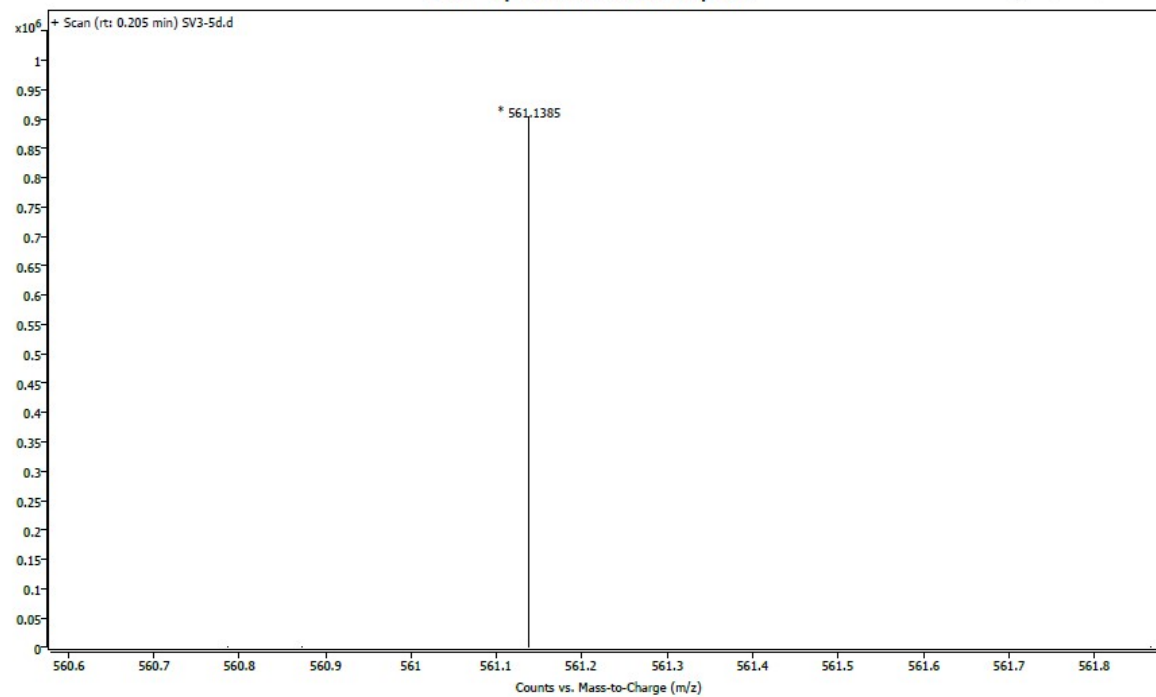

Figure S30. HR-MS spectrum of compound **5d**.

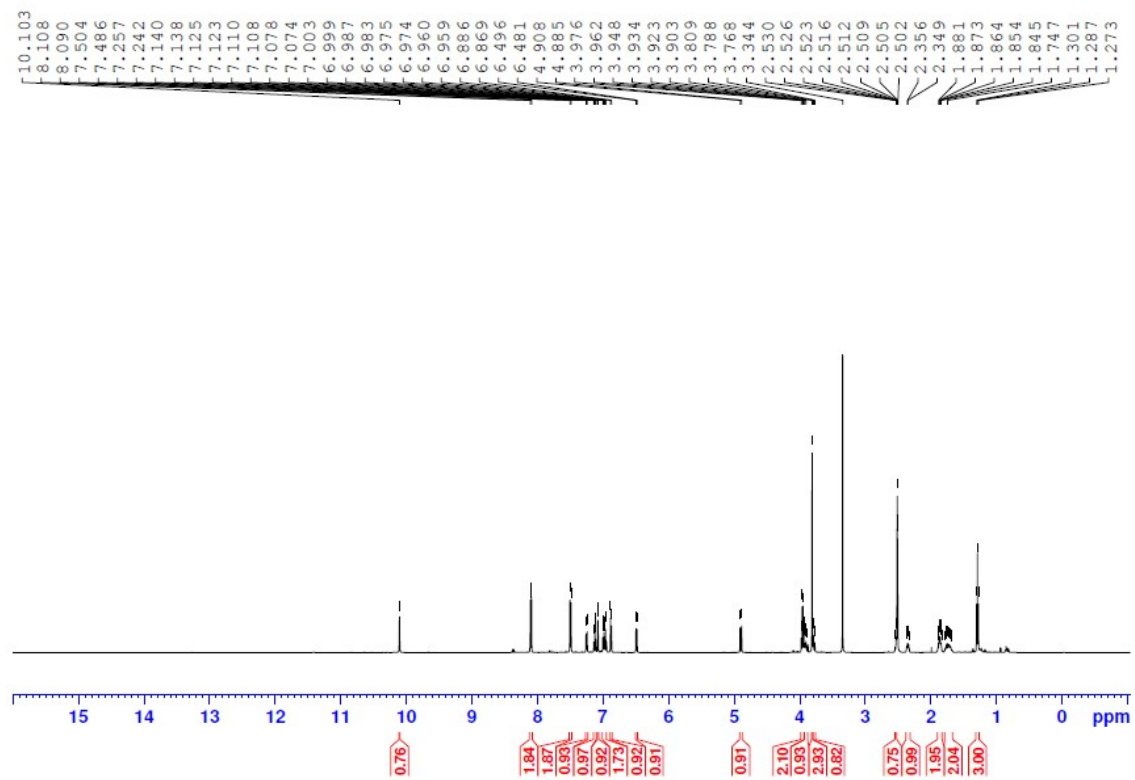

Figure S31. <sup>1</sup>H NMR spectrum of compound **5e**.

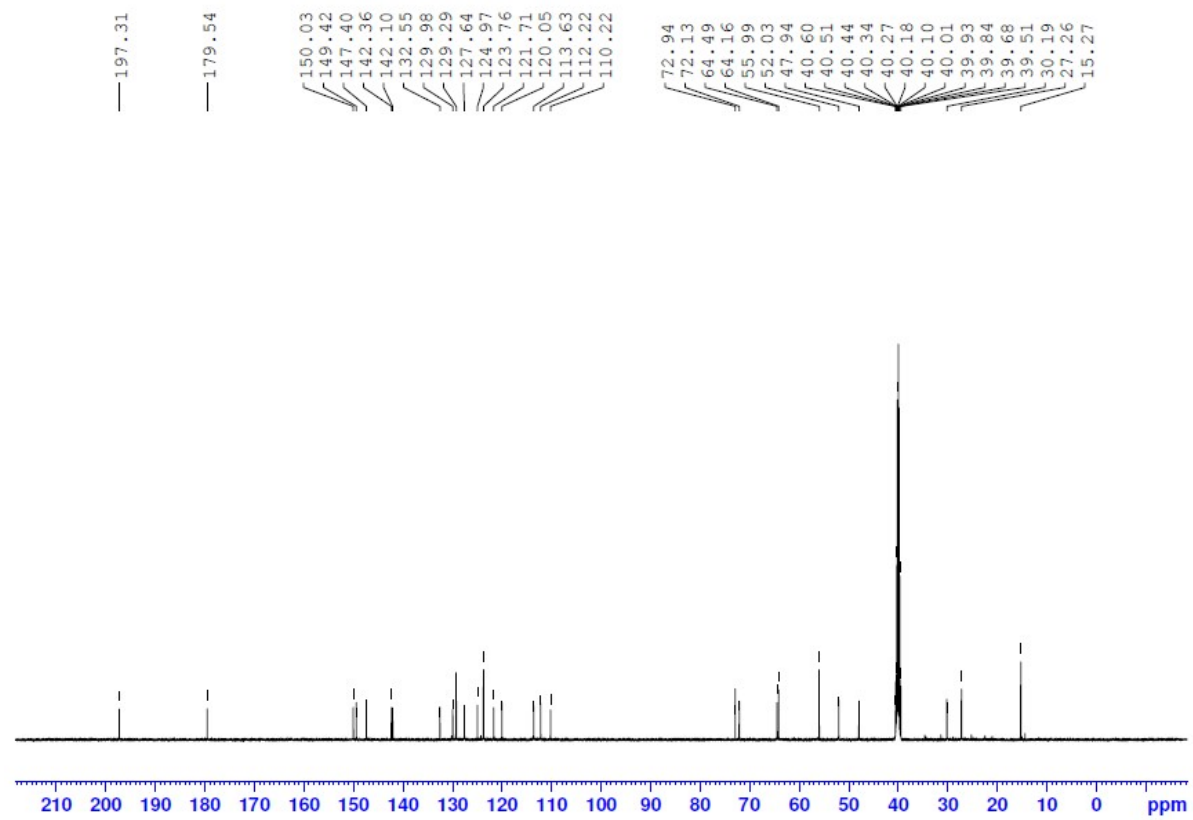

Figure S32.  $^{13}\text{C}$  NMR spectrum of compound **5e**.



# Spectrum Plot Report

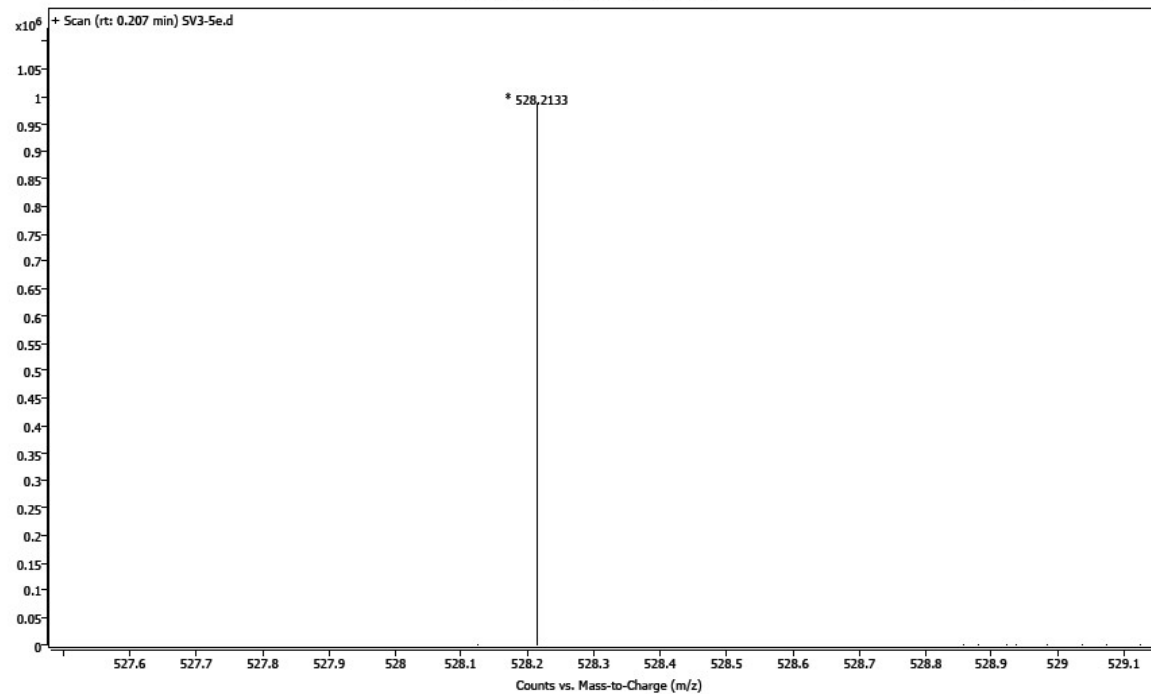

Figure S33. HR-MS spectrum of compound **5e**.

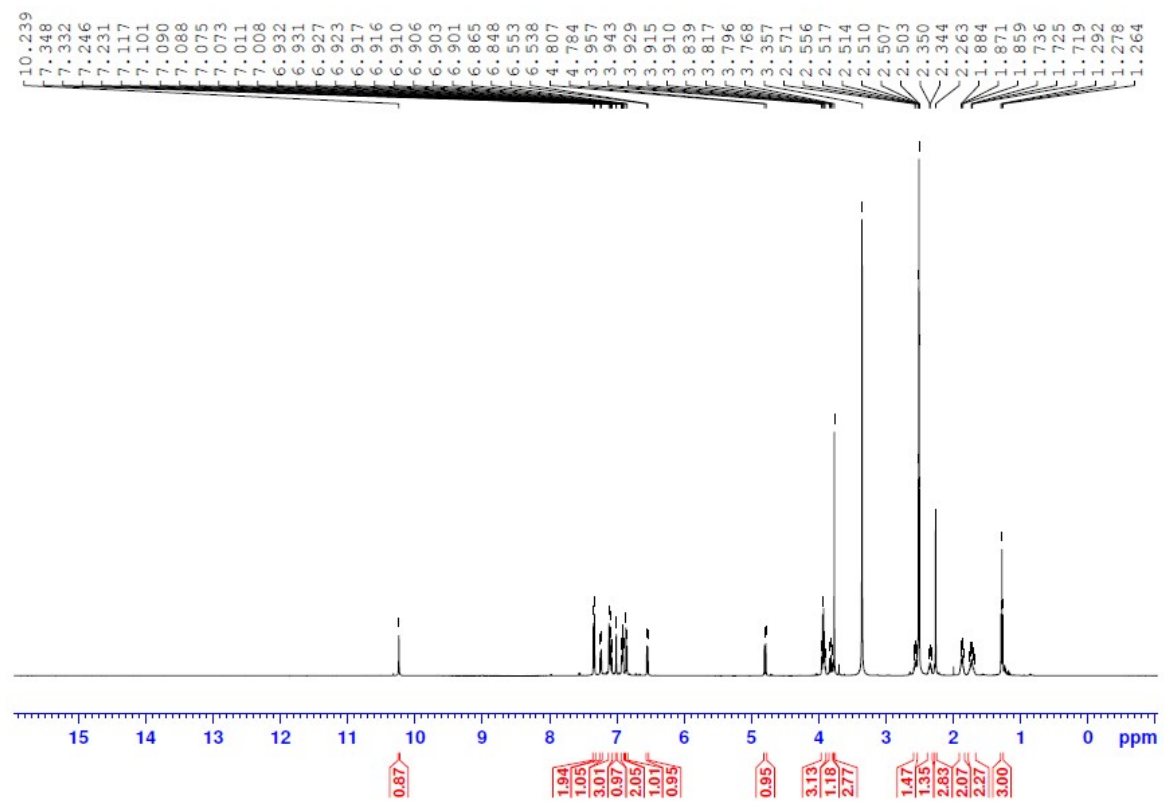

Figure S34.  $^1\text{H}$  NMR spectrum of compound **5f**.

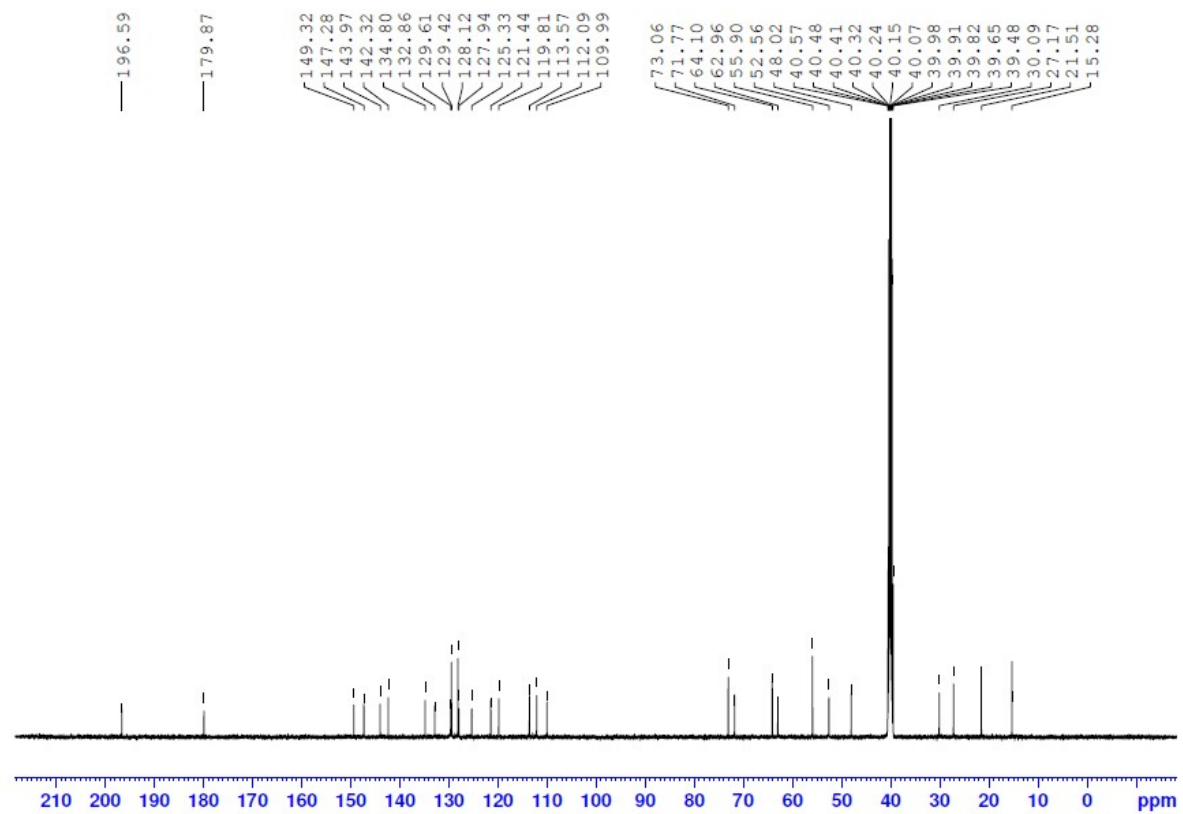

Figure S35.  $^{13}\text{C}$  NMR spectrum of compound **5f**.

# Spectrum Plot Report

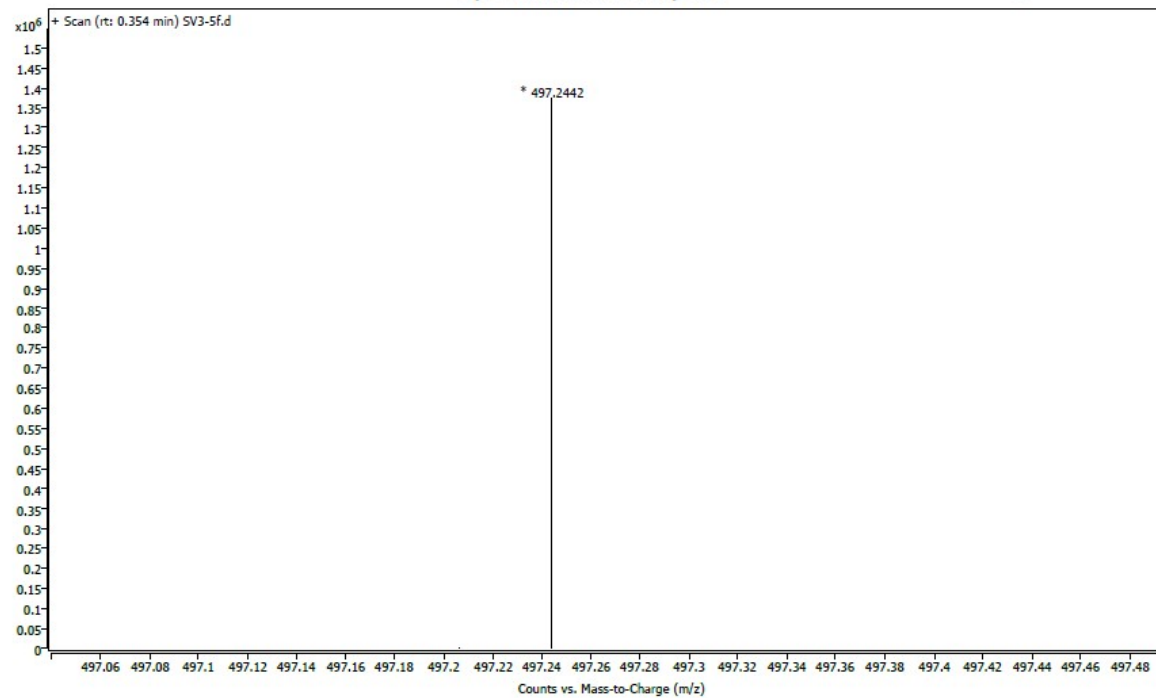

Figure S36. HR-MS spectrum of compound **5f**.

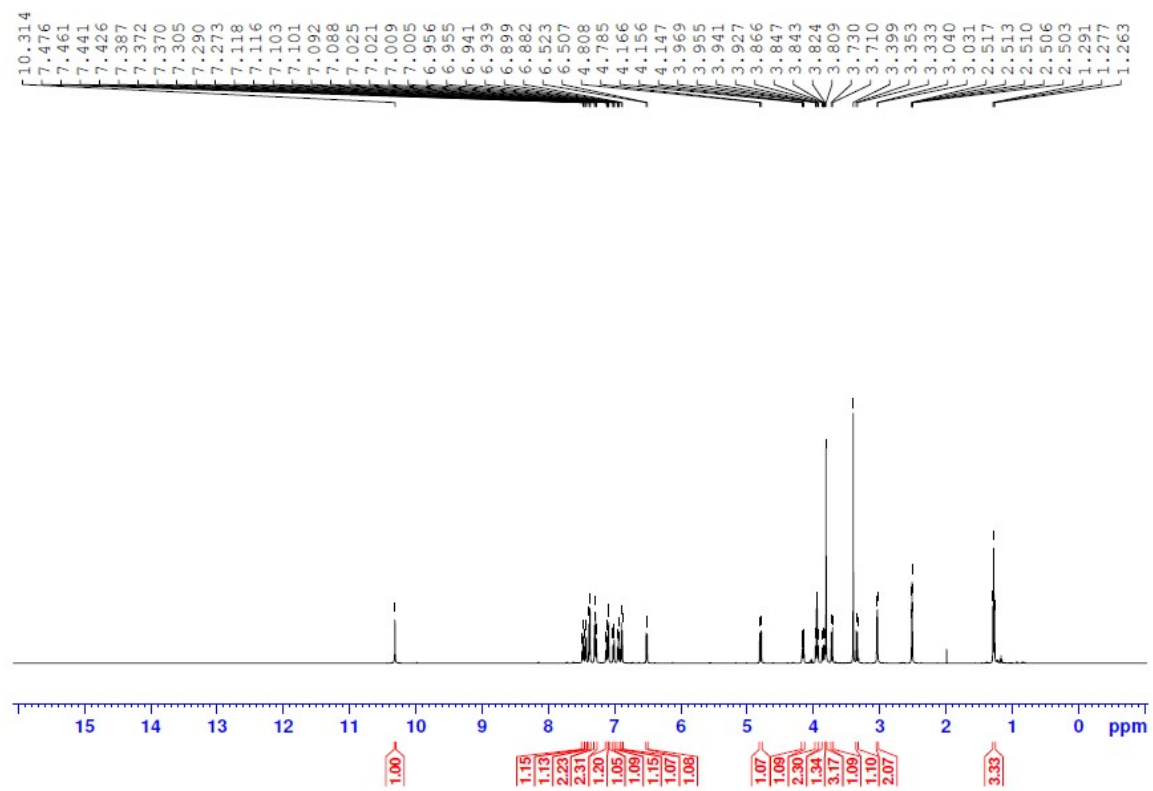

Figure S37. <sup>1</sup>H NMR spectrum of compound 6a.

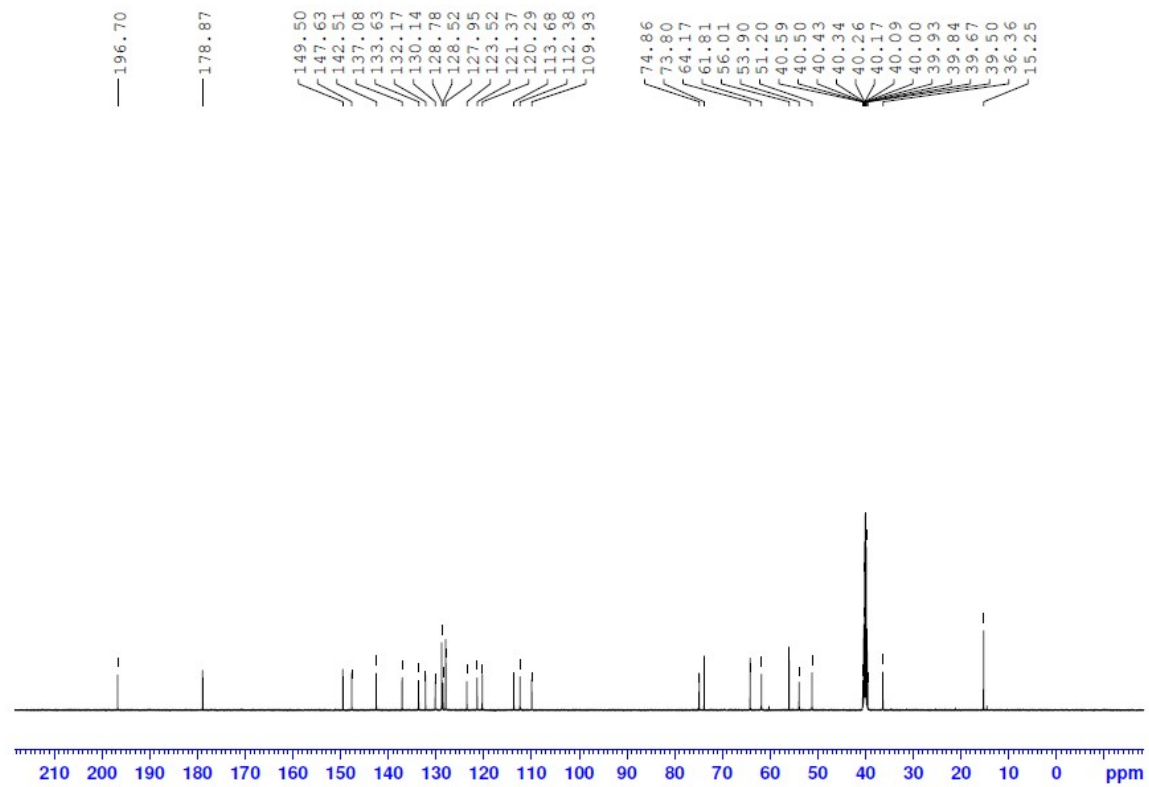

Figure S38.  $^{13}\text{C}$  NMR spectrum of compound **6a**.

# Spectrum Plot Report

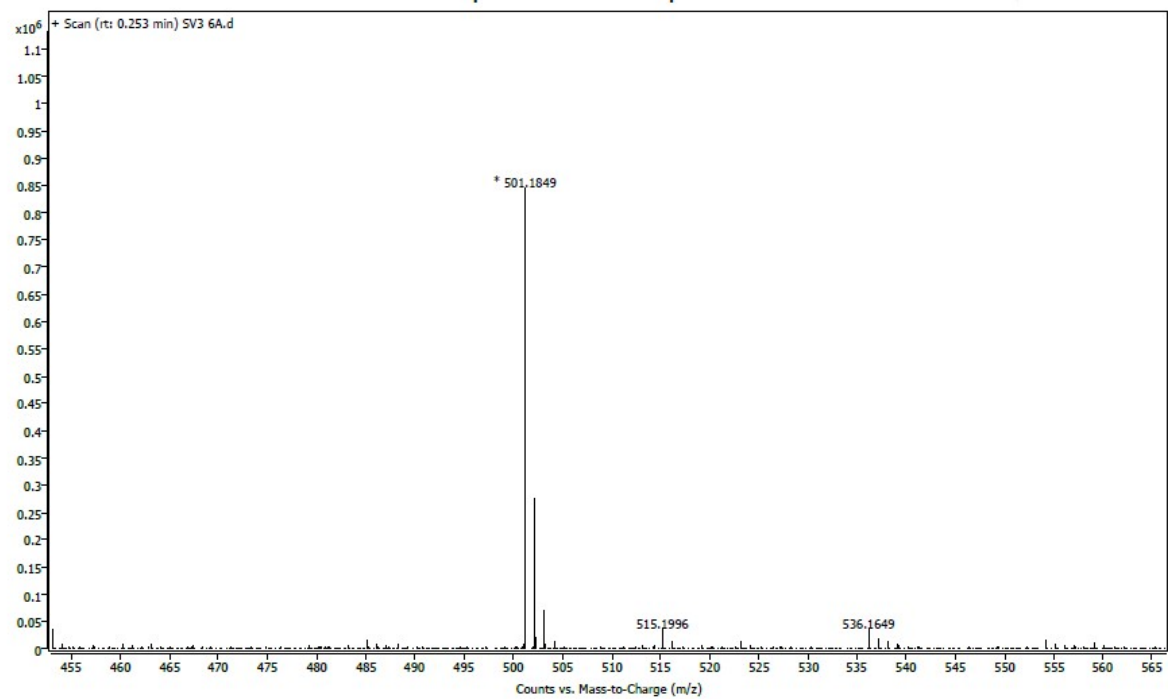

Figure S39. HR-MS spectrum of compound **6a**.

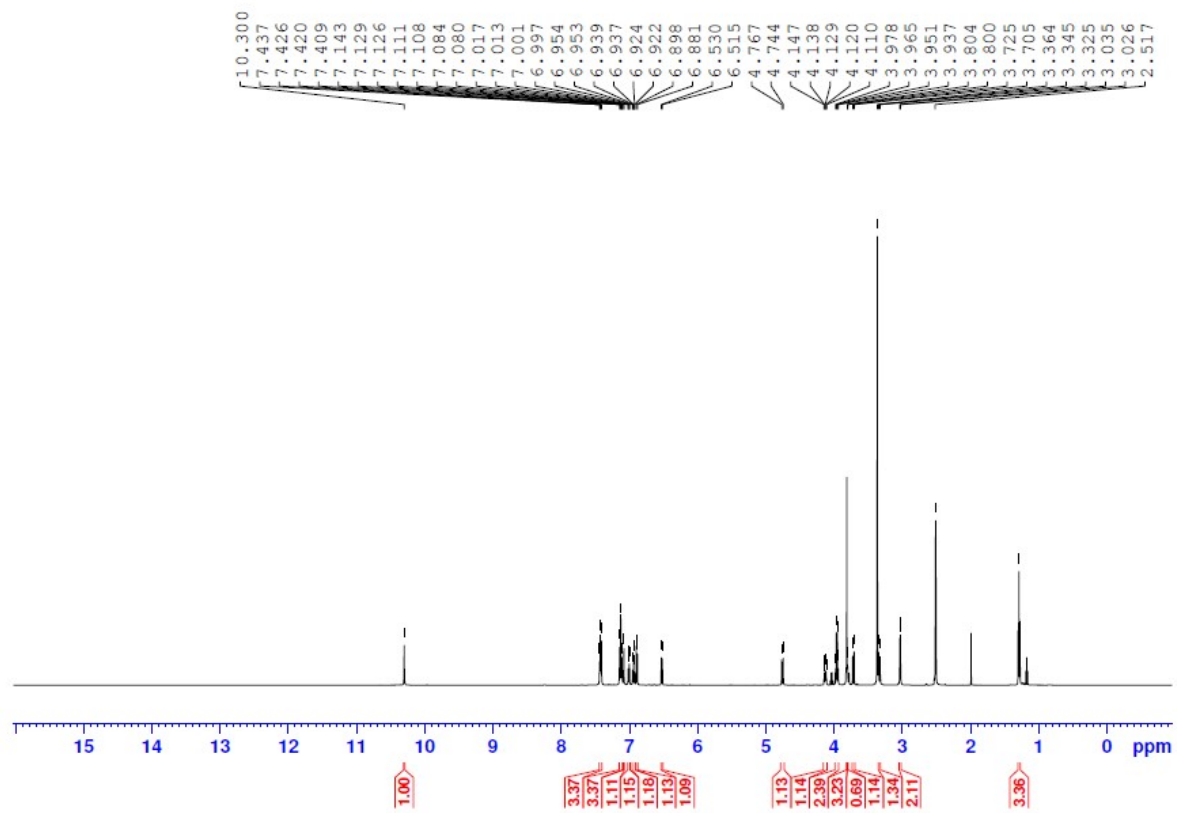

Figure S40.  $^1\text{H}$  NMR spectrum of compound **6b**.



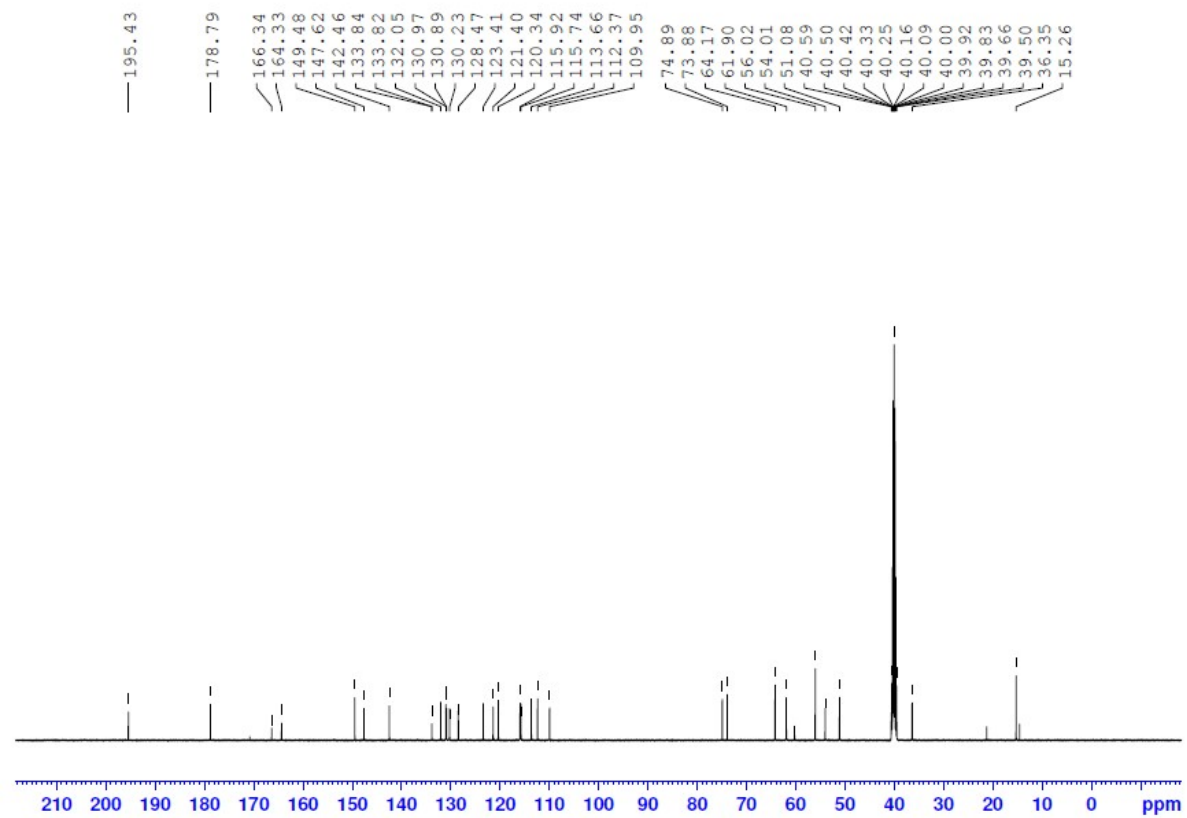

Figure S41.  $^{13}\text{C}$  NMR spectrum of compound **6b**.

# Spectrum Plot Report

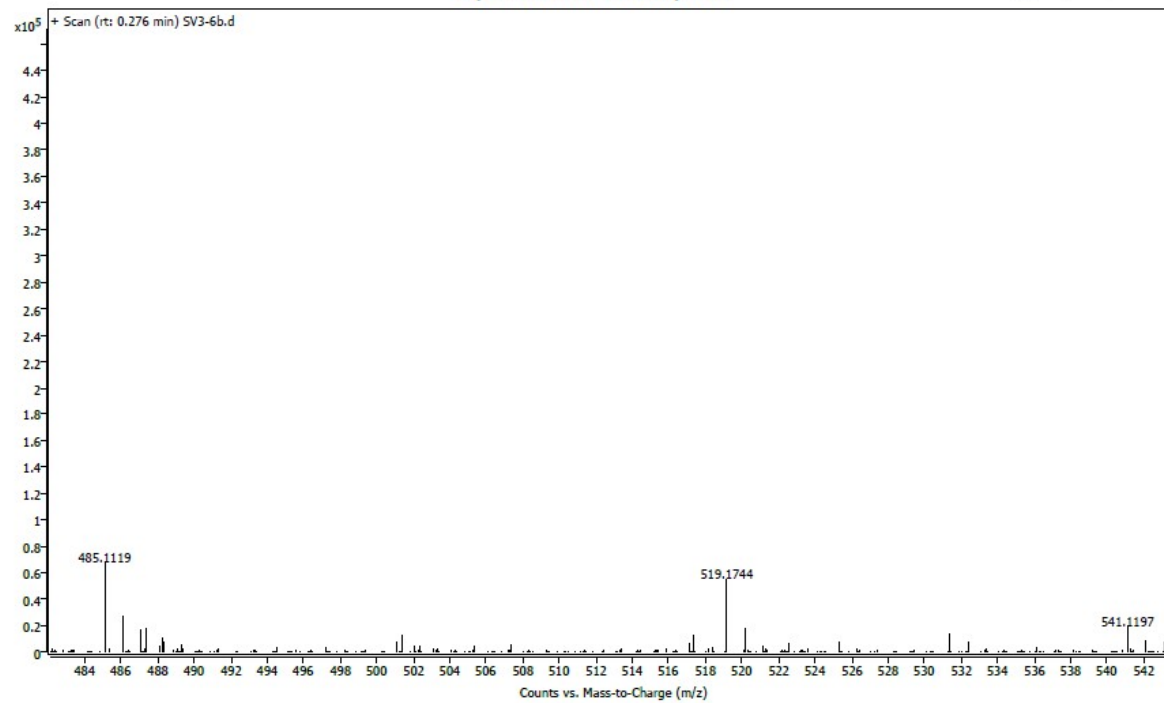

Figure S42. HR-MS spectrum of compound **6b**.

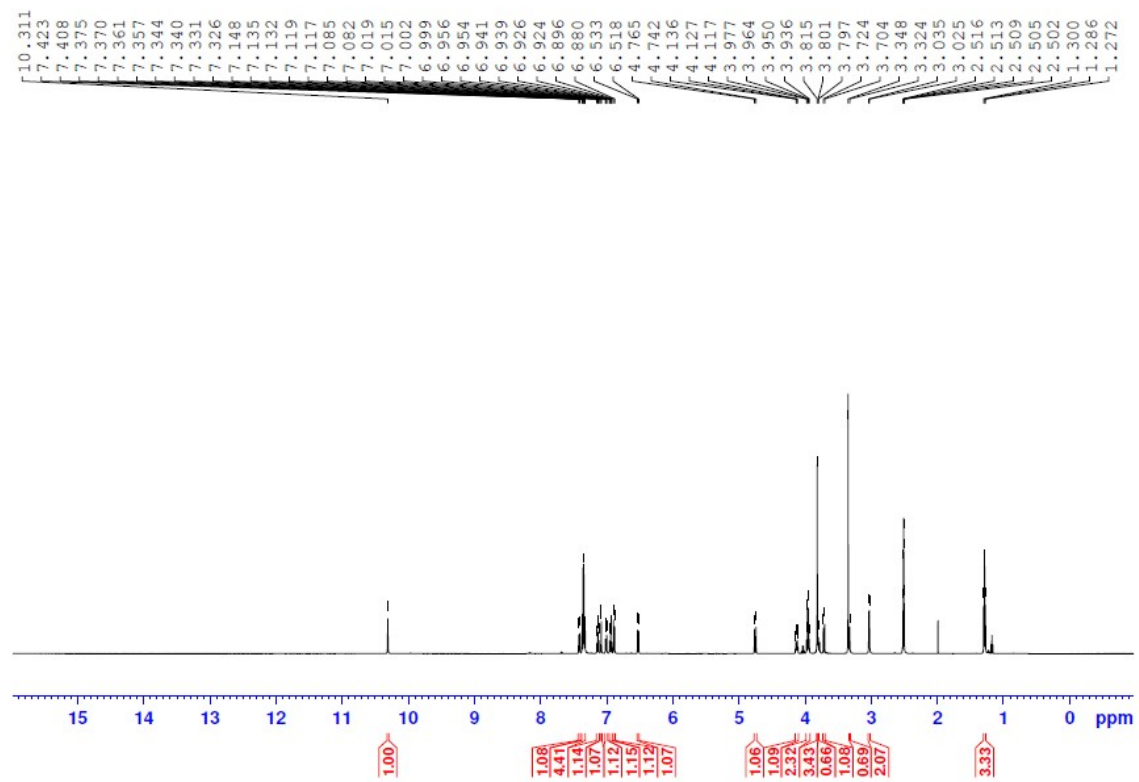

Figure S43.  $^1\text{H}$  NMR spectrum of compound **6c**.

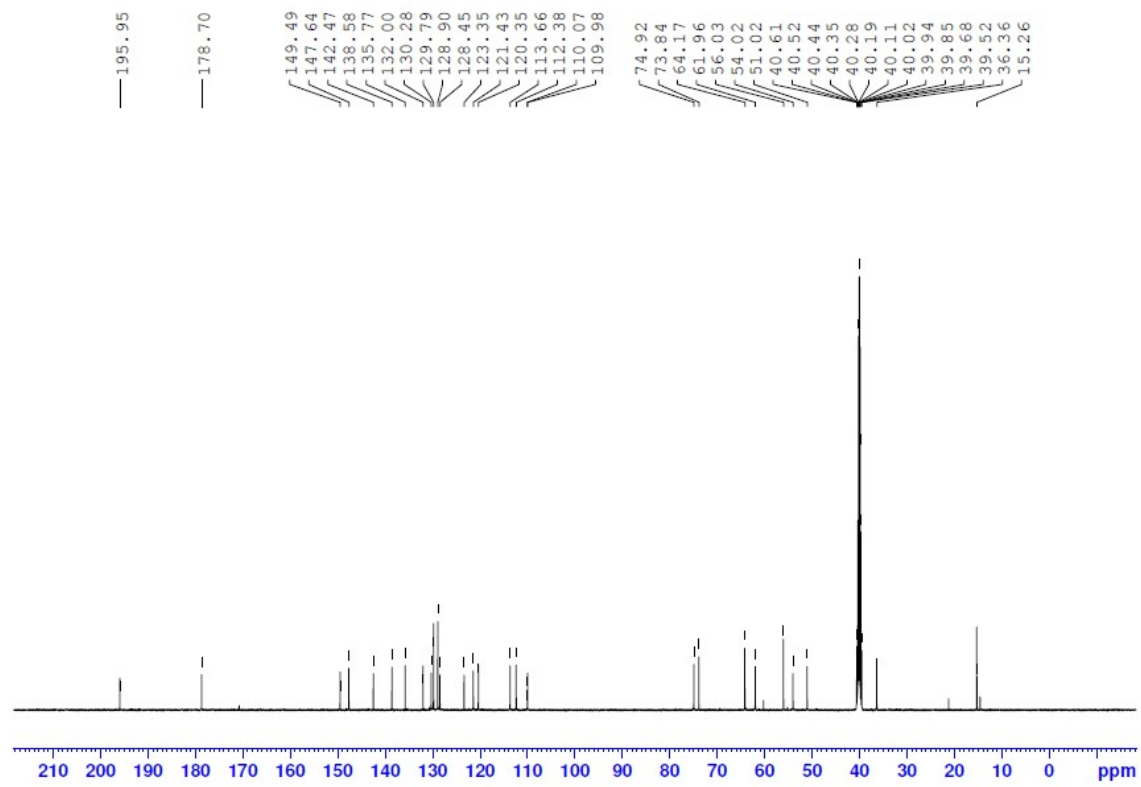

Figure S44.  $^{13}\text{C}$  NMR spectrum of compound **6c**.

# Spectrum Plot Report

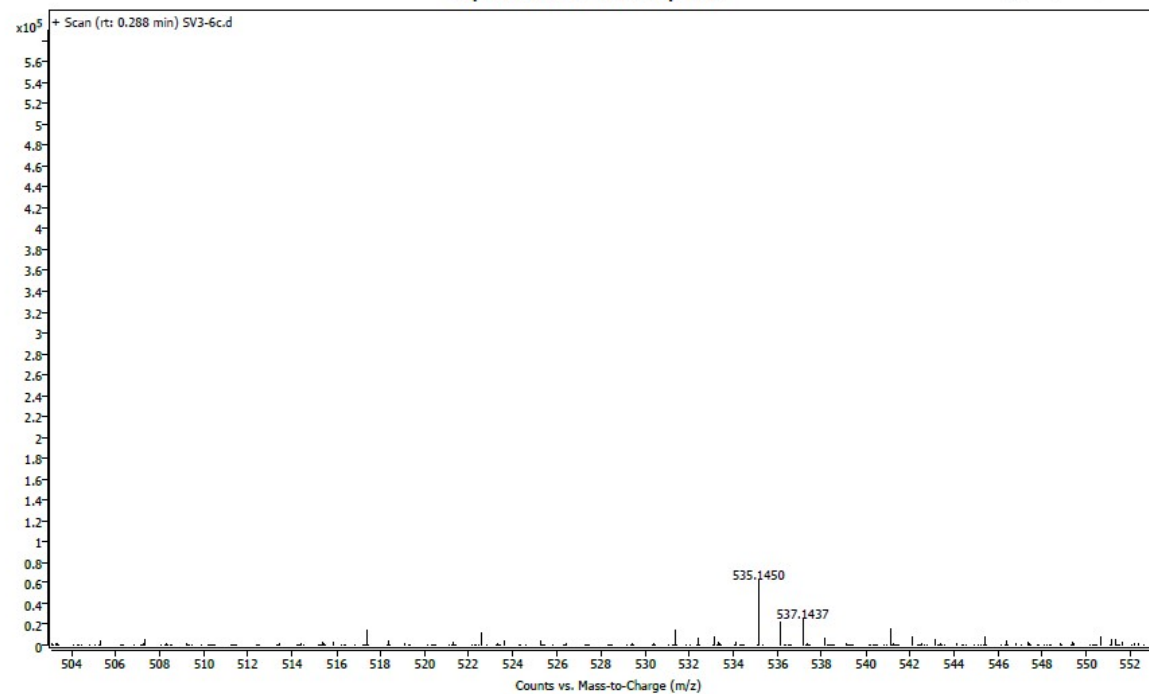

Figure S45. HR-MS spectrum of compound **6c**.

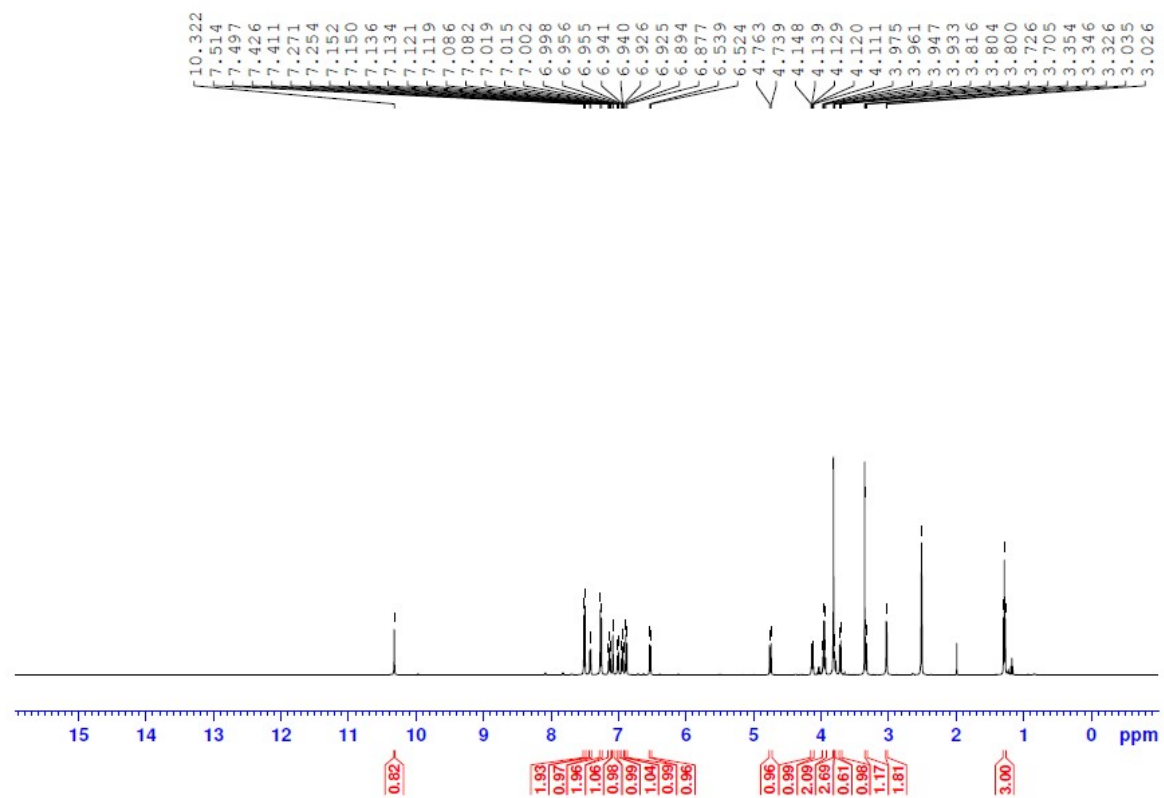

Figure S46. <sup>1</sup>H NMR spectrum of compound 6d.

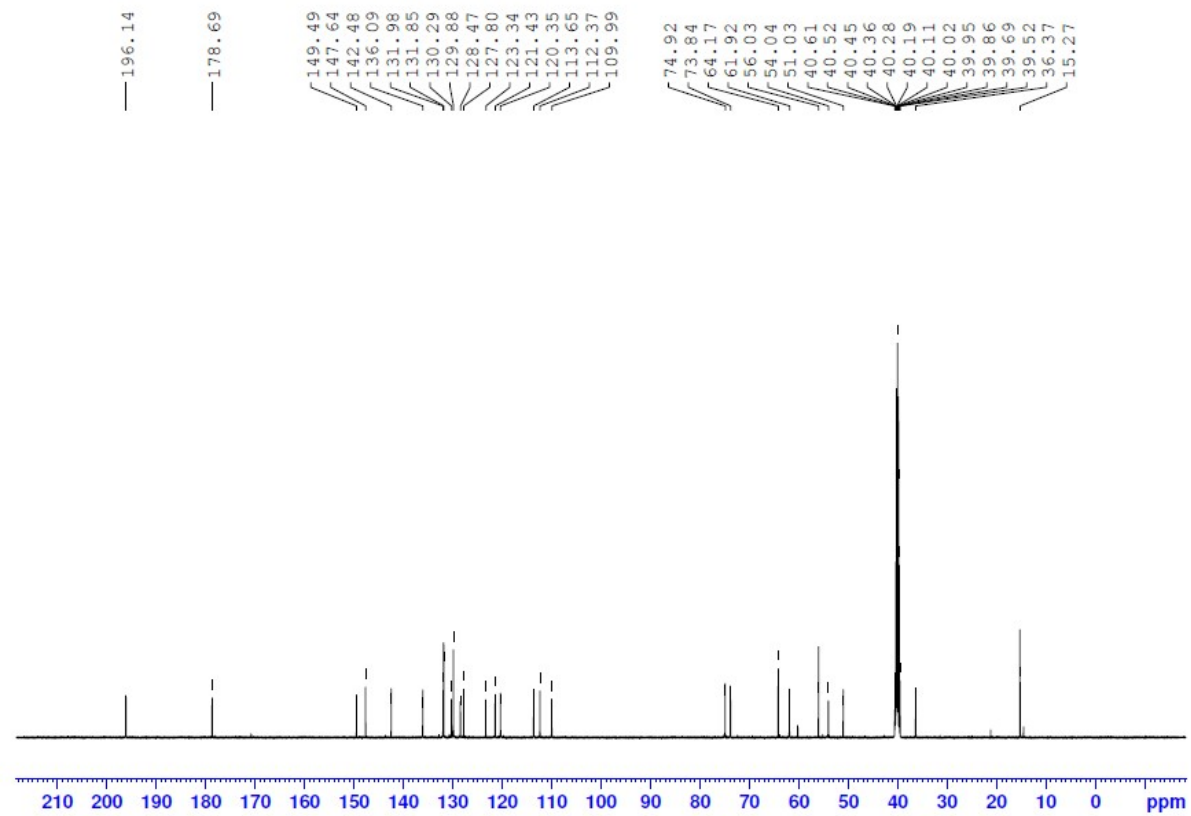

Figure S47.  $^{13}\text{C}$  NMR spectrum of compound **6d**.

# Spectrum Plot Report

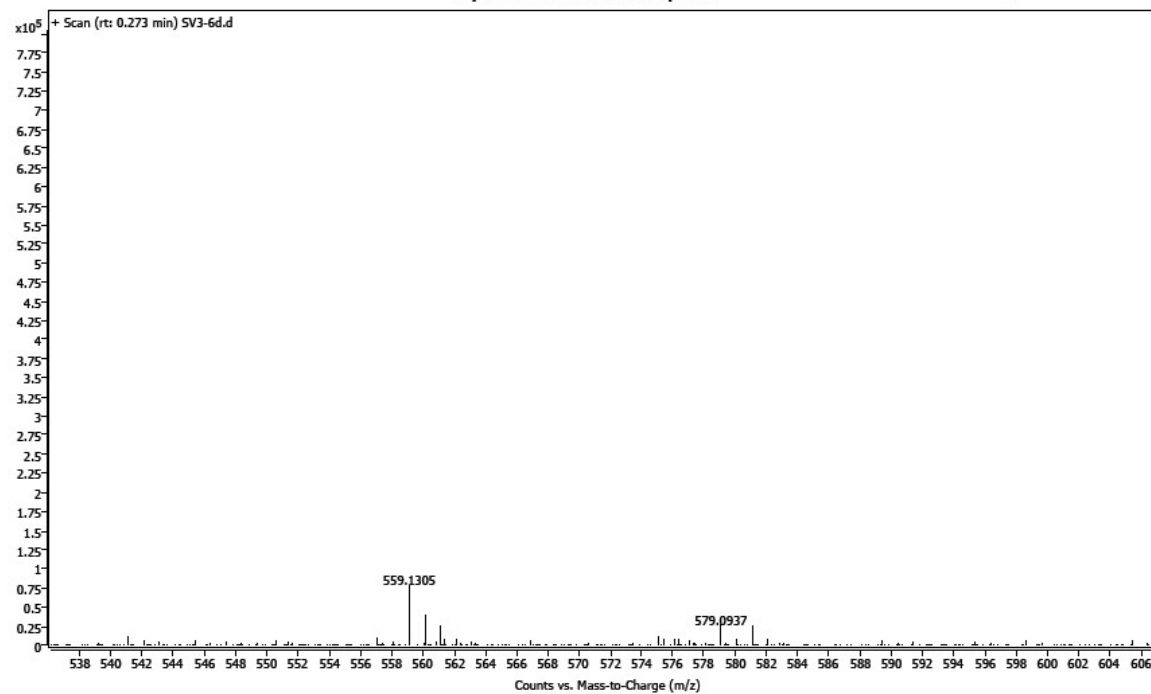

Figure S48. HR-MS spectrum of compound **6d**.



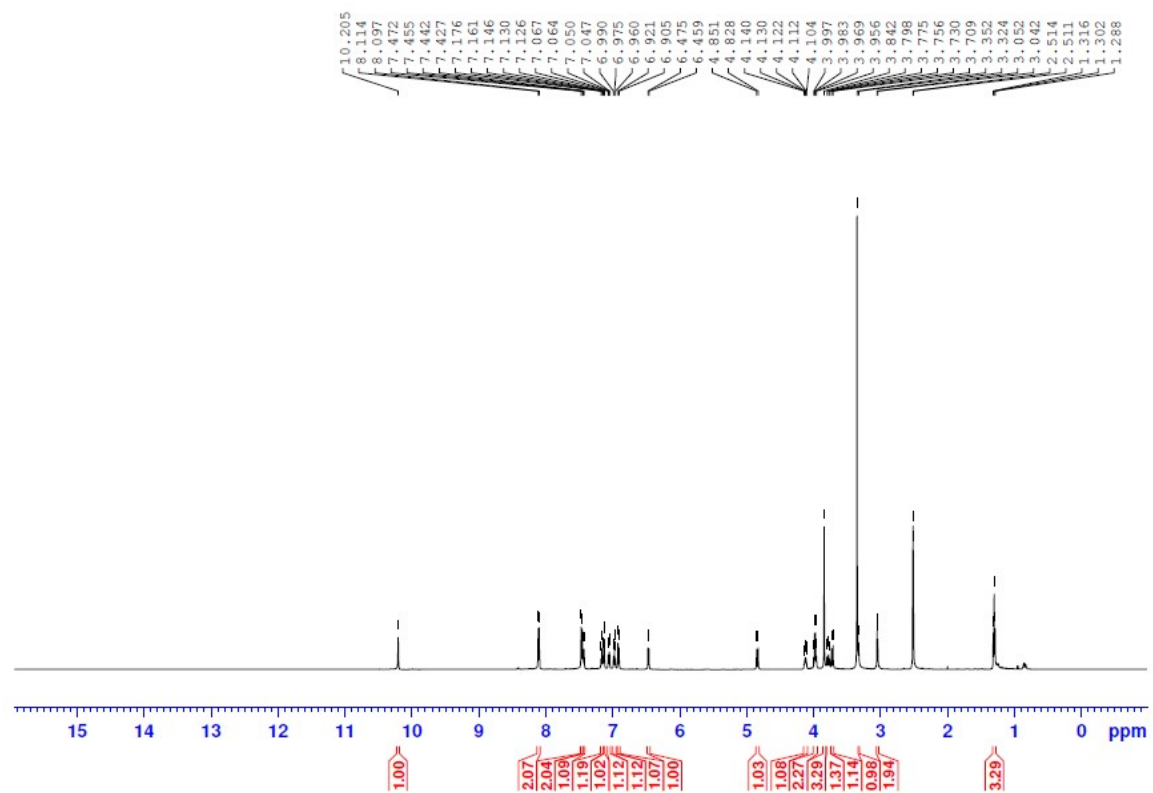

Figure S49.  $^1\text{H}$  NMR spectrum of compound **6e**.

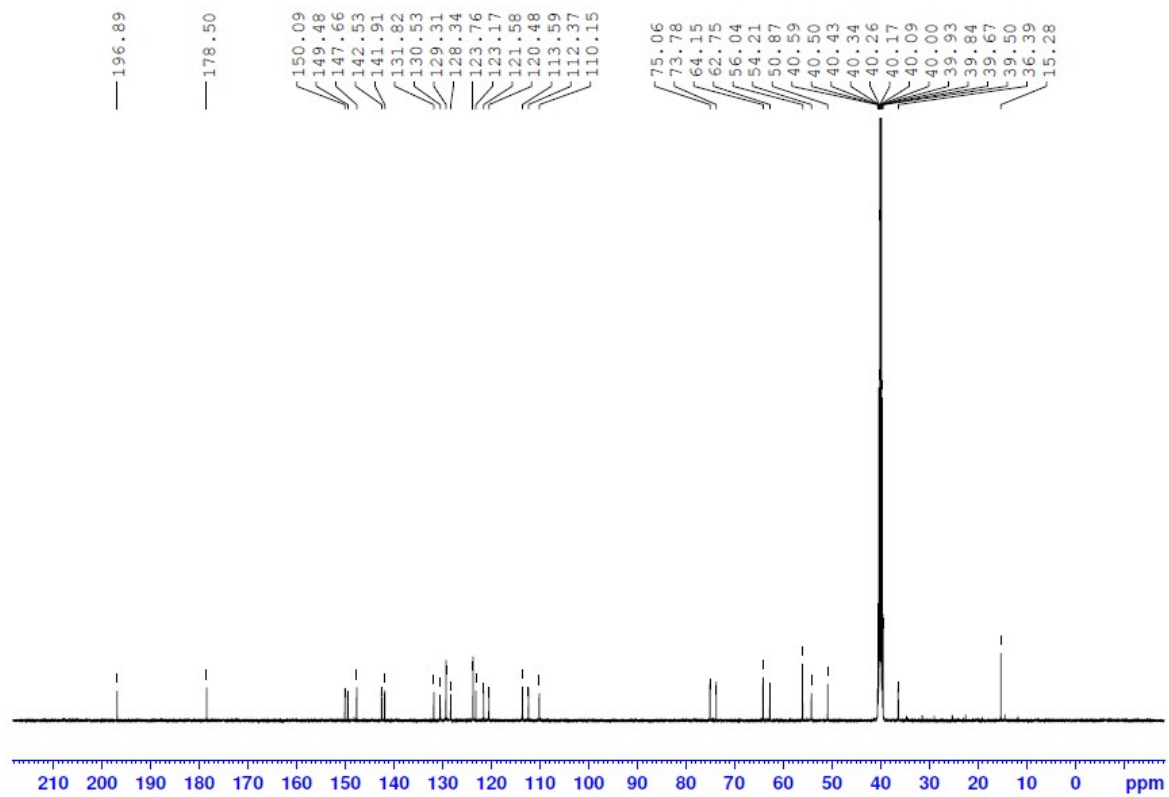

Figure S50.  $^{13}\text{C}$  NMR spectrum of compound 6e.

# Spectrum Plot Report

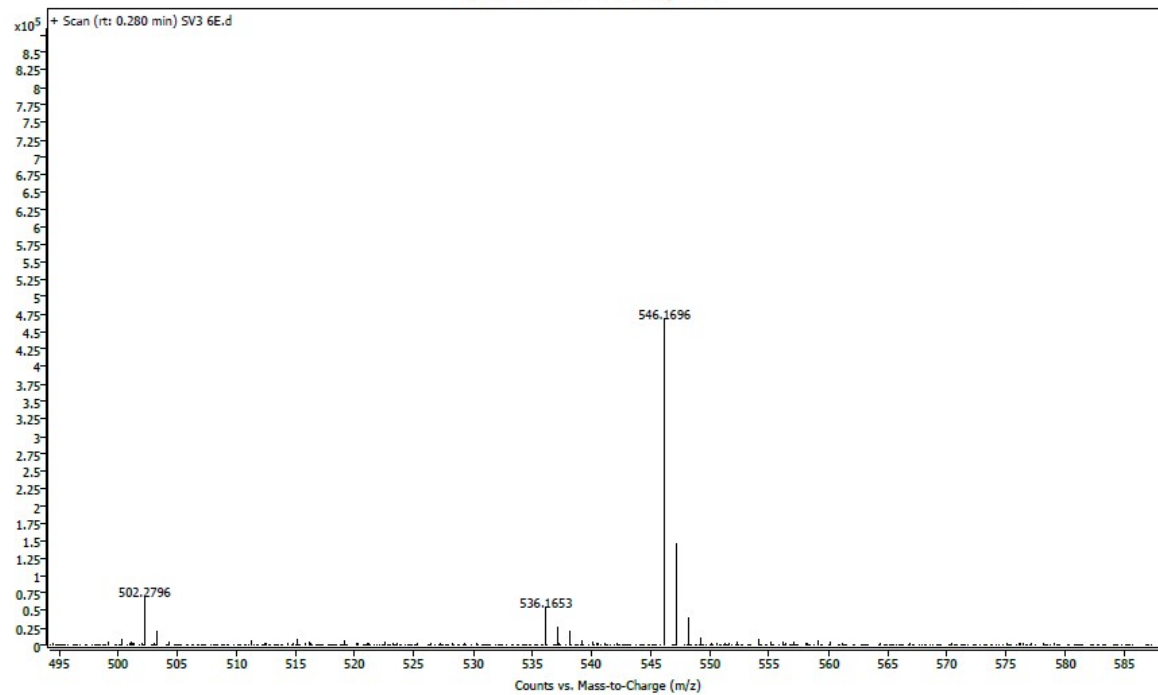

Figure S51. HR-MS spectrum of compound **6e**.

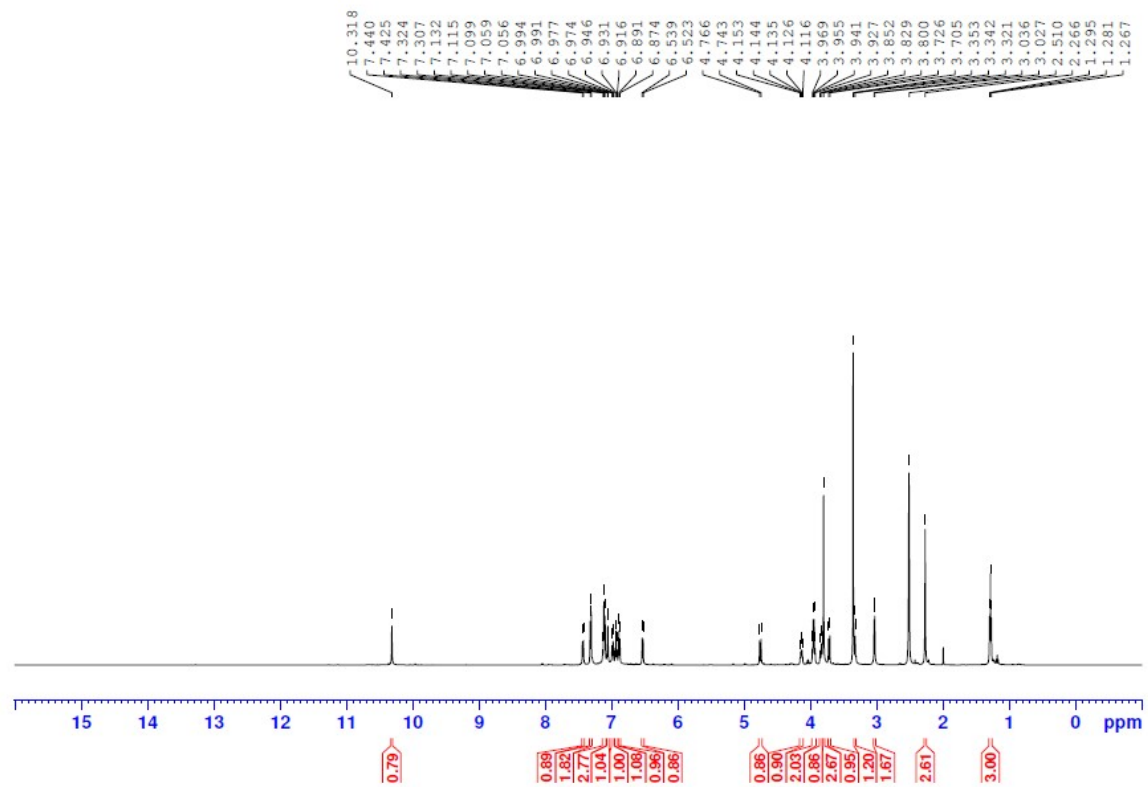

Figure S52. <sup>1</sup>H NMR spectrum of compound 6f.

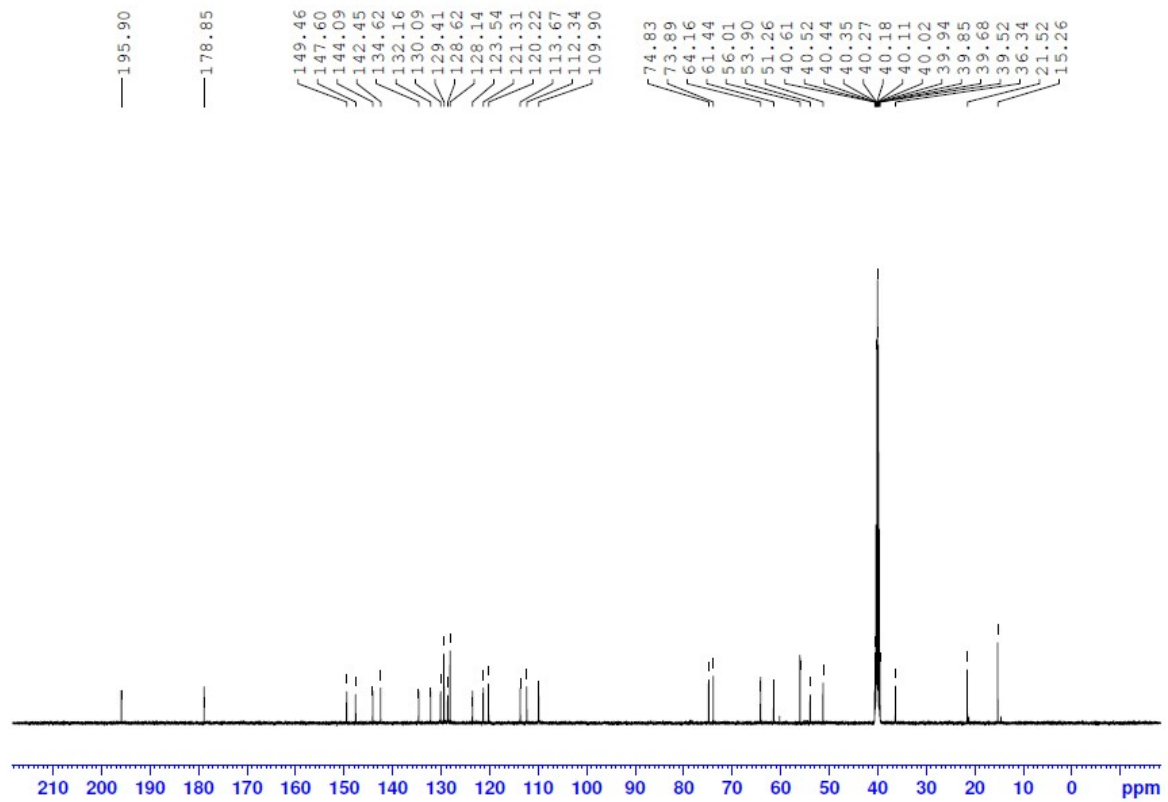

Figure S53.  $^{13}\text{C}$  NMR spectrum of compound **6f**.

# Spectrum Plot Report

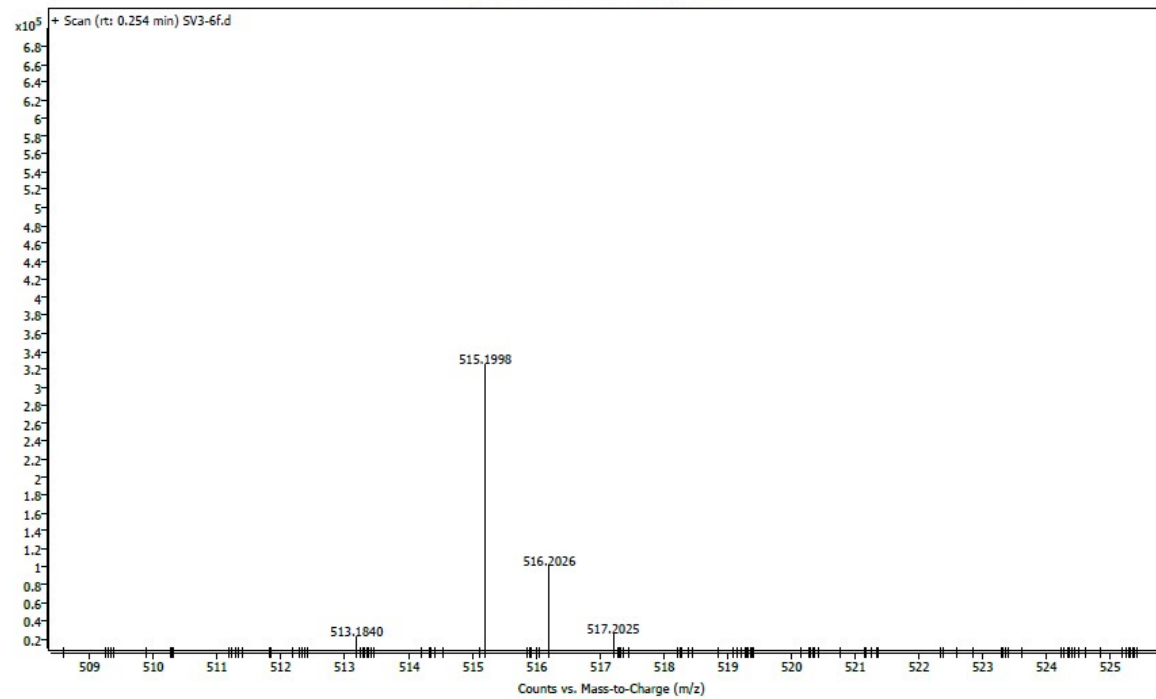

Figure S54. HR-MS spectrum of compound **6f**.

## References

- 1 F. Anam, A. Abbas, K. M. Lo, S. Hameed, P. Ramasami, Y. Umar, A. Ullah and M. M. Naseer, Synthesis, crystal structure, experimental; and theoretical investigations of 3-(4-ethoxy-3-methoxyphenyl)-1-phenylprop-2-en-1-one, *J. Mol. Struct.* 2017, **1127**, 742-750.
- 2 S. M. Patil, K. R. Maruthi, S. N. Bajpe, V. M. Vyshali, S. Sushmitha, C. Akhila and R. Ramu, Comparative molecular docking and simulation analysis of molnupiravir and remdesivir with SARS-CoV-2 RNA dependent RNA polymerase (RdRp), *Bioinform.*, 2021, **17**, 932-939.
- 3 R. M. Martiz, S. M. Patil, M. Abdulaziz, A. Babalghith, M. Al-Areefi, M. Al-Ghorbani, J. M. Kumar, A. Prasad, N. P. M. Nagalingaswamy and R. Ramu, Defining the Role of Isoeugenol from *Ocimum tenuiflorum* against Diabetes Mellitus-Linked Alzheimer's Disease through Network Pharmacology and Computational Methods, *Molecules*, 2022, **27**, 2398.
- 4 J. Porter, A. Payne, B. de Candole, D. Ford, B. Hutchinson, G. Trevitt, J. Turner, C. Edwards, C. Watkins, I. Whitcombe and J. Davis, Tetrahydroisoquinoline amide substituted phenyl pyrazoles as selective BCL2 inhibitors, *Bioorg. Med. Chem. Lett.*, 2009, **19**, 230-233.
- 5 B. Fang, G. Fu, J. Agniswamy, R. W. Harrison and I. T. Weber, Caspase-3 binds diverse P4 residues in peptides as revealed by crystallography and structural modelling, *Apoptosis*, 2009, **14**, 741-752.
- 6 W. Zhang, B. Chakravarty, F. Zheng, Z. Gu, H. Wu, J. Mao, S. J. Wakil and F. A. Quiocho, Crystal structure of FAS thioesterase domain with polyunsaturated fatty acyl adduct and inhibition by dihomo- $\gamma$ -linolenic acid, *Proc. Natl. Acad. Sci.*, 2011, **108**, 15757-15762.
- 7 R. M. Martiz, S. M. Patil, D. T. Hombegowda, A. M. Shbeer, T. Alqadi, M. Al-Ghorbani, R. Ramu and A. Prasad, Phyto-Computational Intervention of Diabetes Mellitus at Multiple Stages Using Isoeugenol from *Ocimum tenuiflorum*: A Combination of Pharmacokinetics and Molecular Modelling Approaches, *Molecules*, 2022, **27**, 6222.
- 8 S. M. Patil, R. M. Martiz, R. Ramu, P. S. Shirahatti, A. Prakash, S. J. Chandra and V. L. Ranganatha, In silico identification of novel benzophenone-coumarin derivatives as

- SARS-CoV-2 RNA-dependent RNA polymerase (RdRp) inhibitors, *J. Biomol. Struct. Dyn.*, 2022, **40**, 13032–13048.
- 9 N. Nivetha, S. M. Patil, R. Ramu and S. Velmathi, Stereoselective synthesis of highly functionalized aminobenzothiazole-fused spirooxindole derivatives: in silico and in vitro anti-diabetic studies, *Synthesis*, 2023, **55**, 4145-4162.
  - 10 S. M. Patil, K. A. Al-Mutairi, N. Firdose, R. Ramu and R. M. Martiz, Pharmacoinformatics based screening discovers swertianolin from *Lavandula angustifolia* as a novel neuromodulator targeting epilepsy, depression, and anxiety, *S. Afr. J. Bot.*, 2022, **149**, 712–730.
  - 11 H. Sajal, S. M. Patil, R. Raj, A. M. Shbeer, M. Ageel and R. Ramu, Computer-Aided Screening of Phytoconstituents from *Ocimum tenuiflorum* against Diabetes Mellitus Targeting DPP4 Inhibition: A Combination of Molecular Docking, Molecular Dynamics, and Pharmacokinetics Approaches, *Molecules*, 2022, **27**, 5133.
  - 12 P. G. Anantharaju, D. B. Reddy, M. A. Padukudru, C. M. Chitturi, M. G. Vimalambike and S. V. Madhunapantula, Induction of colon and cervical cancer cell death by cinnamic acid derivatives is mediated through the inhibition of Histone Deacetylases (HDAC), *PLoS One*, 2017, **12**, e0186208.
  - 13 P. K. Veeresh, C. G. Basavaraju, S. Dallavalasa, P. G. Anantharaju, S. M. Natraj, O. A. Sukocheva and S. V. Madhunapantula, Vitamin D3 Inhibits the Viability of Breast Cancer Cells In Vitro and Ehrlich Ascites Carcinomas in Mice by Promoting Apoptosis and Cell Cycle Arrest and by Impeding Tumor Angiogenesis, *Cancers*, 2023, **15**, 4833.
  - 14 A. Breu, K. Rosenmeier, R. Kujat, P. Angele and W. Zink, The cytotoxicity of bupivacaine, ropivacaine, and mepivacaine on human chondrocytes and cartilage, *Anesth. Analg.*, 2013, **117**, 514–522.
  - 15 J. Dewangan, S. Srivastava, S. Mishra, A. Divakar, S. Kumar and S. K. Rath, Salinomycin inhibits breast cancer progression via targeting HIF-1 $\alpha$ /VEGF mediated tumor angiogenesis in vitro and in vivo, *Biochem. Pharmacol.*, 2019, **164**, 326–335.
  - 16 J. Dewangan, D. Tandon, S. Srivastava, A. K. Verma, A. Yapuri and S. K. Rath, Novel combination of salinomycin and resveratrol synergistically enhances the anti-proliferative and pro-apoptotic effects on human breast cancer cells, *Apoptosis*, 2017, **22**, 1246–1259.
